# Supplementary material for: The Role of Neutral Sphingomyelinase-2 (NSM2) in the Control of Neutral Lipid Storage in T Cells
Source: MDPI journal article supplement (doi:10.3390/ijms25063247), 2024-03-13
Supplement: s1 [file s1]

## Supplementary Tables

### The role of Neutral sphingomyelinase-2 (NSM2) in the control of neutral lipid storage in T cells

Rebekka Schempp <sup>1</sup>, Janna Eilts <sup>2</sup>, Marie Schöl <sup>1</sup>, Maria Fernanda Grijalva Yépez <sup>1</sup>, Agnes Fekete <sup>3</sup>, Dominik Wigger <sup>4</sup>, Fabian Schumacher <sup>4</sup>, Burkhard Kleuser <sup>4</sup>, Marco van Ham <sup>5</sup>, Lothar Jänsch <sup>5</sup>, Markus Sauer <sup>2</sup>, Elita Avota <sup>1\*</sup>

<sup>1</sup> Institute for Virology and Immunobiology, University of Würzburg, 97078 Würzburg, Germany

<sup>2</sup> Department of Biotechnology and Biophysics, Biocenter, University of Würzburg, 97074 Würzburg, Germany

<sup>3</sup> Pharmaceutical Biology, Julius-von-Sachs-Institute, Biocenter, University of Würzburg, 97082 Würzburg, Germany

<sup>4</sup> Institute of Pharmacy, Department of Pharmacology and Toxicology, Freie Universität Berlin, 14195 Berlin, Germany

<sup>5</sup> Cellular Proteome Research Group, Helmholtz Centre for Infection Research, 38124 Braunschweig, Germany

\* Correspondence: elita.avota@uni-wuerzburg.de

**Table S1.** 1314 significantly enriched proteins detected in nano-environment of NSM2 and identified by protein mass spectrometry. 34 significantly and highly enriched proteins are marked in bold.

| Gene Symbol    | Protein Accession ID | Description                                                  | log2 (+H2O2/-H2O2) | -log10 (p value) | Cut Off |
|----------------|----------------------|--------------------------------------------------------------|--------------------|------------------|---------|
| <b>HGS</b>     | O14964               | hepatocyte growth factor-regulated tyrosine kinase substrate | 5,71               | 3,87             | PASS    |
| <b>CARS1</b>   | B4DKY1               | cysteinyl-tRNA synthetase 1                                  | 5,16               | 4,37             | PASS    |
| <b>SUZ12</b>   | Q15022               | SUZ12 polycomb repressive complex 2 subunit                  | 4,78               | 4,19             | PASS    |
| <b>AMPD2</b>   | Q01433               | adenosine monophosphate deaminase 2                          | 4,60               | 5,45             | PASS    |
| <b>JPT2</b>    | H3BMV3               | Jupiter microtubule associated homolog 2                     | 4,51               | 4,36             | PASS    |
| <b>TFG</b>     | Q92734               | trafficking from ER to golgi regulator                       | 4,32               | 6,11             | PASS    |
| <b>BOLA1</b>   | Q9Y3E2               | bolA family member 1                                         | 4,29               | 4,07             | PASS    |
| <b>LCP1</b>    | P13796               | lymphocyte cytosolic protein 1                               | 4,28               | 6,76             | PASS    |
| <b>ANXA6</b>   | P08133               | annexin A6                                                   | 4,19               | 3,79             | PASS    |
| <b>CAST</b>    | A0A0C4DGB5           | calpastatin                                                  | 4,17               | 4,79             | PASS    |
| <b>PLIN3</b>   | O60664               | perilipin 3                                                  | 4,17               | 4,02             | PASS    |
| <b>SMN1</b>    | Q16637               | survival of motor neuron 1, telomeric                        | 4,12               | 5,46             | PASS    |
| <b>MOCS2</b>   | O96007               | molybdenum cofactor synthesis 2                              | 4,09               | 4,52             | PASS    |
| <b>CARHSP1</b> | Q9Y2V2               | calcium regulated heat stable protein 1                      | 4,04               | 5,17             | PASS    |
| <b>APRT</b>    | P07741               | adenine phosphoribosyltransferase                            | 4,04               | 4,78             | PASS    |
| <b>SNX9</b>    | Q9Y5X1               | sorting nexin 9                                              | 3,99               | 4,51             | PASS    |
| <b>CNN2</b>    | B4DDF4               | calponin 2                                                   | 3,99               | 4,05             | PASS    |
| <b>APIP</b>    | Q96GX9               | APAF1 interacting protein                                    | 3,96               | 4,43             | PASS    |
| <b>TAGLN2</b>  | P37802               | transgelin 2                                                 | 3,89               | 4,71             | PASS    |
| <b>FYB1</b>    | O15117               | FYN binding protein 1                                        | 3,85               | 4,59             | PASS    |
| <b>IST1</b>    | H3BMU1               | IST1 factor associated with ESCRT-III                        | 3,80               | 5,55             | PASS    |
| <b>HAUS5</b>   | O94927               | HAUS augmin like complex subunit 5                           | 3,74               | 4,72             | PASS    |
| <b>CHAMP1</b>  | Q96JM3               | chromosome alignment maintaining phosphoprotein 1            | 3,73               | 4,38             | PASS    |
| <b>GBP1</b>    | P32455               | guanylate binding protein 1                                  | 3,73               | 4,27             | PASS    |
| <b>PGP</b>     | A6NDG6               | phosphoglycolate phosphatase                                 | 3,73               | 4,74             | PASS    |
| <b>CCDC88C</b> | Q9P219               | coiled-coil domain containing 88C                            | 3,71               | 4,35             | PASS    |
| <b>TBC1D15</b> | Q8TC07               | TBC1 domain family member 15                                 | 3,69               | 3,71             | PASS    |

|          |            |                                                                              |      |      |      |
|----------|------------|------------------------------------------------------------------------------|------|------|------|
| STAM     | Q92783     | signal transducing adaptor molecule                                          | 3,65 | 5,38 | PASS |
| NEDD1    | Q8NHV4     | NEDD1 gamma-tubulin ring complex targeting factor                            | 3,58 | 4,03 | PASS |
| IMPDH1   | A0A3B3IRL5 | inosine monophosphate dehydrogenase 1                                        | 3,55 | 4,31 | PASS |
| INPP4A   | Q96PE3     | inositol polyphosphate-4-phosphatase type I A                                | 3,51 | 4,71 | PASS |
| ERAP1    | Q9NZ08     | endoplasmic reticulum aminopeptidase 1                                       | 3,51 | 4,16 | PASS |
| RRAS2    | P62070     | RAS related 2                                                                | 3,68 | 4,16 | PASS |
| SESN2    | P58004     | sestrin 2                                                                    | 3,75 | 4,02 | PASS |
| SLC39A14 | Q15043     | solute carrier family 39 member 14                                           | 7,17 | 1,95 | FAIL |
| MTR      | Q99707     | 5-methyltetrahydrofolate-homocysteine methyltransferase                      | 6,36 | 2,06 | FAIL |
| PFDN4    | E9PQY2     | prefoldin subunit 4                                                          | 6,08 | 1,76 | FAIL |
| HCLS1    | P14317     | hematopoietic cell-specific Lyn substrate 1                                  | 6,05 | 2,57 | FAIL |
| ADSS2    | P30520     | adenylosuccinate synthase 2                                                  | 5,99 | 2,40 | FAIL |
| TMOD3    | Q9NYL9     | tropomodulin 3                                                               | 5,74 | 1,85 | FAIL |
| VPS37B   | Q9H9H4     | VPS37B subunit of ESCRT-I                                                    | 5,70 | 2,55 | FAIL |
| ACTN4    | O43707     | actinin alpha 4                                                              | 5,67 | 2,13 | FAIL |
| AARSD1   | Q9BTE6     | alanyl-tRNA synthetase domain containing 1                                   | 5,66 | 1,81 | FAIL |
| SASH3    | O75995     | SAM and SH3 domain containing 3                                              | 5,60 | 2,06 | FAIL |
| LUZP1    | Q86V48     | leucine zipper protein 1                                                     | 5,54 | 2,39 | FAIL |
| IQSEC1   | A0A3B3IRZ4 | IQ motif and Sec7 domain ArfGEF 1                                            | 5,47 | 2,26 | FAIL |
| FRMD4A   | Q9P2Q2     | FERM domain containing 4A                                                    | 5,46 | 1,63 | FAIL |
| CCDC6    | Q16204     | coiled-coil domain containing 6                                              | 5,45 | 2,26 | FAIL |
| STXBP2   | Q15833     | syntaxin binding protein 2                                                   | 5,42 | 3,50 | FAIL |
| SRGAP2   | O75044     | SLIT-ROBO Rho GTPase activating protein 2                                    | 5,36 | 2,41 | FAIL |
| LCP2     | Q13094     | lymphocyte cytosolic protein 2                                               | 5,35 | 1,40 | FAIL |
| NSFL1C   | Q9UNZ2     | NSFL1 cofactor                                                               | 5,34 | 2,43 | FAIL |
| GPHN     | Q9NQX3     | gephyrin                                                                     | 5,33 | 2,84 | FAIL |
| APBB1IP  | Q7Z5R6     | amyloid beta precursor protein binding family B member 1 interacting protein | 5,30 | 2,80 | FAIL |
| LASP1    | Q14847     | LIM and SH3 protein 1                                                        | 5,28 | 1,99 | FAIL |
| PLPBP    | O94903     | pyridoxal phosphate binding protein                                          | 5,22 | 1,81 | FAIL |
| NCOR1    | O75376     | nuclear receptor corepressor 1                                               | 5,20 | 2,34 | FAIL |
| TRPV2    | Q9Y551     | transient receptor potential cation channel subfamily V member 2             | 5,19 | 1,47 | FAIL |
| ADD1     | E7ENY0     | adducin 1                                                                    | 5,17 | 2,80 | FAIL |
| SBF1     | O95248     | SET binding factor 1                                                         | 5,16 | 1,46 | FAIL |
| PFDN6    | O15212     | prefoldin subunit 6                                                          | 5,15 | 2,09 | FAIL |
| ARFGAP3  | Q9NP61     | ADP ribosylation factor GTPase activating protein 3                          | 5,14 | 1,95 | FAIL |
| PTPN11   | Q06124     | protein tyrosine phosphatase non-receptor type 11                            | 5,12 | 2,77 | FAIL |
| UBE2R2   | Q712K3     | ubiquitin conjugating enzyme E2 R2                                           | 5,09 | 2,67 | FAIL |
| EFHD1    | Q9BUP0     | EF-hand domain family member D1                                              | 5,08 | 2,62 | FAIL |
| DCTN2    | Q13561     | dynactin subunit 2                                                           | 5,06 | 2,59 | FAIL |
| MAPRE1   | Q15691     | microtubule associated protein RP/EB family member 1                         | 5,04 | 3,52 | FAIL |
| CEP55    | Q53EZ4     | centrosomal protein 55                                                       | 5,03 | 2,17 | FAIL |
| RIPK1    | Q13546     | receptor interacting serine/threonine kinase 1                               | 5,03 | 2,72 | FAIL |
| TPT1     | Q5W0H4     | tumor protein, translationally-controlled 1                                  | 5,00 | 2,51 | FAIL |
| CACYBP   | Q9HB71     | calcyclin binding protein                                                    | 4,94 | 2,94 | FAIL |

|            |            |                                                                       |      |      |      |
|------------|------------|-----------------------------------------------------------------------|------|------|------|
| SRI        | P30626     | sorcin                                                                | 4,93 | 2,80 | FAIL |
| TPM3       | A0A087WWU8 | tropomyosin 3                                                         | 4,93 | 1,87 | FAIL |
| PAWR       | Q96IZ0     | pro-apoptotic WT1 regulator                                           | 4,91 | 2,10 | FAIL |
| PRPF8      | Q6P2Q9     | pre-mRNA processing factor 8                                          | 4,90 | 1,41 | FAIL |
| PSMD9      | F5H5V4     | proteasome 26S subunit, non-ATPase 9                                  | 4,89 | 1,52 | FAIL |
| STAT5B     | P51692     | signal transducer and activator of transcription 5B                   | 4,87 | 2,87 | FAIL |
| PSMG1      | O95456     | proteasome assembly chaperone 1                                       | 4,85 | 2,61 | FAIL |
| RANBP9     | Q96S59     | RAN binding protein 9                                                 | 4,85 | 2,55 | FAIL |
| GOPC       | Q9HD26     | golgi associated PDZ and coiled-coil motif containing                 | 4,84 | 2,15 | FAIL |
| MED24      | F5H5K2     | mediator complex subunit 24                                           | 4,83 | 2,85 | FAIL |
| DPYSL2     | A0A1C7CYX9 | dihydropyrimidinase like 2                                            | 4,80 | 2,12 | FAIL |
| TNKS1BP1   | Q9C0C2     | tankyrase 1 binding protein 1                                         | 4,79 | 2,21 | FAIL |
|            | F6TLX2     |                                                                       | 4,78 | 2,45 | FAIL |
| ATP7A      | Q04656     | ATPase copper transporting alpha                                      | 4,78 | 3,31 | FAIL |
| NFATC3     | H3BRS1     | nuclear factor of activated T cells 3                                 | 4,76 | 2,60 | FAIL |
| WBP2       | Q969T9     | WW domain binding protein 2                                           | 4,76 | 1,89 | FAIL |
| SMYD5      | Q6GMV2     | SMYD family member 5                                                  | 4,76 | 2,32 | FAIL |
| DSTN       | F6RFD5     | destrin, actin depolymerizing factor                                  | 4,75 | 2,94 | FAIL |
| UXT        | Q9UBK9     | ubiquitously expressed prefoldin like chaperone                       | 4,74 | 1,35 | FAIL |
| PBK        | Q96KB5     | PDZ binding kinase                                                    | 4,72 | 2,49 | FAIL |
| PLCB3      | Q01970     | phospholipase C beta 3                                                | 4,70 | 1,50 | FAIL |
| EIF4B      | E7EX17     | eukaryotic translation initiation factor 4B                           | 4,69 | 2,10 | FAIL |
| CASP2      | P42575     | caspase 2                                                             | 4,66 | 1,65 | FAIL |
| KCNAB2     | A0A5F9UN28 | potassium voltage-gated channel subfamily A regulatory beta subunit 2 | 4,64 | 1,87 | FAIL |
| DNMBP      | Q6XZF7     | dynamitin binding protein                                             | 4,64 | 2,34 | FAIL |
| PJA2       | O43164     | praja ring finger ubiquitin ligase 2                                  | 4,62 | 1,99 | FAIL |
| CIAPIN1    | Q6FI81     | cytokine induced apoptosis inhibitor 1                                | 4,61 | 2,66 | FAIL |
| RABGAP1L   | Q5R372     | RAB GTPase activating protein 1 like                                  | 4,60 | 2,35 | FAIL |
| PNPO       | J3QQZ9     | pyridoxamine 5'-phosphate oxidase                                     | 4,60 | 2,04 | FAIL |
| NSMCE1     | Q8WV22     | NSE1 homolog, SMC5-SMC6 complex component                             | 4,59 | 2,79 | FAIL |
| TPM3       | J3KN67     | tropomyosin 3                                                         | 4,59 | 2,03 | FAIL |
| TNIP1      | Q15025     | TNFAIP3 interacting protein 1                                         | 4,58 | 3,01 | FAIL |
| PMF1-BGLAP | A0A087WT04 | PMF1-BGLAP readthrough                                                | 4,57 | 1,87 | FAIL |
| MVB12A     | Q96EY5     | multivesicular body subunit 12A                                       | 4,57 | 2,84 | FAIL |
| CLSPN      | Q9HAW4     | claspin                                                               | 4,54 | 1,80 | FAIL |
| NT5DC1     | Q5TFE4     | 5'-nucleotidase domain containing 1                                   | 4,52 | 1,94 | FAIL |
| WWP2       | O00308     | WW domain containing E3 ubiquitin protein ligase 2                    | 4,51 | 1,97 | FAIL |
|            | E9PL57     |                                                                       | 4,51 | 1,47 | FAIL |
| PDLIM2     | Q96JY6     | PDZ and LIM domain 2                                                  | 4,47 | 2,57 | FAIL |
| MITD1      | H7C3Q6     | microtubule interacting and trafficking domain containing 1           | 4,47 | 2,64 | FAIL |
| TBCB       | A0A494C0X0 | tubulin folding cofactor B                                            | 4,46 | 2,14 | FAIL |
| ALDOC      | P09972     | aldolase, fructose-bisphosphate C                                     | 4,45 | 2,23 | FAIL |
| NDUFS1     | P28331     | NADH:ubiquinone oxidoreductase core subunit S1                        | 4,44 | 1,78 | FAIL |
| TANGO6     | Q9C0B7     | transport and golgi organization 6 homolog                            | 4,44 | 1,96 | FAIL |
| GIMAP7     | Q8NHV1     | GTPase, IMAP family member 7                                          | 4,43 | 2,23 | FAIL |

|         |            |                                                          |      |      |      |
|---------|------------|----------------------------------------------------------|------|------|------|
| NSUN6   | Q8TEA1     | NOP2/Sun RNA methyltransferase 6                         | 4,43 | 1,43 | FAIL |
| FERMT2  | H0YJ34     | FERM domain containing kindlin 2                         | 4,43 | 2,46 | FAIL |
| DHX16   | O60231     | DEAH-box helicase 16                                     | 4,43 | 2,95 | FAIL |
| ACTN1   | P12814     | actinin alpha 1                                          | 4,42 | 2,54 | FAIL |
| ADD3    | Q9UEY8     | adducin 3                                                | 4,42 | 2,45 | FAIL |
| CORO1C  | Q9ULV4     | coronin 1C                                               | 4,40 | 1,97 | FAIL |
| FTSJ3   | Q8IY81     | FtsJ RNA 2'-O-methyltransferase 3                        | 4,40 | 2,51 | FAIL |
| MACO1   | Q8N5G2     | macoilin 1                                               | 4,39 | 1,80 | FAIL |
| PDCD5   | O14737     | programmed cell death 5                                  | 4,39 | 1,94 | FAIL |
| TBCE    | Q15813     | tubulin folding cofactor E                               | 4,38 | 2,90 | FAIL |
| PLCG1   | P19174     | phospholipase C gamma 1                                  | 4,37 | 2,20 | FAIL |
| FKBP15  | Q5T1M5     | FKBP prolyl isomerase family member 15                   | 4,37 | 2,01 | FAIL |
| EIF4A2  | Q14240     | eukaryotic translation initiation factor 4A2             | 4,37 | 1,73 | FAIL |
| ANKRD52 | Q8NB46     | ankyrin repeat domain 52                                 | 4,36 | 2,27 | FAIL |
|         | L0R819     |                                                          | 4,36 | 3,01 | FAIL |
| ASMTL   | O95671     | acetylserotonin O-methyltransferase like                 | 4,36 | 1,51 | FAIL |
| TBC1D17 | Q9HA65     | TBC1 domain family member 17                             | 4,35 | 3,09 | FAIL |
| TSN     | Q15631     | translin                                                 | 4,34 | 2,01 | FAIL |
| CTU2    | H3BSW6     | cytosolic thiouridylase subunit 2                        | 4,31 | 1,39 | FAIL |
| FHIP2A  | Q5W0V3     | FHF complex subunit HOOK interacting protein 2A          | 4,30 | 2,56 | FAIL |
| DBNL    | Q9UJU6     | drebrin like                                             | 4,29 | 2,60 | FAIL |
| FAT1    | Q14517     | FAT atypical cadherin 1                                  | 4,28 | 2,46 | FAIL |
| FAF1    | Q9UNN5     | Fas associated factor 1                                  | 4,27 | 2,41 | FAIL |
| GYPC    | P04921     | glycophorin C (Gerbich blood group)                      | 4,26 | 1,55 | FAIL |
| DUT     | P33316     | deoxyuridine triphosphatase                              | 4,25 | 2,34 | FAIL |
| PM20D2  | Q8IYS1     | peptidase M20 domain containing 2                        | 4,23 | 2,28 | FAIL |
| SLC4A7  | H7C3C4     | solute carrier family 4 member 7                         | 4,20 | 3,52 | FAIL |
| UCHL5   | Q5LJA5     | ubiquitin C-terminal hydrolase L5                        | 4,20 | 3,25 | FAIL |
| VASP    | P50552     | vasodilator stimulated phosphoprotein                    | 4,20 | 2,72 | FAIL |
| PPP4R3A | Q6IN85     | protein phosphatase 4 regulatory subunit 3A              | 4,20 | 1,57 | FAIL |
| ATG4B   | Q9Y4P1     | autophagy related 4B cysteine peptidase                  | 4,18 | 1,42 | FAIL |
|         | A0A087WZK9 |                                                          | 4,18 | 2,55 | FAIL |
| TTC1    | Q99614     | tetratricopeptide repeat domain 1                        | 4,18 | 2,04 | FAIL |
| SPC25   | Q9HBM1     | SPC25 component of NDC80 kinetochore complex             | 4,18 | 3,52 | FAIL |
| ADO     | Q96SZ5     | 2-aminoethanethiol dioxygenase                           | 4,17 | 2,28 | FAIL |
| CBX5    | P45973     | chromobox 5                                              | 4,16 | 2,27 | FAIL |
| SASS6   | Q6UVJ0     | SAS-6 centriolar assembly protein                        | 4,16 | 1,92 | FAIL |
| PPP1R9B | Q96SB3     | protein phosphatase 1 regulatory subunit 9B              | 4,16 | 1,92 | FAIL |
| HDGF    | P51858     | heparin binding growth factor                            | 4,16 | 1,44 | FAIL |
| DCP1B   | Q8IZD4     | decapping mRNA 1B                                        | 4,15 | 2,78 | FAIL |
| IKBKB   | O14920     | inhibitor of nuclear factor kappa B kinase subunit beta  | 4,15 | 2,04 | FAIL |
| CASKIN2 | Q8WXE0     | CASK interacting protein 2                               | 4,15 | 2,78 | FAIL |
| TSG101  | F5H442     | tumor susceptibility 101                                 | 4,14 | 3,03 | FAIL |
| DLG1    | Q12959     | discs large MAGUK scaffold protein 1                     | 4,14 | 2,03 | FAIL |
| RAPGEF1 | Q13905     | Rap guanine nucleotide exchange factor 1                 | 4,13 | 3,20 | FAIL |
| VBP1    | P61758     | VHL binding protein 1                                    | 4,13 | 2,37 | FAIL |
| SPTAN1  | Q13813     | spectrin alpha, non-erythrocytic 1                       | 4,12 | 2,90 | FAIL |
| LRSAM1  | A0A6Q8PFL5 | leucine rich repeat and sterile alpha motif containing 1 | 4,12 | 1,82 | FAIL |

|          |        |                                                                          |      |      |      |
|----------|--------|--------------------------------------------------------------------------|------|------|------|
| MSL1     | Q68DK7 | MSL complex subunit 1                                                    | 4,11 | 2,37 | FAIL |
| SULF2    | Q8IWU5 | sulfatase 2                                                              | 4,11 | 2,12 | FAIL |
| CDC73    | Q6P1J9 | cell division cycle 73                                                   | 4,11 | 1,56 | FAIL |
| SPART    | Q8N0X7 | spartin                                                                  | 4,11 | 2,70 | FAIL |
| PTPN23   | Q9H3S7 | protein tyrosine phosphatase non-receptor type 23                        | 4,08 | 3,40 | FAIL |
| MTPN     | P58546 | myotrophin                                                               | 4,08 | 2,24 | FAIL |
| HECTD3   | Q5T447 | HECT domain E3 ubiquitin protein ligase 3                                | 4,06 | 2,07 | FAIL |
| TSPYL5   | Q86VY4 | TSPY like 5                                                              | 4,05 | 2,07 | FAIL |
| STIM2    | Q9P246 | stromal interaction molecule 2                                           | 4,04 | 1,43 | FAIL |
| SLC39A10 | Q9ULF5 | solute carrier family 39 member 10                                       | 4,04 | 2,12 | FAIL |
| CAP1     | Q01518 | cyclase associated actin cytoskeleton regulatory protein 1               | 4,04 | 2,15 | FAIL |
| ZC3HC1   | Q86WB0 | zinc finger C3HC-type containing 1                                       | 4,03 | 3,46 | FAIL |
| GAPDH    | P04406 | glyceraldehyde-3-phosphate dehydrogenase                                 | 4,02 | 2,31 | FAIL |
| PRAG1    | Q86YV5 | PEAK1 related, kinase-activating pseudokinase 1                          | 4,02 | 2,65 | FAIL |
| MTMR12   | Q9C0I1 | myotubularin related protein 12                                          | 4,02 | 2,99 | FAIL |
| DNAJC2   | Q99543 | DnaJ heat shock protein family (Hsp40) member C2                         | 4,01 | 2,39 | FAIL |
| CSTB     | P04080 | cystatin B                                                               | 4,01 | 1,32 | FAIL |
| LARP7    | Q4G0J3 | La ribonucleoprotein 7, transcriptional regulator                        | 4,01 | 3,11 | FAIL |
| RNF31    | Q96EP0 | ring finger protein 31                                                   | 4,00 | 2,24 | FAIL |
| VAMP5    | O95183 | vesicle associated membrane protein 5                                    | 3,99 | 2,24 | FAIL |
| OBI1     | Q5W0B1 | ORC ubiquitin ligase 1                                                   | 3,99 | 2,15 | FAIL |
| NISCH    | Q9Y2I1 | nischarin                                                                | 3,99 | 3,29 | FAIL |
| JMJD6    | B2WTI3 | jumonji domain containing 6, arginine demethylase and lysine hydroxylase | 3,99 | 1,37 | FAIL |
| PPA1     | Q15181 | inorganic pyrophosphatase 1                                              | 3,98 | 1,99 | FAIL |
| NAA30    | Q147X3 | N-alpha-acetyltransferase 30, NatC catalytic subunit                     | 3,97 | 1,86 | FAIL |
| SMPD3    | Q9NY59 | sphingomyelin phosphodiesterase 3                                        | 3,97 | 2,08 | FAIL |
| SLC25A40 | Q8TBP6 | solute carrier family 25 member 40                                       | 3,96 | 2,09 | FAIL |
| FASTKD5  | Q7L8L6 | FAST kinase domains 5                                                    | 3,96 | 1,45 | FAIL |
| FNBP1    | B7ZL14 | formin binding protein 1                                                 | 3,96 | 2,85 | FAIL |
| CSRP1    | E9PP21 | cysteine and glycine rich protein 1                                      | 3,95 | 2,48 | FAIL |
| ECSIT    | Q9BQ95 | ECSIT signaling integrator                                               | 3,94 | 1,56 | FAIL |
| SNAP23   | O00161 | synaptosome associated protein 23                                        | 3,94 | 2,60 | FAIL |
| UBR7     | Q8N806 | ubiquitin protein ligase E3 component n-recogin 7                        | 3,93 | 1,94 | FAIL |
| AFG2B    | Q9BVQ7 | AFG2 AAA ATPase homolog B                                                | 3,93 | 2,17 | FAIL |
| GLE1     | Q53GS7 | GLE1 RNA export mediator                                                 | 3,92 | 2,82 | FAIL |
| PCYT2    | Q99447 | phosphate cytidyltransferase 2, ethanolamine                             | 3,92 | 2,81 | FAIL |
| PPIP5K2  | O43314 | diphosphoinositol pentakisphosphate kinase 2                             | 3,92 | 2,43 | FAIL |
| RNPEP    | A6NKB8 | arginyl aminopeptidase                                                   | 3,92 | 1,88 | FAIL |
| ERBIN    | Q96RT1 | erbB2 interacting protein                                                | 3,92 | 2,66 | FAIL |
| EIF2B2   | P49770 | eukaryotic translation initiation factor 2B subunit beta                 | 3,92 | 1,91 | FAIL |
| EPHB2    | B1AKC9 | EPH receptor B2                                                          | 3,91 | 2,04 | FAIL |
| RPAP3    | Q9H6T3 | RNA polymerase II associated protein 3                                   | 3,90 | 2,10 | FAIL |
| ARHGAP25 | P42331 | Rho GTPase activating protein 25                                         | 3,89 | 1,49 | FAIL |
| DOK2     | O60496 | docking protein 2                                                        | 3,89 | 2,83 | FAIL |
| GEMIN8   | Q9NWZ8 | gem nuclear organelle associated protein 8                               | 3,88 | 2,50 | FAIL |

|         |            |                                                                                                      |      |      |      |
|---------|------------|------------------------------------------------------------------------------------------------------|------|------|------|
| STK10   | O94804     | serine/threonine kinase 10                                                                           | 3,87 | 2,06 | FAIL |
| PRMT1   | E9PKG1     | protein arginine methyltransferase 1                                                                 | 3,87 | 2,93 | FAIL |
| SH3GL1  | Q99961     | SH3 domain containing GRB2 like 1, endophilin A2                                                     | 3,86 | 3,48 | FAIL |
| BIRC6   | Q9NR09     | baculoviral IAP repeat containing 6                                                                  | 3,86 | 2,65 | FAIL |
| EPB41L2 | H0Y5B0     | erythrocyte membrane protein band 4.1 like 2                                                         | 3,86 | 1,96 | FAIL |
| SPTBN2  | O15020     | spectrin beta, non-erythrocytic 2                                                                    | 3,85 | 2,09 | FAIL |
| WDR26   | A0A499FIZ0 | WD repeat domain 26                                                                                  | 3,84 | 2,36 | FAIL |
| HIRA    | P54198     | histone cell cycle regulator                                                                         | 3,84 | 2,05 | FAIL |
| MON2    | A0A286YFF8 | MON2 homolog, regulator of endosome-to-Golgi trafficking                                             | 3,83 | 2,86 | FAIL |
| PAICS   | P22234     | phosphoribosylaminoimidazole carboxylase and phosphoribosylaminoimidazolesuccinocarboxamide synthase | 3,82 | 3,23 | FAIL |
| BRK1    | Q8WUW1     | BRICK1 subunit of SCAR/WAVE actin nucleating complex                                                 | 3,81 | 2,80 | FAIL |
| PFN1    | P07737     | profilin 1                                                                                           | 3,81 | 2,34 | FAIL |
| PACSIN2 | Q9UNF0     | protein kinase C and casein kinase substrate in neurons 2                                            | 3,81 | 2,72 | FAIL |
| UFC1    | Q9Y3C8     | ubiquitin-fold modifier conjugating enzyme 1                                                         | 3,80 | 2,82 | FAIL |
| RTF2    | A0A0A0MQR2 | replication termination factor 2                                                                     | 3,80 | 1,70 | FAIL |
| COG4    | J3KNI1     | component of oligomeric golgi complex 4                                                              | 3,80 | 2,07 | FAIL |
| HSD17B7 | P56937     | hydroxysteroid 17-beta dehydrogenase 7                                                               | 3,80 | 2,41 | FAIL |
| PPP5C   | H0YDU8     | protein phosphatase 5 catalytic subunit                                                              | 3,79 | 2,43 | FAIL |
| HPF1    | Q9NWX4     | histone PARylation factor 1                                                                          | 3,79 | 1,61 | FAIL |
| PFDN2   | Q9UHV9     | prefoldin subunit 2                                                                                  | 3,78 | 2,39 | FAIL |
| FCHO1   | O14526     | FCH and mu domain containing endocytic adaptor 1                                                     | 3,78 | 1,70 | FAIL |
| EPB41   | P11171     | erythrocyte membrane protein band 4.1                                                                | 3,78 | 2,84 | FAIL |
| CASP8   | Q14790     | caspase 8                                                                                            | 3,78 | 2,30 | FAIL |
| CBLB    | Q13191     | Cbl proto-oncogene B                                                                                 | 3,77 | 1,31 | FAIL |
| ABHD12  | Q8N2K0     | abhydrolase domain containing 12, lysophospholipase                                                  | 3,77 | 1,88 | FAIL |
| REL     | Q04864     | REL proto-oncogene, NF-kB subunit                                                                    | 3,76 | 3,32 | FAIL |
| C5      | P01031     | complement C5                                                                                        | 3,76 | 1,41 | FAIL |
| LPXN    | O60711     | leupaxin                                                                                             | 3,76 | 2,02 | FAIL |
| MAT2A   | P31153     | methionine adenosyltransferase 2A                                                                    | 3,76 | 1,94 | FAIL |
| DYNC1I2 | Q13409     | dynein cytoplasmic 1 intermediate chain 2                                                            | 3,75 | 2,75 | FAIL |
| RRM1    | P23921     | ribonucleotide reductase catalytic subunit M1                                                        | 3,74 | 1,90 | FAIL |
| EEF1B2  | P24534     | eukaryotic translation elongation factor 1 beta 2                                                    | 3,74 | 2,48 | FAIL |
| WASF1   | Q92558     | WASP family member 1                                                                                 | 3,74 | 1,90 | FAIL |
| RPP38   | P78345     | ribonuclease P/MRP subunit p38                                                                       | 3,73 | 1,84 | FAIL |
| TTI2    | E5RIH5     | TELO2 interacting protein 2                                                                          | 3,73 | 2,29 | FAIL |
| CNNM4   | Q6P4Q7     | cyclin and CBS domain divalent metal cation transport mediator 4                                     | 3,73 | 3,59 | FAIL |
| UACA    | H0YNH8     | uveal autoantigen with coiled-coil domains and ankyrin repeats                                       | 3,72 | 1,76 | FAIL |
| PPFIA1  | Q13136     | PTPRF interacting protein alpha 1                                                                    | 3,72 | 1,82 | FAIL |
| HNRNPDL | O14979     | heterogeneous nuclear ribonucleoprotein D like                                                       | 3,72 | 2,93 | FAIL |
| MORF4L2 | Q5JXX2     | mortality factor 4 like 2                                                                            | 3,72 | 1,51 | FAIL |

|             |            |                                                                             |      |      |      |
|-------------|------------|-----------------------------------------------------------------------------|------|------|------|
| XPNPEP1     | Q9NQW7     | X-prolyl aminopeptidase 1                                                   | 3,71 | 2,31 | FAIL |
| CHORDC1     | Q9UHD1     | cysteine and histidine rich domain containing 1                             | 3,70 | 2,29 | FAIL |
| STAU1       | O95793     | staufen double-stranded RNA binding protein 1                               | 3,70 | 3,50 | FAIL |
| KNL1        | Q8NG31     | kinetochore scaffold 1                                                      | 3,69 | 1,75 | FAIL |
| ARHGEF18    | A0A087WZG4 | Rho/Rac guanine nucleotide exchange factor 18                               | 3,69 | 2,39 | FAIL |
| EMSY        | Q7Z589     | EMSY transcriptional repressor, BRCA2 interacting                           | 3,68 | 2,02 | FAIL |
| EZR         | P15311     | ezrin                                                                       | 3,68 | 2,57 | FAIL |
| ATP6V0D1    | F5GYQ1     | ATPase H <sup>+</sup> transporting V0 subunit d1                            | 3,68 | 3,53 | FAIL |
| MAP3K7      | O43318     | mitogen-activated protein kinase kinase kinase 7                            | 3,68 | 1,75 | FAIL |
| CHURC1-FNTB | P49356     | CHURC1-FNTB readthrough                                                     | 3,67 | 3,36 | FAIL |
| CCP110      | O43303     | centriolar coiled-coil protein 110                                          | 3,67 | 2,38 | FAIL |
| ARHGDIA     | P52565     | Rho GDP dissociation inhibitor alpha                                        | 3,67 | 1,49 | FAIL |
| ECHDC1      | Q9NTX5     | ethylmalonyl-CoA decarboxylase 1                                            | 3,66 | 2,32 | FAIL |
| RANBP3      | Q9H6Z4     | RAN binding protein 3                                                       | 3,65 | 2,16 | FAIL |
| SGPP1       | Q9BX95     | sphingosine-1-phosphate phosphatase 1                                       | 3,64 | 1,56 | FAIL |
| PRUNE1      | Q86TP1     | prune exopolyphosphatase 1                                                  | 3,63 | 1,37 | FAIL |
| NDUFB8      | O95169     | NADH:ubiquinone oxidoreductase subunit B8                                   | 3,63 | 2,19 | FAIL |
| USP9X       | Q93008     | ubiquitin specific peptidase 9 X-linked                                     | 3,62 | 2,08 | FAIL |
| TMF1        | P82094     | TATA element modulatory factor 1                                            | 3,62 | 1,69 | FAIL |
| DRG2        | P55039     | developmentally regulated GTP binding protein 2                             | 3,61 | 2,08 | FAIL |
| TLN1        | Q9Y490     | talin 1                                                                     | 3,60 | 2,42 | FAIL |
| GOLGA3      | Q08378     | golgin A3                                                                   | 3,60 | 2,09 | FAIL |
| KLC2        | Q9H0B6     | kinesin light chain 2                                                       | 3,60 | 2,35 | FAIL |
| DCK         | P27707     | deoxycytidine kinase                                                        | 3,60 | 1,61 | FAIL |
| FAM162A     | F8W7Q4     | family with sequence similarity 162 member A                                | 3,60 | 1,85 | FAIL |
| NFX1        | Q12986     | nuclear transcription factor, X-box binding 1                               | 3,59 | 2,28 | FAIL |
| ADI1        | Q9BV57     | acireductone dioxygenase 1                                                  | 3,59 | 1,69 | FAIL |
| RNGTT       | O60942     | RNA guanylyltransferase and 5'-phosphatase                                  | 3,58 | 1,58 | FAIL |
| CASP3       | C9JXR7     | caspase 3                                                                   | 3,58 | 2,69 | FAIL |
| OIP5        | O43482     | Opa interacting protein 5                                                   | 3,58 | 3,06 | FAIL |
| YWHAB       | P31946     | tyrosine 3-monooxygenase/tryptophan 5-monooxygenase activation protein beta | 3,58 | 2,03 | FAIL |
| RABGGTB     | Q5T4U8     | Rab geranylgeranyltransferase subunit beta                                  | 3,57 | 2,15 | FAIL |
| NF1         | P21359     | neurofibromin 1                                                             | 3,57 | 1,62 | FAIL |
| AGFG1       | P52594     | ArfGAP with FG repeats 1                                                    | 3,57 | 2,13 | FAIL |
| TAPBP       | A0A0G2JH37 | TAP binding protein                                                         | 3,56 | 1,53 | FAIL |
| STK3        | Q13188     | serine/threonine kinase 3                                                   | 3,56 | 2,81 | FAIL |
| EIF4G3      | A0A0U1RQK7 | eukaryotic translation initiation factor 4 gamma 3                          | 3,56 | 1,92 | FAIL |
| TRIP12      | A0A6Q8PHK0 | thyroid hormone receptor interactor 12                                      | 3,55 | 2,56 | FAIL |
| SKA3        | Q8IX90     | spindle and kinetochore associated complex subunit 3                        | 3,54 | 2,37 | FAIL |
| NFKB1       | P19838     | nuclear factor kappa B subunit 1                                            | 3,54 | 3,11 | FAIL |
| BID         | P55957     | BH3 interacting domain death agonist                                        | 3,54 | 2,01 | FAIL |
| ANKS1A      | A0A3B3ISP1 | ankyrin repeat and sterile alpha motif domain containing 1A                 | 3,54 | 1,78 | FAIL |
| PPAT        | Q06203     | phosphoribosyl pyrophosphate amidotransferase                               | 3,54 | 1,68 | FAIL |
| CNOT10      | Q9H9A5     | CCR4-NOT transcription complex subunit 10                                   | 3,54 | 2,08 | FAIL |

|            |            |                                                                                |      |      |      |
|------------|------------|--------------------------------------------------------------------------------|------|------|------|
| RRAGA      | Q7L523     | Ras related GTP binding A                                                      | 3,53 | 2,00 | FAIL |
| EVL        | Q9UI08     | Enah/Vasp-like                                                                 | 3,53 | 2,39 | FAIL |
| MED27      | A0A494C0P0 | mediator complex subunit 27                                                    | 3,53 | 1,83 | FAIL |
| INTS8      | Q75QN2     | integrator complex subunit 8                                                   | 3,53 | 1,41 | FAIL |
| EFHD2      | Q96C19     | EF-hand domain family member D2                                                | 3,53 | 3,06 | FAIL |
| GRAMD4     | Q6IC98     | GRAM domain containing 4                                                       | 3,53 | 1,75 | FAIL |
| CEP43      | O95684     | centrosomal protein 43                                                         | 3,53 | 2,10 | FAIL |
| IRF2BPL    | Q9H1B7     | interferon regulatory factor 2 binding protein like                            | 3,52 | 3,31 | FAIL |
| EPB41L2    | O43491     | erythrocyte membrane protein band 4.1 like 2                                   | 3,52 | 2,54 | FAIL |
| RNASEH2C   | E9PN81     | ribonuclease H2 subunit C                                                      | 3,52 | 3,07 | FAIL |
| AIP        | O00170     | aryl hydrocarbon receptor interacting protein                                  | 3,52 | 2,84 | FAIL |
| CALCOCO1   | Q9P1Z2     | calcium binding and coiled-coil domain 1                                       | 3,51 | 1,87 | FAIL |
| CRACR2A    | Q9BSW2     | calcium release activated channel regulator 2A                                 | 3,51 | 2,28 | FAIL |
| UBE2Q1     | Q7Z7E8     | ubiquitin conjugating enzyme E2 Q1                                             | 3,51 | 1,57 | FAIL |
| ZBED4      | O75132     | zinc finger BED-type containing 4                                              | 3,51 | 2,87 | FAIL |
| COPS6      | E7EM64     | COP9 signalosome subunit 6                                                     | 3,51 | 1,91 | FAIL |
| ANXA11     | P50995     | annexin A11                                                                    | 3,51 | 2,53 | FAIL |
| GTF3C6     | Q969F1     | general transcription factor IIIC subunit 6                                    | 3,50 | 1,36 | FAIL |
| GAB2       | Q9UQC2     | GRB2 associated binding protein 2                                              | 3,50 | 2,98 | FAIL |
| PFKFB2     | O60825     | 6-phosphofructo-2-kinase/fructose-2,6-biphosphatase 2                          | 3,50 | 1,78 | FAIL |
| DGKQ       | P52824     | diacylglycerol kinase theta                                                    | 3,50 | 2,50 | FAIL |
| CDK13      | A0A2R8Y7W5 | cyclin dependent kinase 13                                                     | 3,49 | 2,14 | FAIL |
| ANXA7      | P20073     | annexin A7                                                                     | 3,49 | 5,37 | FAIL |
| HSPH1      | Q92598     | heat shock protein family H (Hsp110) member 1                                  | 3,49 | 2,07 | FAIL |
| RFX7       | Q2KHR2     | regulatory factor X7                                                           | 3,49 | 2,85 | FAIL |
| LRBA       | A0A494C1L5 | LPS responsive beige-like anchor protein                                       | 3,49 | 2,07 | FAIL |
| TACC3      | Q9Y6A5     | transforming acidic coiled-coil containing protein 3                           | 3,49 | 3,28 | FAIL |
| PALM2AKAP2 | Q9Y2D5     | PALM2 and AKAP2 fusion                                                         | 3,48 | 5,64 | FAIL |
| YWHAЕ      | P62258     | tyrosine 3-monooxygenase/tryptophan 5-monooxygenase activation protein epsilon | 3,48 | 5,19 | FAIL |
| ARFGAP1    | Q8N6T3     | ADP ribosylation factor GTPase activating protein 1                            | 3,48 | 3,04 | FAIL |
| PTDSS1     | P48651     | phosphatidylserine synthase 1                                                  | 3,48 | 1,69 | FAIL |
| PEX19      | Q5QNY5     | peroxisomal biogenesis factor 19                                               | 3,47 | 2,08 | FAIL |
| NUP43      | Q8NFB3     | nucleoporin 43                                                                 | 3,47 | 2,03 | FAIL |
| ARHGEF6    | Q15052     | Rac/Cdc42 guanine nucleotide exchange factor 6                                 | 3,47 | 2,68 | FAIL |
| ARID5B     | Q14865     | AT-rich interaction domain 5B                                                  | 3,46 | 1,76 | FAIL |
| MTSS2      | Q765P7     | MTSS I-BAR domain containing 2                                                 | 3,46 | 2,84 | FAIL |
| ARID4B     | Q4LE39     | AT-rich interaction domain 4B                                                  | 3,46 | 4,05 | FAIL |
| GGNBP2     | Q9H3C7     | gametogenetin binding protein 2                                                | 3,45 | 1,78 | FAIL |
|            | A0A087WUC6 |                                                                                | 3,45 | 3,22 | FAIL |
| SSBP3      | Q9BWW4     | single stranded DNA binding protein 3                                          | 3,45 | 2,53 | FAIL |
| MFN1       | Q8IWA4     | mitofusin 1                                                                    | 3,45 | 1,42 | FAIL |
| PRPSAP1    | Q14558     | phosphoribosyl pyrophosphate synthetase associated protein 1                   | 3,44 | 1,80 | FAIL |
| PARN       | A0A494C0W0 | poly(A)-specific ribonuclease                                                  | 3,44 | 2,66 | FAIL |
| KIF14      | Q15058     | kinesin family member 14                                                       | 3,44 | 1,59 | FAIL |



|          |            |                                                       |      |      |      |
|----------|------------|-------------------------------------------------------|------|------|------|
| PIP4K2B  | P78356     | phosphatidylinositol-5-phosphate 4-kinase type 2 beta | 3,44 | 2,46 | FAIL |
| PSME3IP1 | H3BTP8     | proteasome activator subunit 3 interacting protein 1  | 3,43 | 1,84 | FAIL |
| ATG3     | Q9NT62     | autophagy related 3                                   | 3,43 | 2,53 | FAIL |
| CD5      | P06127     | CD5 molecule                                          | 3,43 | 4,87 | FAIL |
| CYTH4    | Q9UIA0     | cytohesin 4                                           | 3,43 | 2,22 | FAIL |
| UBA5     | Q9GZZ9     | ubiquitin like modifier activating enzyme 5           | 3,43 | 2,66 | FAIL |
| BAP1     | F8W6N3     | BRCA1 associated protein 1                            | 3,43 | 3,01 | FAIL |
| PEF1     | Q9UBV8     | penta-EF-hand domain containing 1                     | 3,43 | 2,41 | FAIL |
| MAGED1   | Q9Y5V3     | MAGE family member D1                                 | 3,42 | 3,50 | FAIL |
| SEPTIN6  | Q14141     | septin 6                                              | 3,42 | 2,83 | FAIL |
| CEP85    | Q6P2H3     | centrosomal protein 85                                | 3,42 | 1,50 | FAIL |
| XRCC4    | Q13426     | X-ray repair cross complementing 4                    | 3,42 | 2,10 | FAIL |
| ANKRD44  | Q8N8A2     | ankyrin repeat domain 44                              | 3,42 | 1,81 | FAIL |
| DSN1     | Q9H410     | DSN1 component of MIS12 kinetochore complex           | 3,42 | 2,15 | FAIL |
| TFCP2    | Q12800     | transcription factor CP2                              | 3,41 | 1,80 | FAIL |
| ITPRID2  | E9PHV5     | ITPR interacting domain containing 2                  | 3,41 | 3,43 | FAIL |
| BPNT1    | O95861     | 3'(2'), 5'-bisphosphate nucleotidase 1                | 3,41 | 3,64 | FAIL |
| RASSF5   | Q8TEK8     | Ras association domain family member 5                | 3,40 | 3,36 | FAIL |
| UBA6     | A0AVT1     | ubiquitin like modifier activating enzyme 6           | 3,40 | 2,62 | FAIL |
| POP4     | O95707     | POP4 homolog, ribonuclease P/MRP subunit              | 3,40 | 1,50 | FAIL |
| VPS28    | Q9UK41     | VPS28 subunit of ESCRT-I                              | 3,40 | 2,27 | FAIL |
| TRAF2    | Q12933     | TNF receptor associated factor 2                      | 3,40 | 2,54 | FAIL |
| HAUS7    | Q99871     | HAUS augmin like complex subunit 7                    | 3,39 | 2,15 | FAIL |
| USP32    | Q8NFA0     | ubiquitin specific peptidase 32                       | 3,39 | 1,95 | FAIL |
| STRAP    | Q9Y3F4     | serine/threonine kinase receptor associated protein   | 3,39 | 2,69 | FAIL |
| ELP6     | Q0PNE2     | elongator acetyltransferase complex subunit 6         | 3,39 | 4,46 | FAIL |
| CMTR1    | Q8N1G2     | cap methyltransferase 1                               | 3,38 | 2,18 | FAIL |
| ZNF444   | Q8N0Y2     | zinc finger protein 444                               | 3,38 | 2,84 | FAIL |
| ELP5     | Q8TE02     | elongator acetyltransferase complex subunit 5         | 3,37 | 1,98 | FAIL |
| GPN3     | Q9UHW5     | GPN-loop GTPase 3                                     | 3,37 | 1,33 | FAIL |
| PNMA2    | Q9UL42     | PNMA family member 2                                  | 3,37 | 1,60 | FAIL |
| C10orf88 | Q9H8K7     | chromosome 10 open reading frame 88                   | 3,36 | 2,47 | FAIL |
| CDCA5    | B5MBX0     | cell division cycle associated 5                      | 3,36 | 2,03 | FAIL |
| BRD3     | Q15059     | bromodomain containing 3                              | 3,35 | 1,65 | FAIL |
| CLUH     | O75153     | clustered mitochondria homolog                        | 3,34 | 3,37 | FAIL |
| DOCK7    | Q96N67     | dedicator of cytokinesis 7                            | 3,34 | 1,73 | FAIL |
| MED12    | Q93074     | mediator complex subunit 12                           | 3,34 | 2,57 | FAIL |
| PKN1     | Q16512     | protein kinase N1                                     | 3,34 | 2,61 | FAIL |
| ARHGAP30 | Q7Z6I6     | Rho GTPase activating protein 30                      | 3,34 | 3,28 | FAIL |
| MKLN1    | Q9UL63     | muskelin 1                                            | 3,34 | 2,39 | FAIL |
| DNAJC21  | Q5F1R6     | DnaJ heat shock protein family (Hsp40) member C21     | 3,34 | 1,44 | FAIL |
| PRDX5    | P30044     | peroxiredoxin 5                                       | 3,34 | 1,41 | FAIL |
| RABGEF1  | E9PFK9     | RAB guanine nucleotide exchange factor 1              | 3,34 | 2,40 | FAIL |
| SQSTM1   | Q13501     | sequestosome 1                                        | 3,34 | 1,94 | FAIL |
| ZPR1     | O75312     | ZPR1 zinc finger                                      | 3,34 | 2,13 | FAIL |
| OTUD6B   | A0A087X0W9 | OTU deubiquitinase 6B                                 | 3,34 | 1,85 | FAIL |
| SIT1     | Q9Y3P8     | signaling threshold regulating transmembrane adaptor  | 3,34 | 2,81 | FAIL |

|          |            |                                                                 |      |      |      |
|----------|------------|-----------------------------------------------------------------|------|------|------|
| SLC38A2  | Q96QD8     | solute carrier family 38 member 2                               | 3,34 | 1,37 | FAIL |
| WDR5     | P61964     | WD repeat domain 5                                              | 3,33 | 2,33 | FAIL |
| MAP1S    | Q66K74     | microtubule associated protein 1S                               | 3,33 | 1,68 | FAIL |
| ELP3     | Q9H9T3     | elongator acetyltransferase complex subunit 3                   | 3,33 | 2,76 | FAIL |
| ADSL     | A0A1B0GTJ7 | adenylosuccinate lyase                                          | 3,33 | 4,53 | FAIL |
| GRAP2    | O75791     | GRB2 related adaptor protein 2                                  | 3,33 | 2,91 | FAIL |
| RFX1     | P22670     | regulatory factor X1                                            | 3,33 | 2,32 | FAIL |
| CISD2    | Q8N5K1     | CDGSH iron sulfur domain 2                                      | 3,32 | 1,48 | FAIL |
| HMGCS1   | Q01581     | 3-hydroxy-3-methylglutaryl-CoA synthase 1                       | 3,32 | 2,63 | FAIL |
| MCTS1    | Q9ULC4     | MCTS1 re-initiation and release factor                          | 3,32 | 1,99 | FAIL |
| PTPRCAP  | Q14761     | protein tyrosine phosphatase receptor type C associated protein | 3,31 | 1,78 | FAIL |
| ADD2     | P35612     | adducin 2                                                       | 3,31 | 1,35 | FAIL |
| TBK1     | A0A494C045 | TANK binding kinase 1                                           | 3,30 | 1,95 | FAIL |
| SDE2     | Q6IQ49     | SDE2 telomere maintenance homolog                               | 3,30 | 1,67 | FAIL |
| CTDP1    | Q9Y5B0     | CTD phosphatase subunit 1                                       | 3,30 | 2,34 | FAIL |
| HEATR6   | Q6AI08     | HEAT repeat containing 6                                        | 3,30 | 1,85 | FAIL |
| EMC1     | Q8N766     | ER membrane protein complex subunit 1                           | 3,29 | 1,44 | FAIL |
| ELP4     | A0A1W2PNY5 | elongator acetyltransferase complex subunit 4                   | 3,29 | 1,77 | FAIL |
| EXOSC3   | Q9NQT5     | exosome component 3                                             | 3,29 | 1,81 | FAIL |
| USP16    | Q9Y5T5     | ubiquitin specific peptidase 16                                 | 3,29 | 1,38 | FAIL |
| COG7     | P83436     | component of oligomeric golgi complex 7                         | 3,29 | 2,22 | FAIL |
| PPP1R12A | O14974     | protein phosphatase 1 regulatory subunit 12A                    | 3,28 | 2,80 | FAIL |
| AATF     | Q9NY61     | apoptosis antagonizing transcription factor                     | 3,28 | 1,79 | FAIL |
| PDE12    | F6T1Q0     | phosphodiesterase 12                                            | 3,28 | 2,51 | FAIL |
| EIF3L    | Q9Y262     | eukaryotic translation initiation factor 3 subunit L            | 3,28 | 1,52 | FAIL |
| TARBP2   | Q15633     | TARBP2 subunit of RISC loading complex                          | 3,28 | 2,34 | FAIL |
| EIF4E2   | O60573     | eukaryotic translation initiation factor 4E family member 2     | 3,28 | 1,94 | FAIL |
| MCAT     | Q8IVS2     | malonyl-CoA-acyl carrier protein transacylase                   | 3,28 | 2,03 | FAIL |
| GOLGA1   | Q92805     | golgin A1                                                       | 3,27 | 1,80 | FAIL |
| FDPS     | P14324     | farnesyl diphosphate synthase                                   | 3,26 | 3,63 | FAIL |
| GMDS     | O60547     | GDP-mannose 4,6-dehydratase                                     | 3,26 | 2,82 | FAIL |
| WDR41    | Q9HAD4     | WD repeat domain 41                                             | 3,26 | 1,64 | FAIL |
| MED15    | G3V1P5     | mediator complex subunit 15                                     | 3,25 | 2,64 | FAIL |
| PRRC1    | Q96M27     | proline rich coiled-coil 1                                      | 3,25 | 1,62 | FAIL |
| ALDOA    | P04075     | aldolase, fructose-bisphosphate A                               | 3,25 | 4,49 | FAIL |
| AARS1    | A0A6Q8PFY2 | alanyl-tRNA synthetase 1                                        | 3,24 | 2,39 | FAIL |
| ATRX     | P46100     | ATRX chromatin remodeler                                        | 3,24 | 2,22 | FAIL |
| FAM114A2 | Q9NRY5     | family with sequence similarity 114 member A2                   | 3,24 | 1,85 | FAIL |
| GRK3     | P35626     | G protein-coupled receptor kinase 3                             | 3,24 | 1,49 | FAIL |
| CCNYL1   | Q8N7R7     | cyclin Y like 1                                                 | 3,23 | 1,60 | FAIL |
| USP34    | Q70CQ2     | ubiquitin specific peptidase 34                                 | 3,23 | 2,74 | FAIL |
| HDAC6    | Q9UBN7     | histone deacetylase 6                                           | 3,23 | 1,49 | FAIL |
| TNFRSF8  | P28908     | TNF receptor superfamily member 8                               | 3,23 | 2,76 | FAIL |
| SCRIB    | A0A669KB89 | scribble planar cell polarity protein                           | 3,20 | 4,60 | FAIL |
| NCKIPSD  | Q9NZQ3     | NCK interacting protein with SH3 domain                         | 3,20 | 2,17 | FAIL |

|          |            |                                                                                                 |      |      |      |
|----------|------------|-------------------------------------------------------------------------------------------------|------|------|------|
| METTL17  | Q9H7H0     | methyltransferase like 17                                                                       | 3,20 | 2,03 | FAIL |
| C9orf72  | A0A2R8Y5K2 | C9orf72-SMCR8 complex subunit                                                                   | 3,20 | 1,94 | FAIL |
| STX5     | Q13190     | syntaxin 5                                                                                      | 3,19 | 3,07 | FAIL |
| TSNAX    | Q99598     | translin associated factor X                                                                    | 3,19 | 2,77 | FAIL |
| UPRT     | E9PSD7     | uracil phosphoribosyltransferase homolog                                                        | 3,19 | 3,97 | FAIL |
| CNNM3    | Q8NE01     | cyclin and CBS domain divalent metal cation transport mediator 3                                | 3,19 | 4,80 | FAIL |
| ACP1     | P24666     | acid phosphatase 1                                                                              | 3,18 | 2,29 | FAIL |
| KNSTRN   | Q9Y448     | kinetochore localized astrin (SPAG5) binding protein                                            | 3,18 | 2,20 | FAIL |
| SMARCC2  | Q8TAQ2     | SWI/SNF related, matrix associated, actin dependent regulator of chromatin subfamily c member 2 | 3,18 | 1,70 | FAIL |
| NUP54    | Q7Z3B4     | nucleoporin 54                                                                                  | 3,18 | 2,15 | FAIL |
| BOLA2    | Q9H3K6     | bolA family member 2                                                                            | 3,17 | 3,75 | FAIL |
| TBC1D1   | H0Y8P0     | TBC1 domain family member 1                                                                     | 3,17 | 5,17 | FAIL |
| EXOC1    | Q9NV70     | exocyst complex component 1                                                                     | 3,17 | 3,14 | FAIL |
| HERC5    | Q9UII4     | HECT and RLD domain containing E3 ubiquitin protein ligase 5                                    | 3,17 | 1,96 | FAIL |
| GDI2     | P50395     | GDP dissociation inhibitor 2                                                                    | 3,16 | 1,53 | FAIL |
| EXOC8    | Q8IYI6     | exocyst complex component 8                                                                     | 3,16 | 1,97 | FAIL |
| BORCS6   | Q96GS4     | BLOC-1 related complex subunit 6                                                                | 3,15 | 2,31 | FAIL |
| ATP6V1B2 | P21281     | ATPase H <sup>+</sup> transporting V1 subunit B2                                                | 3,15 | 1,84 | FAIL |
| RAD54L2  | Q9Y4B4     | RAD54 like 2                                                                                    | 3,15 | 3,54 | FAIL |
| CCDC88A  | A0A2R8Y7B1 | coiled-coil domain containing 88A                                                               | 3,15 | 2,03 | FAIL |
| TBCA     | O75347     | tubulin folding cofactor A                                                                      | 3,15 | 1,72 | FAIL |
| LAT      | O43561     | linker for activation of T cells                                                                | 3,15 | 3,85 | FAIL |
| DYNC1LI1 | Q9Y6G9     | dynein cytoplasmic 1 light intermediate chain 1                                                 | 3,14 | 4,07 | FAIL |
| PAFAH1B1 | P43034     | platelet activating factor acetylhydrolase 1b regulatory subunit 1                              | 3,14 | 2,76 | FAIL |
| FBXO22   | Q8NEZ5     | F-box protein 22                                                                                | 3,14 | 2,75 | FAIL |
| PAPSS1   | O43252     | 3'-phosphoadenosine 5'-phosphosulfate synthase 1                                                | 3,14 | 3,76 | FAIL |
| HMMR     | O75330     | hyaluronan mediated motility receptor                                                           | 3,14 | 2,81 | FAIL |
| PIK3C3   | A8MYT4     | phosphatidylinositol 3-kinase catalytic subunit type 3                                          | 3,13 | 1,46 | FAIL |
| SKA1     | Q96BD8     | spindle and kinetochore associated complex subunit 1                                            | 3,13 | 2,14 | FAIL |
| VTA1     | A0A087WY55 | vesicle trafficking 1                                                                           | 3,13 | 1,30 | FAIL |
|          | A0A3F2YNW7 |                                                                                                 | 3,13 | 3,10 | FAIL |
| WDR48    | Q8TAF3     | WD repeat domain 48                                                                             | 3,13 | 3,91 | FAIL |
| EPS15L1  | Q9UBC2     | epidermal growth factor receptor pathway substrate 15 like 1                                    | 3,12 | 1,61 | FAIL |
| ANXA6    | E5RK69     | annexin A6                                                                                      | 3,12 | 1,97 | FAIL |
| MAP2K1   | Q02750     | mitogen-activated protein kinase kinase 1                                                       | 3,12 | 2,16 | FAIL |
| PIP4K2A  | P48426     | phosphatidylinositol-5-phosphate 4-kinase type 2 alpha                                          | 3,12 | 1,88 | FAIL |
| DNAJC10  | Q8IXB1     | DnaJ heat shock protein family (Hsp40) member C10                                               | 3,12 | 2,07 | FAIL |
| NUP58    | Q9BVL2     | nucleoporin 58                                                                                  | 3,11 | 1,99 | FAIL |
| UBE2L3   | P68036     | ubiquitin conjugating enzyme E2 L3                                                              | 3,11 | 5,06 | FAIL |

|          |            |                                                                                       |      |      |      |
|----------|------------|---------------------------------------------------------------------------------------|------|------|------|
| LAMTOR1  | Q6IAA8     | late endosomal/lysosomal adaptor, MAPK and MTOR activator 1                           | 3,11 | 1,65 | FAIL |
| PFAS     | O15067     | phosphoribosylformylglycinamide synthase                                              | 3,11 | 2,91 | FAIL |
| MACF1    | H3BPE1     | microtubule actin crosslinking factor 1                                               | 3,11 | 2,59 | FAIL |
| ITPK1    | Q13572     | inositol-tetrakisphosphate 1-kinase                                                   | 3,10 | 3,37 | FAIL |
| CD81     | E9PRJ8     | CD81 molecule                                                                         | 3,10 | 1,68 | FAIL |
| PACS1    | Q6VY07     | phosphofurin acidic cluster sorting protein 1                                         | 3,10 | 2,24 | FAIL |
| MAPK3    | E9PQW4     | mitogen-activated protein kinase 3                                                    | 3,09 | 3,40 | FAIL |
| PISD     | Q9UG56     | phosphatidylserine decarboxylase                                                      | 3,09 | 1,88 | FAIL |
| STK38    | Q15208     | serine/threonine kinase 38                                                            | 3,09 | 2,73 | FAIL |
| C17orf49 | F8W038     | chromosome 17 open reading frame 49                                                   | 3,09 | 1,52 | FAIL |
| RAB7A    | P51149     | RAB7A, member RAS oncogene family                                                     | 3,09 | 2,89 | FAIL |
| ELP2     | Q6IA86     | elongator acetyltransferase complex subunit 2                                         | 3,09 | 3,81 | FAIL |
| NEK9     | Q8TD19     | NIMA related kinase 9                                                                 | 3,09 | 1,90 | FAIL |
| NME1     | P15531     | NME/NM23 nucleoside diphosphate kinase 1                                              | 3,09 | 2,63 | FAIL |
| GSTP1    | P09211     | glutathione S-transferase pi 1                                                        | 3,08 | 1,64 | FAIL |
| AGO2     | Q9UKV8     | argonaute RISC catalytic component 2                                                  | 3,08 | 2,26 | FAIL |
| RFX5     | F8W689     | regulatory factor X5                                                                  | 3,08 | 4,18 | FAIL |
| HSPA4    | P34932     | heat shock protein family A (Hsp70) member 4                                          | 3,08 | 2,89 | FAIL |
| MPZL1    | O95297     | myelin protein zero like 1                                                            | 3,08 | 1,81 | FAIL |
| PIK3C2A  | O00443     | phosphatidylinositol-4-phosphate 3-kinase catalytic subunit type 2 alpha              | 3,07 | 1,63 | FAIL |
| NACA     | H0YHX9     | nascent polypeptide associated complex subunit alpha                                  | 3,07 | 1,54 | FAIL |
| PYGM     | P11217     | glycogen phosphorylase, muscle associated                                             | 3,07 | 3,27 | FAIL |
| LDLR     | J3KMZ9     | low density lipoprotein receptor                                                      | 3,07 | 2,54 | FAIL |
| SNIP1    | Q8TAD8     | Smad nuclear interacting protein 1                                                    | 3,06 | 1,36 | FAIL |
| LARP1    | Q6PKG0     | La ribonucleoprotein 1, translational regulator                                       | 3,06 | 2,03 | FAIL |
| BAZ1A    | Q9NRL2     | bromodomain adjacent to zinc finger domain 1A                                         | 3,06 | 3,10 | FAIL |
| NRDC     | O43847     | nardilysin convertase                                                                 | 3,06 | 3,45 | FAIL |
| HMG20A   | Q9NP66     | high mobility group 20A                                                               | 3,06 | 1,68 | FAIL |
| RABEP2   | Q9H5N1     | rabaptin, RAB GTPase binding effector protein 2                                       | 3,06 | 3,03 | FAIL |
| SNUPN    | O95149     | snurportin 1                                                                          | 3,05 | 1,48 | FAIL |
| YRDC     | Q86U90     | yrdC N6-threonylcarbamoyltransferase domain containing                                | 3,05 | 4,93 | FAIL |
| PSME1    | Q06323     | proteasome activator subunit 1                                                        | 3,05 | 2,23 | FAIL |
| TBC1D2B  | Q9UPU7     | TBC1 domain family member 2B                                                          | 3,05 | 3,42 | FAIL |
| MAP4K1   | Q92918     | mitogen-activated protein kinase kinase kinase kinase 1                               | 3,04 | 2,56 | FAIL |
| ATP6AP2  | A0A1B0GTB0 | ATPase H <sup>+</sup> transporting accessory protein 2                                | 3,04 | 1,81 | FAIL |
| SLC39A6  | Q13433     | solute carrier family 39 member 6                                                     | 3,04 | 2,56 | FAIL |
| FECH     | K7ELX4     | ferrochelatase                                                                        | 3,04 | 1,82 | FAIL |
| TTC4     | O95801     | tetratricopeptide repeat domain 4                                                     | 3,04 | 2,21 | FAIL |
| DDOST    | P39656     | dolichyl-diphosphooligosaccharide--protein glycosyl-transferase non-catalytic subunit | 3,04 | 2,85 | FAIL |
| RPAP1    | Q9BWH6     | RNA polymerase II associated protein 1                                                | 3,03 | 1,70 | FAIL |
| PDAP1    | Q13442     | PDGFA associated protein 1                                                            | 3,03 | 3,50 | FAIL |
| SMAD5    | Q99717     | SMAD family member 5                                                                  | 3,03 | 2,23 | FAIL |

|          |        |                                                                                   |      |      |      |
|----------|--------|-----------------------------------------------------------------------------------|------|------|------|
| TMEM165  | Q9HC07 | transmembrane protein 165                                                         | 3,03 | 3,36 | FAIL |
| HAUS4    | Q9H6D7 | HAUS augmin like complex subunit 4                                                | 3,03 | 3,67 | FAIL |
| PARP9    | Q8IXQ6 | poly(ADP-ribose) polymerase family member 9                                       | 3,03 | 3,39 | FAIL |
| SH3GLB1  | Q9Y371 | SH3 domain containing GRB2 like, endophilin B1                                    | 3,03 | 2,42 | FAIL |
| EIF2B3   | Q9NR50 | eukaryotic translation initiation factor 2B subunit<br>gamma                      | 3,03 | 3,82 | FAIL |
| RALGAPB  | Q86X10 | Ral GTPase activating protein non-catalytic subunit<br>beta                       | 3,03 | 2,05 | FAIL |
| PAG1     | Q9NWQ8 | phosphoprotein membrane anchor with glycosphin-<br>golipid microdomains 1         | 3,02 | 2,05 | FAIL |
| FAM91A1  | Q658Y4 | family with sequence similarity 91 member A1                                      | 3,02 | 2,59 | FAIL |
| HDAC1    | Q13547 | histone deacetylase 1                                                             | 3,02 | 3,12 | FAIL |
| LRCH4    | O75427 | leucine rich repeats and calponin homology domain<br>containing 4                 | 3,02 | 2,54 | FAIL |
| DNPEP    | E5RIA4 | aspartyl aminopeptidase                                                           | 3,02 | 2,76 | FAIL |
| ARMC10   | Q8N2F6 | armadillo repeat containing 10                                                    | 3,02 | 2,17 | FAIL |
| ANLN     | Q9NQW6 | anillin, actin binding protein                                                    | 3,02 | 1,41 | FAIL |
| FNBP4    | Q8N3X1 | formin binding protein 4                                                          | 3,01 | 2,24 | FAIL |
| CNOT7    | Q9UIV1 | CCR4-NOT transcription complex subunit 7                                          | 3,01 | 1,56 | FAIL |
| PPFIBP1  | Q86W92 | PPFIA binding protein 1                                                           | 3,01 | 1,64 | FAIL |
| ERI1     | Q8IV48 | exoribonuclease 1                                                                 | 3,00 | 1,85 | FAIL |
| ZBTB1    | Q9Y2K1 | zinc finger and BTB domain containing 1                                           | 3,00 | 1,89 | FAIL |
| CAPZA1   | P52907 | capping actin protein of muscle Z-line subunit alpha 1                            | 3,00 | 2,78 | FAIL |
| UFM1     | P61960 | ubiquitin fold modifier 1                                                         | 3,00 | 4,43 | FAIL |
| GSPT1    | P15170 | G1 to S phase transition 1                                                        | 3,00 | 2,21 | FAIL |
| GSTCD    | D6R9W2 | glutathione S-transferase C-terminal domain containing                            | 3,00 | 1,62 | FAIL |
| RNASEL   | Q05823 | ribonuclease L                                                                    | 3,00 | 1,71 | FAIL |
| FAM117B  | Q6PIL5 | family with sequence similarity 117 member B                                      | 3,00 | 1,48 | FAIL |
| RTCA     | O00442 | RNA 3'-terminal phosphate cyclase                                                 | 2,99 | 3,59 | FAIL |
| STRIP1   | Q5VSL9 | striatin interacting protein 1                                                    | 2,99 | 3,00 | FAIL |
| DIAPH1   | O60610 | diaphanous related formin 1                                                       | 2,99 | 4,59 | FAIL |
| CCNB2    | O95067 | cyclin B2                                                                         | 2,99 | 1,99 | FAIL |
| YWHAQ    | P27348 | tyrosine 3-monooxygenase/tryptophan 5-monooxygen-<br>ase activation protein theta | 2,98 | 2,18 | FAIL |
| THEMIS   | Q8N1K5 | thymocyte selection associated                                                    | 2,98 | 1,58 | FAIL |
| CDK5RAP3 | Q96JB5 | CDK5 regulatory subunit associated protein 3                                      | 2,98 | 1,31 | FAIL |
| MYD88    | Q99836 | MYD88 innate immune signal transduction adaptor                                   | 2,98 | 1,44 | FAIL |
| RB1CC1   | Q8TDY2 | RB1 inducible coiled-coil 1                                                       | 2,98 | 3,83 | FAIL |
| CAPRIN1  | Q14444 | cell cycle associated protein 1                                                   | 2,97 | 2,44 | FAIL |
| TAF4     | O00268 | TATA-box binding protein associated factor 4                                      | 2,97 | 1,46 | FAIL |
| CAMK4    | Q16566 | calcium/calmodulin dependent protein kinase IV                                    | 2,96 | 2,09 | FAIL |
| MAPK14   | B4E0K5 | mitogen-activated protein kinase 14                                               | 2,96 | 2,04 | FAIL |
| EXOC6B   | Q9Y2D4 | exocyst complex component 6B                                                      | 2,96 | 1,40 | FAIL |
| VPS72    | Q15906 | vacuolar protein sorting 72 homolog                                               | 2,96 | 2,48 | FAIL |
| CDV3     | Q9UKY7 | CDV3 homolog                                                                      | 2,96 | 2,50 | FAIL |
| DOP1B    | Q9Y3R5 | DOP1 leucine zipper like protein B                                                | 2,96 | 1,70 | FAIL |

|         |            |                                                               |      |      |      |
|---------|------------|---------------------------------------------------------------|------|------|------|
| RRM2    | P31350     | ribonucleotide reductase regulatory subunit M2                | 2,95 | 4,52 | FAIL |
| KPNA4   | O00629     | karyopherin subunit alpha 4                                   | 2,95 | 2,05 | FAIL |
| GFPT1   | Q06210     | glutamine--fructose-6-phosphate transaminase 1                | 2,95 | 2,93 | FAIL |
| DHX40   | Q8IX18     | DEAH-box helicase 40                                          | 2,95 | 1,61 | FAIL |
| AP4M1   | O00189     | adaptor related protein complex 4 subunit mu 1                | 2,94 | 2,85 | FAIL |
| PALS2   | Q9NZW5     | protein associated with LIN7 2, MAGUK p55 family member       | 2,94 | 3,32 | FAIL |
| CAPG    | P40121     | capping actin protein, gelsolin like                          | 2,94 | 1,93 | FAIL |
| RUFY3   | Q7L099     | RUN and FYVE domain containing 3                              | 2,94 | 3,47 | FAIL |
| CFAP410 | O43822     | cilia and flagella associated protein 410                     | 2,94 | 1,59 | FAIL |
| TLK2    | Q86UE8     | tousled like kinase 2                                         | 2,93 | 3,43 | FAIL |
| WNK1    | F5GWT4     | WNK lysine deficient protein kinase 1                         | 2,93 | 1,98 | FAIL |
| NAP1L4  | Q99733     | nucleosome assembly protein 1 like 4                          | 2,93 | 3,45 | FAIL |
| DCTN4   | Q9UJW0     | dynactin subunit 4                                            | 2,92 | 4,23 | FAIL |
| CDC37   | Q16543     | cell division cycle 37, HSP90 cochaperone                     | 2,92 | 4,74 | FAIL |
| PHLDB3  | Q6NSJ2     | pleckstrin homology like domain family B member 3             | 2,92 | 1,86 | FAIL |
| RAB23   | Q9ULC3     | RAB23, member RAS oncogene family                             | 2,92 | 3,51 | FAIL |
|         | F5GYQ2     |                                                               | 2,92 | 1,62 | FAIL |
| NMRAL1  | Q9HBL8     | NmrA like redox sensor 1                                      | 2,92 | 2,32 | FAIL |
| AFAP1   | Q8N556     | actin filament associated protein 1                           | 2,91 | 1,71 | FAIL |
| SLC4A7  | E9PFN4     | solute carrier family 4 member 7                              | 2,91 | 2,30 | FAIL |
| PFN2    | P35080     | profilin 2                                                    | 2,90 | 2,15 | FAIL |
| SLC35E1 | H7C1I0     | solute carrier family 35 member E1                            | 2,90 | 1,64 | FAIL |
| LIMA1   | F8VQE1     | LIM domain and actin binding 1                                | 2,90 | 4,50 | FAIL |
| PCBP1   | Q15365     | poly(rC) binding protein 1                                    | 2,90 | 2,19 | FAIL |
| NDUFB7  | P17568     | NADH:ubiquinone oxidoreductase subunit B7                     | 2,90 | 2,94 | FAIL |
| HOMER1  | Q86YM7     | homer scaffold protein 1                                      | 2,90 | 3,12 | FAIL |
| COPS2   | P61201     | COP9 signalosome subunit 2                                    | 2,90 | 2,08 | FAIL |
| R3HDM1  | Q15032     | R3H domain containing 1                                       | 2,90 | 1,98 | FAIL |
| NIPBL   | A0A590UJS4 | NIPBL cohesin loading factor                                  | 2,89 | 3,78 | FAIL |
| CMA5    | Q8NFW8     | cytidine monophosphate N-acetylneuraminic acid synthetase     | 2,89 | 2,66 | FAIL |
| RAC1    | P63000     | Rac family small GTPase 1                                     | 2,89 | 2,14 | FAIL |
| USP4    | Q13107     | ubiquitin specific peptidase 4                                | 2,89 | 3,75 | FAIL |
| GNA13   | Q14344     | G protein subunit alpha 13                                    | 2,89 | 2,47 | FAIL |
| SEC23A  | F5H365     | SEC23 homolog A, COPII coat complex component                 | 2,88 | 1,50 | FAIL |
| SLC12A2 | P55011     | solute carrier family 12 member 2                             | 2,88 | 2,96 | FAIL |
| TMEM33  | D6RAA6     | transmembrane protein 33                                      | 2,88 | 1,90 | FAIL |
| HAT1    | O14929     | histone acetyltransferase 1                                   | 2,88 | 1,68 | FAIL |
| WDR7    | Q9Y4E6     | WD repeat domain 7                                            | 2,88 | 1,35 | FAIL |
| C7orf50 | Q9BRJ6     | chromosome 7 open reading frame 50                            | 2,88 | 1,72 | FAIL |
| TRIO    | O75962     | trio Rho guanine nucleotide exchange factor                   | 2,87 | 2,54 | FAIL |
| CD7     | J3QLM0     | CD7 molecule                                                  | 2,87 | 1,49 | FAIL |
| WDR75   | Q8IWA0     | WD repeat domain 75                                           | 2,87 | 1,43 | FAIL |
| PRKAR2B | P31323     | protein kinase cAMP-dependent type II regulatory subunit beta | 2,87 | 2,53 | FAIL |

|          |            |                                                        |      |      |      |
|----------|------------|--------------------------------------------------------|------|------|------|
| GIMAP6   | Q6P9H5     | GTPase, IMAP family member 6                           | 2,87 | 1,39 | FAIL |
| TMX3     | Q96JJ7     | thioredoxin related transmembrane protein 3            | 2,86 | 1,88 | FAIL |
| ZFC3H1   | O60293     | zinc finger C3H1-type containing                       | 2,86 | 1,67 | FAIL |
| GRK2     | P25098     | G protein-coupled receptor kinase 2                    | 2,86 | 3,72 | FAIL |
| DDB1     | Q16531     | damage specific DNA binding protein 1                  | 2,86 | 2,39 | FAIL |
| LDHA     | P00338     | lactate dehydrogenase A                                | 2,86 | 2,97 | FAIL |
| PML      | H3BT57     | PML nuclear body scaffold                              | 2,86 | 1,90 | FAIL |
| CYCS     | C9JFR7     | cytochrome c, somatic                                  | 2,86 | 3,34 | FAIL |
| CD82     | P27701     | CD82 molecule                                          | 2,86 | 1,77 | FAIL |
| RALA     | P11233     | RAS like proto-oncogene A                              | 2,86 | 1,79 | FAIL |
| CSNK1G1  | A0A0U1RQY7 | casein kinase 1 gamma 1                                | 2,85 | 1,85 | FAIL |
| ZNF281   | Q9Y2X9     | zinc finger protein 281                                | 2,85 | 2,19 | FAIL |
| MRPS6    | P82932     | mitochondrial ribosomal protein S6                     | 2,85 | 3,38 | FAIL |
| PTPRA    | P18433     | protein tyrosine phosphatase receptor type A           | 2,85 | 2,83 | FAIL |
| HAUS2    | Q9NVX0     | HAUS augmin like complex subunit 2                     | 2,85 | 2,88 | FAIL |
| EPHA3    | C9JXA2     | EPH receptor A3                                        | 2,85 | 2,45 | FAIL |
| USP19    | A0A0A0MR08 | ubiquitin specific peptidase 19                        | 2,85 | 4,47 | FAIL |
| VANGL1   | Q8TAA9     | VANGL planar cell polarity protein 1                   | 2,85 | 3,54 | FAIL |
| NUDT11   | Q96G61     | nudix hydrolase 11                                     | 2,84 | 1,89 | FAIL |
| TWF2     | Q6IBS0     | twinfilin actin binding protein 2                      | 2,84 | 1,72 | FAIL |
| RHOT1    | Q8IXI2     | ras homolog family member T1                           | 2,84 | 1,57 | FAIL |
| ACTR1A   | P61163     | actin related protein 1A                               | 2,84 | 4,55 | FAIL |
| UBR3     | Q6ZT12     | ubiquitin protein ligase E3 component n-recognin 3     | 2,84 | 2,19 | FAIL |
| MTA3     | E7EQY4     | metastasis associated 1 family member 3                | 2,84 | 2,34 | FAIL |
| KPNA3    | O00505     | karyopherin subunit alpha 3                            | 2,83 | 2,12 | FAIL |
| PLEKHA5  | Q9HAU0     | pleckstrin homology domain containing A5               | 2,83 | 2,13 | FAIL |
| HEATR3   | Q7Z4Q2     | HEAT repeat containing 3                               | 2,83 | 3,21 | FAIL |
| RAB5C    | P51148     | RAB5C, member RAS oncogene family                      | 2,83 | 2,90 | FAIL |
| PRDX6    | P30041     | peroxiredoxin 6                                        | 2,83 | 3,11 | FAIL |
| RCOR3    | Q9P2K3     | REST corepressor 3                                     | 2,83 | 1,63 | FAIL |
| NAPA     | P54920     | NSF attachment protein alpha                           | 2,83 | 1,47 | FAIL |
| LANCL1   | E9PHS0     | LanC like glutathione S-transferase 1                  | 2,82 | 2,95 | FAIL |
| PDZD11   | Q5EBL8     | PDZ domain containing 11                               | 2,82 | 1,54 | FAIL |
| HCCS     | P53701     | holocytochrome c synthase                              | 2,82 | 5,20 | FAIL |
| LIG3     | P49916     | DNA ligase 3                                           | 2,82 | 4,25 | FAIL |
| EXOSC6   | Q5RKV6     | exosome component 6                                    | 2,82 | 1,50 | FAIL |
| TRAT1    | Q6PIZ9     | T cell receptor associated transmembrane adaptor 1     | 2,82 | 2,49 | FAIL |
| VEZT     | Q9HBM0     | vezatin, adherens junctions transmembrane protein      | 2,82 | 1,77 | FAIL |
| ARHGAP35 | Q9NRY4     | Rho GTPase activating protein 35                       | 2,82 | 4,45 | FAIL |
| LIMD1    | C9JRJ5     | LIM domain containing 1                                | 2,82 | 2,53 | FAIL |
| AGPAT1   | Q99943     | 1-acylglycerol-3-phosphate O-acyltransferase 1         | 2,82 | 1,95 | FAIL |
| DMXL2    | H0YLM8     | Dmx like 2                                             | 2,81 | 3,58 | FAIL |
| ZNF318   | Q5VUA4     | zinc finger protein 318                                | 2,81 | 1,67 | FAIL |
| CHMP5    | Q9NZZ3     | charged multivesicular body protein 5                  | 2,81 | 2,91 | FAIL |
| MAGED2   | Q9UNF1     | MAGE family member D2                                  | 2,81 | 1,56 | FAIL |
| PSME2    | A0A087X1Z3 | proteasome activator subunit 2                         | 2,81 | 2,11 | FAIL |
| RAB3GAP2 | Q9H2M9     | RAB3 GTPase activating non-catalytic protein subunit 2 | 2,80 | 3,06 | FAIL |

|          |            |                                                               |      |      |      |
|----------|------------|---------------------------------------------------------------|------|------|------|
| NOMO2    | Q5JPE7     | NODAL modulator 2                                             | 2,80 | 2,96 | FAIL |
| MKI67    | P46013     | marker of proliferation Ki-67                                 | 2,80 | 2,96 | FAIL |
| DYRK1A   | A0A2R8Y6I6 | dual specificity tyrosine phosphorylation regulated kinase 1A | 2,80 | 3,97 | FAIL |
| RUFY1    | Q96T51     | RUN and FYVE domain containing 1                              | 2,80 | 3,11 | FAIL |
| CNIH4    | Q9P003     | cornichon family AMPA receptor auxiliary protein 4            | 2,79 | 1,59 | FAIL |
| SLC5A6   | Q9Y289     | solute carrier family 5 member 6                              | 2,79 | 1,66 | FAIL |
| PEX14    | O75381     | peroxisomal biogenesis factor 14                              | 2,79 | 2,05 | FAIL |
| H2AC6    | Q93077     | H2A clustered histone 6                                       | 2,79 | 1,53 | FAIL |
| GMP5     | P49915     | guanine monophosphate synthase                                | 2,79 | 2,72 | FAIL |
| TFB1M    | Q8WVM0     | transcription factor B1, mitochondrial                        | 2,78 | 1,42 | FAIL |
| SEPTIN7  | Q16181     | septin 7                                                      | 2,78 | 3,28 | FAIL |
| MPRIIP   | A0A494BZV2 | myosin phosphatase Rho interacting protein                    | 2,78 | 2,22 | FAIL |
| MRPL15   | E5RIZ4     | mitochondrial ribosomal protein L15                           | 2,78 | 2,01 | FAIL |
| APAF1    | C9JLV4     | apoptotic peptidase activating factor 1                       | 2,78 | 4,15 | FAIL |
| ROCK1    | Q13464     | Rho associated coiled-coil containing protein kinase 1        | 2,78 | 2,06 | FAIL |
| CLNS1A   | P54105     | chloride nucleotide-sensitive channel 1A                      | 2,77 | 1,63 | FAIL |
| NUF2     | Q9BZD4     | NUF2 component of NDC80 kinetochore complex                   | 2,77 | 1,61 | FAIL |
| TUBA4A   | P68366     | tubulin alpha 4a                                              | 2,77 | 3,26 | FAIL |
| CDK17    | Q00537     | cyclin dependent kinase 17                                    | 2,77 | 1,43 | FAIL |
| ZNF598   | Q86UK7     | zinc finger protein 598, E3 ubiquitin ligase                  | 2,77 | 2,84 | FAIL |
| TOPBP1   | Q92547     | DNA topoisomerase II binding protein 1                        | 2,77 | 2,02 | FAIL |
| DHX30    | H7BXY3     | DEH-box helicase 30                                           | 2,77 | 2,47 | FAIL |
| PPP6C    | O00743     | protein phosphatase 6 catalytic subunit                       | 2,77 | 2,49 | FAIL |
| MRPL44   | Q9H9J2     | mitochondrial ribosomal protein L44                           | 2,77 | 1,37 | FAIL |
| COPS3    | H7C3P9     | COP9 signalosome subunit 3                                    | 2,77 | 3,69 | FAIL |
| RNF138   | Q8WVD3     | ring finger protein 138                                       | 2,76 | 1,60 | FAIL |
| FLVCR1   | Q9Y5Y0     | FLVCR choline and heme transporter 1                          | 2,76 | 2,00 | FAIL |
| BRIP1    | Q9BX63     | BRCA1 interacting helicase 1                                  | 2,76 | 1,42 | FAIL |
| PLCG2    | P16885     | phospholipase C gamma 2                                       | 2,76 | 2,11 | FAIL |
| FARP2    | O94887     | FERM, ARH/RhoGEF and pleckstrin domain protein 2              | 2,76 | 2,34 | FAIL |
| STK4     | Q13043     | serine/threonine kinase 4                                     | 2,76 | 4,34 | FAIL |
| NDUFA13  | Q9P0J0     | NADH:ubiquinone oxidoreductase subunit A13                    | 2,76 | 2,54 | FAIL |
| TARS3    | A2RTX5     | threonyl-tRNA synthetase 3                                    | 2,76 | 1,44 | FAIL |
| CBL      | P22681     | Cbl proto-oncogene                                            | 2,76 | 2,02 | FAIL |
| DTL      | Q9NZJ0     | denticless E3 ubiquitin protein ligase homolog                | 2,76 | 3,19 | FAIL |
| ZEB1     | P37275     | zinc finger E-box binding homeobox 1                          | 2,76 | 1,96 | FAIL |
| CASP8AP2 | Q9UKL3     | caspase 8 associated protein 2                                | 2,76 | 1,34 | FAIL |
| PPP4R3B  | Q5MIZ7     | protein phosphatase 4 regulatory subunit 3B                   | 2,76 | 1,52 | FAIL |
| HOOK3    | Q86VS8     | hook microtubule tethering protein 3                          | 2,75 | 1,45 | FAIL |
| MED4     | Q9NPJ6     | mediator complex subunit 4                                    | 2,75 | 1,87 | FAIL |
| NBEAL2   | A0A494C1V1 | neurobeachin like 2                                           | 2,75 | 3,33 | FAIL |
| CSK      | P41240     | C-terminal Src kinase                                         | 2,75 | 3,08 | FAIL |
| PATL1    | Q86TB9     | PAT1 homolog 1, processing body mRNA decay factor             | 2,75 | 2,78 | FAIL |
| DAXX     | Q9UER7     | death domain associated protein                               | 2,75 | 2,12 | FAIL |
| CARM1    | Q86X55     | coactivator associated arginine methyltransferase 1           | 2,75 | 2,62 | FAIL |
| SMG7     | E9PD50     | SMG7 nonsense mediated mRNA decay factor                      | 2,75 | 2,58 | FAIL |



|            |            |                                                                    |      |      |      |
|------------|------------|--------------------------------------------------------------------|------|------|------|
| RUSF1      | H3BR29     | RUS family member 1                                                | 2,75 | 1,69 | FAIL |
| SPAG9      | O60271     | sperm associated antigen 9                                         | 2,75 | 3,42 | FAIL |
| CYTH1      | Q15438     | cytohesin 1                                                        | 2,75 | 2,50 | FAIL |
| UHRF2      | Q96PU4     | ubiquitin like with PHD and ring finger domains 2                  | 2,74 | 3,25 | FAIL |
| NCOA3      | Q9Y6Q9     | nuclear receptor coactivator 3                                     | 2,74 | 3,78 | FAIL |
|            | A6NML8     |                                                                    | 2,74 | 1,83 | FAIL |
| NAA16      | Q6N069     | N-alpha-acetyltransferase 16, NatA auxiliary subunit               | 2,74 | 1,90 | FAIL |
| DYNC1LI2   | O43237     | dynein cytoplasmic 1 light intermediate chain 2                    | 2,74 | 1,37 | FAIL |
| MSN        | P26038     | moesin                                                             | 2,74 | 2,57 | FAIL |
| CCNY       | Q8ND76     | cyclin Y                                                           | 2,73 | 3,59 | FAIL |
| PRDX1      | Q06830     | peroxiredoxin 1                                                    | 2,73 | 2,10 | FAIL |
| IRF3       | Q14653     | interferon regulatory factor 3                                     | 2,73 | 1,70 | FAIL |
| CAMLG      | P49069     | calcium modulating ligand                                          | 2,73 | 3,78 | FAIL |
| SPPL2C     | Q8IUH8     | signal peptide peptidase like 2C                                   | 2,73 | 1,49 | FAIL |
| MTF2       | Q9Y483     | metal response element binding transcription factor 2              | 2,73 | 2,31 | FAIL |
| PPP1R12A   | F8VZN8     | protein phosphatase 1 regulatory subunit 12A                       | 2,73 | 1,60 | FAIL |
| GET4       | Q7L5D6     | guided entry of tail-anchored proteins factor 4                    | 2,73 | 1,48 | FAIL |
| NDUFB6     | A0A087WZX2 | NADH:ubiquinone oxidoreductase subunit B6                          | 2,73 | 1,34 | FAIL |
| ANAPC1     | Q9H1A4     | anaphase promoting complex subunit 1                               | 2,73 | 1,69 | FAIL |
| RAE1       | P78406     | ribonucleic acid export 1                                          | 2,73 | 1,68 | FAIL |
| TIPRL      | O75663     | TOR signaling pathway regulator                                    | 2,73 | 3,21 | FAIL |
| POLA1      | A6NMQ1     | DNA polymerase alpha 1, catalytic subunit                          | 2,73 | 1,72 | FAIL |
| PIH1D1     | Q9NWS0     | PIH1 domain containing 1                                           | 2,73 | 2,81 | FAIL |
|            | Q9ULM6     |                                                                    | 2,72 | 2,73 | FAIL |
| ARHGEF7    | A0A2R8YG42 | Rho guanine nucleotide exchange factor 7                           | 2,72 | 4,65 | FAIL |
| KIF15      | Q9NS87     | kinesin family member 15                                           | 2,72 | 1,68 | FAIL |
| WDR1       | O75083     | WD repeat domain 1                                                 | 2,72 | 3,82 | FAIL |
| NR2C2      | P49116     | nuclear receptor subfamily 2 group C member 2                      | 2,72 | 2,15 | FAIL |
| TRAPPC2L   | A0A0B4J286 | trafficking protein particle complex subunit 2L                    | 2,72 | 1,59 | FAIL |
| PLEKHA1    | Q5RGS4     | pleckstrin homology domain containing A1                           | 2,72 | 2,23 | FAIL |
| LSM3       | P62310     | LSM3 homolog, U6 small nuclear RNA and mRNA degradation associated | 2,71 | 1,64 | FAIL |
| JAM3       | Q9BX67     | junctional adhesion molecule 3                                     | 2,71 | 2,65 | FAIL |
| RAB3GAP1   | Q15042     | RAB3 GTPase activating protein catalytic subunit 1                 | 2,71 | 1,56 | FAIL |
| TSR1       | Q2NL82     | TSR1 ribosome maturation factor                                    | 2,71 | 1,59 | FAIL |
| GADD45GIP1 | Q8TAE8     | GADD45G interacting protein 1                                      | 2,71 | 1,76 | FAIL |
| CTNNB1     | A0A2R8YCH5 | catenin beta 1                                                     | 2,71 | 2,20 | FAIL |
| REEP5      | Q00765     | receptor accessory protein 5                                       | 2,71 | 2,54 | FAIL |
| AMMECR1L   | Q6DCA0     | AMMECR1 like                                                       | 2,71 | 2,89 | FAIL |
| TPP2       | A0A494C0U1 | tripeptidyl peptidase 2                                            | 2,71 | 2,18 | FAIL |
| CNOT11     | Q9UKZ1     | CCR4-NOT transcription complex subunit 11                          | 2,71 | 1,70 | FAIL |
| ACAP2      | Q15057     | ArfGAP with coiled-coil, ankyrin repeat and PH domains 2           | 2,71 | 2,80 | FAIL |
| RAB18      | Q9NP72     | RAB18, member RAS oncogene family                                  | 2,71 | 2,20 | FAIL |
| VCP        | P55072     | valosin containing protein                                         | 2,71 | 1,98 | FAIL |
| NT5C3A     | X6RM59     | 5'-nucleotidase, cytosolic IIIA                                    | 2,71 | 4,27 | FAIL |
| GCLM       | P48507     | glutamate-cysteine ligase modifier subunit                         | 2,71 | 2,83 | FAIL |

|         |            |                                                                                                      |      |      |      |
|---------|------------|------------------------------------------------------------------------------------------------------|------|------|------|
| RFXAP   | O00287     | regulatory factor X associated protein                                                               | 2,70 | 2,61 | FAIL |
| PPP2R5D | E9PFR3     | protein phosphatase 2 regulatory subunit B'delta                                                     | 2,70 | 2,69 | FAIL |
| ITGB2   | P05107     | integrin subunit beta 2                                                                              | 2,70 | 1,52 | FAIL |
| COG1    | Q8WTW3     | component of oligomeric golgi complex 1                                                              | 2,70 | 2,96 | FAIL |
| GIT2    | Q14161     | GIT ArfGAP 2                                                                                         | 2,70 | 2,38 | FAIL |
| ELP1    | O95163     | elongator acetyltransferase complex subunit 1                                                        | 2,70 | 3,37 | FAIL |
|         | A0A1W2PNZ9 |                                                                                                      | 2,70 | 5,48 | FAIL |
| SUDS3   | Q9H7L9     | SDS3 homolog, SIN3A corepressor complex component                                                    | 2,70 | 2,11 | FAIL |
| AGAP2   | F8VVT9     | ArfGAP with GTPase domain, ankyrin repeat and PH domain 2                                            | 2,70 | 4,53 | FAIL |
| MAT2B   | Q9NZL9     | methionine adenosyltransferase 2 non-catalytic beta subunit                                          | 2,69 | 1,97 | FAIL |
| ETS1    | P14921     | ETS proto-oncogene 1, transcription factor                                                           | 2,69 | 6,10 | FAIL |
| LYPLAL1 | Q5VWZ2     | lysophospholipase like 1                                                                             | 2,69 | 2,16 | FAIL |
| NAF1    | Q96HR8     | nuclear assembly factor 1 ribonucleoprotein                                                          | 2,69 | 1,94 | FAIL |
| BUB1B   | O60566     | BUB1 mitotic checkpoint serine/threonine kinase B                                                    | 2,69 | 1,82 | FAIL |
| SQLE    | Q14534     | squalene epoxidase                                                                                   | 2,69 | 1,33 | FAIL |
| AGPAT2  | O15120     | 1-acylglycerol-3-phosphate O-acyltransferase 2                                                       | 2,69 | 1,73 | FAIL |
| TAPT1   | Q6NXT6     | transmembrane anterior posterior transformation 1                                                    | 2,68 | 3,18 | FAIL |
| UBE2I   | H3BPC4     | ubiquitin conjugating enzyme E2 I                                                                    | 2,68 | 1,49 | FAIL |
| THEM6   | Q8WUY1     | thioesterase superfamily member 6                                                                    | 2,68 | 4,30 | FAIL |
| ITPR2   | Q14571     | inositol 1,4,5-trisphosphate receptor type 2                                                         | 2,68 | 3,73 | FAIL |
| TPD52L2 | O43399     | TPD52 like 2                                                                                         | 2,67 | 1,98 | FAIL |
| IRAG2   | F8W9L6     | inositol 1,4,5-trisphosphate receptor associated 2                                                   | 2,67 | 2,23 | FAIL |
| KANSL3  | Q9P2N6     | KAT8 regulatory NSL complex subunit 3                                                                | 2,67 | 1,74 | FAIL |
| RNF40   | O75150     | ring finger protein 40                                                                               | 2,67 | 5,61 | FAIL |
| DEPDC1B | Q8WUY9     | DEP domain containing 1B                                                                             | 2,67 | 4,67 | FAIL |
| CD2AP   | Q9Y5K6     | CD2 associated protein                                                                               | 2,67 | 1,88 | FAIL |
| PSMD2   | Q13200     | proteasome 26S subunit ubiquitin receptor, non-ATPase 2                                              | 2,67 | 2,37 | FAIL |
| KARS1   | Q15046     | lysyl-tRNA synthetase 1                                                                              | 2,67 | 3,34 | FAIL |
| CMPK1   | P30085     | cytidine/uridine monophosphate kinase 1                                                              | 2,67 | 2,30 | FAIL |
| ANKHD1  | D6RHC4     | ankyrin repeat and KH domain containing 1                                                            | 2,67 | 1,77 | FAIL |
| ARL6IP6 | Q8N6S5     | ADP ribosylation factor like GTPase 6 interacting protein 6                                          | 2,67 | 1,64 | FAIL |
| NCAPG2  | Q86XI2     | non-SMC condensin II complex subunit G2                                                              | 2,66 | 1,89 | FAIL |
| EIF1    | P41567     | eukaryotic translation initiation factor 1                                                           | 2,66 | 1,52 | FAIL |
| SHCBP1  | Q8NEM2     | SHC binding and spindle associated 1                                                                 | 2,66 | 1,41 | FAIL |
| GIMAP4  | Q9NUV9     | GTPase, IMAP family member 4                                                                         | 2,66 | 1,61 | FAIL |
| EXOSC7  | Q15024     | exosome component 7                                                                                  | 2,66 | 2,07 | FAIL |
| AHDC1   | Q5TGY3     | AT-hook DNA binding motif containing 1                                                               | 2,66 | 1,58 | FAIL |
| DBN1    | Q16643     | drebrin 1                                                                                            | 2,66 | 4,29 | FAIL |
| PRRC2B  | Q5JSZ5     | proline rich coiled-coil 2B                                                                          | 2,66 | 1,76 | FAIL |
| SLC4A2  | P04920     | solute carrier family 4 member 2                                                                     | 2,66 | 2,08 | FAIL |
| GIT1    | A0A0C4DGN6 | GIT ArfGAP 1                                                                                         | 2,66 | 4,42 | FAIL |
| MTHFD2  | P13995     | methylenetetrahydrofolate dehydrogenase (NADP+ dependent) 2, methenyltetrahydrofolate cyclohydrolase | 2,66 | 1,39 | FAIL |

|         |            |                                                               |      |      |      |
|---------|------------|---------------------------------------------------------------|------|------|------|
| EIF3G   | O75821     | eukaryotic translation initiation factor 3 subunit G          | 2,65 | 3,88 | FAIL |
| NGLY1   | A0A0C4DFP4 | N-glycanase 1                                                 | 2,65 | 1,56 | FAIL |
| MEN1    | A0A5F9ZHS3 | menin 1                                                       | 2,65 | 3,98 | FAIL |
| LARP1B  | A0A3B3ISF0 | La ribonucleoprotein 1B                                       | 2,65 | 1,87 | FAIL |
| ARRB2   | P32121     | arrestin beta 2                                               | 2,65 | 2,56 | FAIL |
| STK38L  | Q9Y2H1     | serine/threonine kinase 38 like                               | 2,65 | 2,91 | FAIL |
| GNAQ    | P50148     | G protein subunit alpha q                                     | 2,65 | 4,23 | FAIL |
| MTMR1   | F8WA39     | myotubularin related protein 1                                | 2,64 | 1,89 | FAIL |
| PPM1A   | P35813     | protein phosphatase, Mg2+/Mn2+ dependent 1A                   | 2,64 | 1,80 | FAIL |
| LTA4H   | P09960     | leukotriene A4 hydrolase                                      | 2,64 | 2,65 | FAIL |
| PRRC2C  | Q9Y520     | proline rich coiled-coil 2C                                   | 2,64 | 4,87 | FAIL |
| LRRFIP1 | Q32MZ4     | LRR binding FLII interacting protein 1                        | 2,64 | 2,52 | FAIL |
| TCP1    | P17987     | t-complex 1                                                   | 2,64 | 3,00 | FAIL |
| UBXN1   | Q04323     | UBX domain protein 1                                          | 2,64 | 2,47 | FAIL |
| ESYT1   | Q9BSJ8     | extended synaptotagmin 1                                      | 2,63 | 3,22 | FAIL |
| CNOT9   | Q92600     | CCR4-NOT transcription complex subunit 9                      | 2,63 | 2,64 | FAIL |
| ATP6V1A | P38606     | ATPase H+ transporting V1 subunit A                           | 2,63 | 2,87 | FAIL |
| EIF3J   | O75822     | eukaryotic translation initiation factor 3 subunit J          | 2,63 | 3,48 | FAIL |
| DICER1  | Q9UPY3     | dicer 1, ribonuclease III                                     | 2,63 | 2,07 | FAIL |
| NR3C1   | P04150     | nuclear receptor subfamily 3 group C member 1                 | 2,63 | 2,14 | FAIL |
| SLFN5   | Q08AF3     | schlafen family member 5                                      | 2,63 | 1,47 | FAIL |
| PPP3CB  | P16298     | protein phosphatase 3 catalytic subunit beta                  | 2,63 | 6,03 | FAIL |
| CHMP4B  | Q9H444     | charged multivesicular body protein 4B                        | 2,62 | 1,76 | FAIL |
| ATP2A3  | Q93084     | ATPase sarcoplasmic/endoplasmic reticulum Ca2+ transporting 3 | 2,62 | 2,29 | FAIL |
| USP47   | Q96K76     | ubiquitin specific peptidase 47                               | 2,62 | 2,19 | FAIL |
| SHOC2   | Q9UQ13     | SHOC2 leucine rich repeat scaffold protein                    | 2,62 | 1,74 | FAIL |
| UBASH3B | Q8TF42     | ubiquitin associated and SH3 domain containing B              | 2,61 | 1,50 | FAIL |
| SKP1    | P63208     | S-phase kinase associated protein 1                           | 2,61 | 1,50 | FAIL |
| KANSL1  | Q7Z3B3     | KAT8 regulatory NSL complex subunit 1                         | 2,61 | 1,51 | FAIL |
| BEND3   | Q5T5X7     | BEN domain containing 3                                       | 2,61 | 1,50 | FAIL |
| PPP6R1  | Q9UPN7     | protein phosphatase 6 regulatory subunit 1                    | 2,61 | 2,33 | FAIL |
| TBL2    | Q9Y4P3     | transducin beta like 2                                        | 2,61 | 2,30 | FAIL |
| VPS11   | Q9H270     | VPS11 core subunit of CORVET and HOPS complexes               | 2,61 | 2,46 | FAIL |
| SEC63   | Q9UGP8     | SEC63 homolog, protein translocation regulator                | 2,60 | 2,98 | FAIL |
| CHD7    | Q9P2D1     | chromodomain helicase DNA binding protein 7                   | 2,60 | 2,92 | FAIL |
| ARL6IP5 | O75915     | ADP ribosylation factor like GTPase 6 interacting protein 5   | 2,60 | 1,67 | FAIL |
| STAM2   | O75886     | signal transducing adaptor molecule 2                         | 2,60 | 3,55 | FAIL |
| PPP1CA  | P62136     | protein phosphatase 1 catalytic subunit alpha                 | 2,60 | 3,09 | FAIL |
| RNH1    | P13489     | ribonuclease/angiogenin inhibitor 1                           | 2,60 | 2,74 | FAIL |
| RBM19   | Q9Y4C8     | RNA binding motif protein 19                                  | 2,60 | 1,69 | FAIL |
| STX4    | Q12846     | syntaxin 4                                                    | 2,60 | 1,58 | FAIL |
| DCAF5   | Q96JK2     | DDB1 and CUL4 associated factor 5                             | 2,60 | 1,47 | FAIL |
| GSTO1   | P78417     | glutathione S-transferase omega 1                             | 2,60 | 2,74 | FAIL |
| DEGS1   | O15121     | delta 4-desaturase, sphingolipid 1                            | 2,59 | 2,62 | FAIL |

|         |            |                                                                      |      |      |      |
|---------|------------|----------------------------------------------------------------------|------|------|------|
| BMP2K   | Q9NSY1     | BMP2 inducible kinase                                                | 2,59 | 3,72 | FAIL |
| PYGB    | P11216     | glycogen phosphorylase B                                             | 2,59 | 2,31 | FAIL |
| RAI1    | Q7Z5J4     | retinoic acid induced 1                                              | 2,59 | 2,74 | FAIL |
| UPF3B   | Q9BZI7     | UPF3B regulator of nonsense mediated mRNA decay                      | 2,59 | 1,93 | FAIL |
| ETV6    | P41212     | ETS variant transcription factor 6                                   | 2,59 | 2,14 | FAIL |
| NME7    | Q9Y5B8     | NME/NM23 family member 7                                             | 2,59 | 2,43 | FAIL |
| MOB1B   | Q7L9L4     | MOB kinase activator 1B                                              | 2,59 | 1,87 | FAIL |
| GPN1    | Q9HCN4     | GPN-loop GTPase 1                                                    | 2,59 | 1,45 | FAIL |
| SRC     | P12931     | SRC proto-oncogene, non-receptor tyrosine kinase                     | 2,59 | 2,39 | FAIL |
| WDR18   | Q9BV38     | WD repeat domain 18                                                  | 2,59 | 2,81 | FAIL |
| TNRC6B  | Q9UPQ9     | trinucleotide repeat containing adaptor 6B                           | 2,58 | 2,43 | FAIL |
| ZNF106  | Q9H2Y7     | zinc finger protein 106                                              | 2,58 | 4,37 | FAIL |
| UBE4B   | O95155     | ubiquitination factor E4B                                            | 2,58 | 5,05 | FAIL |
| PHC3    | Q8NDX5     | polyhomeotic homolog 3                                               | 2,58 | 3,56 | FAIL |
| UBFD1   | O14562     | ubiquitin family domain containing 1                                 | 2,58 | 3,63 | FAIL |
| SPTLC2  | O15270     | serine palmitoyltransferase long chain base subunit 2                | 2,58 | 1,93 | FAIL |
| KHSRP   | Q92945     | KH-type splicing regulatory protein                                  | 2,58 | 2,50 | FAIL |
| ACBD6   | Q9BR61     | acyl-CoA binding domain containing 6                                 | 2,58 | 1,78 | FAIL |
| PRKAR2A | P13861     | protein kinase cAMP-dependent type II regulatory subunit alpha       | 2,57 | 3,83 | FAIL |
| ORC3    | Q9UBD5     | origin recognition complex subunit 3                                 | 2,57 | 3,39 | FAIL |
| XPO4    | Q9C0E2     | exportin 4                                                           | 2,57 | 1,35 | FAIL |
| CYFIP1  | Q7L576     | cytoplasmic FMR1 interacting protein 1                               | 2,57 | 2,24 | FAIL |
| SLC19A1 | P41440     | solute carrier family 19 member 1                                    | 2,57 | 2,19 | FAIL |
| PSMD5   | Q16401     | proteasome 26S subunit, non-ATPase 5                                 | 2,57 | 1,70 | FAIL |
| ILK     | A0A0A0MTH3 | integrin linked kinase                                               | 2,57 | 1,74 | FAIL |
| BTN3A2  | S4R3N0     | butyrophilin subfamily 3 member A2                                   | 2,56 | 1,39 | FAIL |
| PSMC1   | P62191     | proteasome 26S subunit, ATPase 1                                     | 2,56 | 2,89 | FAIL |
| EXOC7   | A0A0A0MSB8 | exocyst complex component 7                                          | 2,56 | 3,08 | FAIL |
| SCD5    | Q86SK9     | stearoyl-CoA desaturase 5                                            | 2,56 | 1,74 | FAIL |
| PPM1L   | Q5SGD2     | protein phosphatase, Mg <sup>2+</sup> /Mn <sup>2+</sup> dependent 1L | 2,56 | 1,96 | FAIL |
| GIPC1   | O14908     | GIPC PDZ domain containing family member 1                           | 2,56 | 3,02 | FAIL |
| HTATSF1 | O43719     | HIV-1 Tat specific factor 1                                          | 2,56 | 3,95 | FAIL |
| PITPNB  | P48739     | phosphatidylinositol transfer protein beta                           | 2,56 | 2,04 | FAIL |
| UBE2O   | Q9C0C9     | ubiquitin conjugating enzyme E2 O                                    | 2,55 | 2,37 | FAIL |
| SLC1A4  | P43007     | solute carrier family 1 member 4                                     | 2,55 | 2,63 | FAIL |
| FPGS    | Q05932     | folylpolyglutamate synthase                                          | 2,55 | 1,58 | FAIL |
| CCDC61  | Q9Y6R9     | coiled-coil domain containing 61                                     | 2,55 | 5,22 | FAIL |
| SCD     | O00767     | stearoyl-CoA desaturase                                              | 2,55 | 1,72 | FAIL |
| NUDT1   | P36639     | nudix hydrolase 1                                                    | 2,55 | 2,16 | FAIL |
| TYMS    | P04818     | thymidylate synthetase                                               | 2,55 | 1,69 | FAIL |
| ELL     | P55199     | elongation factor for RNA polymerase II                              | 2,55 | 1,35 | FAIL |
| AFF4    | Q9UHB7     | ALF transcription elongation factor 4                                | 2,54 | 2,02 | FAIL |
| ZNF217  | O75362     | zinc finger protein 217                                              | 2,54 | 2,31 | FAIL |
| PRKCI   | P41743     | protein kinase C iota                                                | 2,54 | 1,42 | FAIL |
| ATP6V1F | Q16864     | ATPase H <sup>+</sup> transporting V1 subunit F                      | 2,54 | 4,69 | FAIL |

|           |            |                                                               |      |      |      |
|-----------|------------|---------------------------------------------------------------|------|------|------|
| EIF4EBP2  | Q13542     | eukaryotic translation initiation factor 4E binding protein 2 | 2,54 | 1,64 | FAIL |
| ZNF592    | H0YM74     | zinc finger protein 592                                       | 2,54 | 1,81 | FAIL |
| SGO2      | Q562F6     | shugoshin 2                                                   | 2,54 | 1,40 | FAIL |
| SORT1     | Q99523     | sortilin 1                                                    | 2,54 | 2,45 | FAIL |
| STK33     | Q9BYT3     | serine/threonine kinase 33                                    | 2,54 | 1,53 | FAIL |
| ELMOD2    | Q8IZ81     | ELMO domain containing 2                                      | 2,54 | 4,73 | FAIL |
| RIMOC1    | A6NDU8     | RAB7A interacting MON1-CCZ1 complex subunit 1                 | 2,53 | 3,00 | FAIL |
| PHF8      | H0Y3N9     | PHD finger protein 8                                          | 2,53 | 4,80 | FAIL |
| AURKB     | Q96GD4     | aurora kinase B                                               | 2,53 | 2,72 | FAIL |
| IQGAP1    | P46940     | IQ motif containing GTPase activating protein 1               | 2,53 | 2,37 | FAIL |
| ITGB1     | P05556     | integrin subunit beta 1                                       | 2,53 | 3,60 | FAIL |
| NOTCH1    | P46531     | notch receptor 1                                              | 2,53 | 1,56 | FAIL |
| PYCR3     | Q53H96     | pyrroline-5-carboxylate reductase 3                           | 2,52 | 1,33 | FAIL |
| STING1    | Q86WV6     | stimulator of interferon response cGAMP interactor 1          | 2,52 | 1,43 | FAIL |
| CDAN1     | Q8IWIY9    | codanin 1                                                     | 2,52 | 3,49 | FAIL |
| PRDM9     | Q9NQV7     | PR/SET domain 9                                               | 2,52 | 2,90 | FAIL |
| CUL5      | Q93034     | cullin 5                                                      | 2,52 | 2,07 | FAIL |
| SRP9      | Q6P2S0     | signal recognition particle 9                                 | 2,52 | 1,63 | FAIL |
| TSFM      | P43897     | Ts translation elongation factor, mitochondrial               | 2,52 | 1,34 | FAIL |
| PCM1      | E7EV93     | pericentriolar material 1                                     | 2,51 | 2,30 | FAIL |
| GRPEL1    | Q9HAV7     | GrpE like 1, mitochondrial                                    | 2,51 | 1,34 | FAIL |
|           | B3KNS4     |                                                               | 2,51 | 2,42 | FAIL |
| SLC12A7   | Q9Y666     | solute carrier family 12 member 7                             | 2,51 | 1,90 | FAIL |
| CCT8      | P50990     | chaperonin containing TCP1 subunit 8                          | 2,51 | 3,56 | FAIL |
| PHF10     | Q8WUB8     | PHD finger protein 10                                         | 2,51 | 1,48 | FAIL |
| IMPDH2    | H0Y4R1     | inosine monophosphate dehydrogenase 2                         | 2,51 | 2,45 | FAIL |
| SCML2     | Q9UQR0     | Scm polycomb group protein like 2                             | 2,51 | 1,62 | FAIL |
| MPHOSPH10 | O00566     | M-phase phosphoprotein 10                                     | 2,51 | 1,79 | FAIL |
| CNOT2     | F8VV52     | CCR4-NOT transcription complex subunit 2                      | 2,50 | 1,73 | FAIL |
| GAPVD1    | Q14C86     | GTPase activating protein and VPS9 domains 1                  | 2,50 | 4,05 | FAIL |
| CPOX      | P36551     | coproporphyrinogen oxidase                                    | 2,50 | 1,67 | FAIL |
| SMNDC1    | O75940     | survival motor neuron domain containing 1                     | 2,50 | 2,14 | FAIL |
| NOL8      | Q76FK4     | nucleolar protein 8                                           | 2,50 | 2,44 | FAIL |
| RICTOR    | Q6R327     | RPTOR independent companion of MTOR complex 2                 | 2,50 | 2,04 | FAIL |
| PEX5      | P50542     | peroxisomal biogenesis factor 5                               | 2,50 | 2,51 | FAIL |
| ADRM1     | Q16186     | ADRM1 26S proteasome ubiquitin receptor                       | 2,50 | 1,56 | FAIL |
| ICAM3     | P32942     | intercellular adhesion molecule 3                             | 2,49 | 4,27 | FAIL |
| CGGBP1    | Q9UFW8     | CGG triplet repeat binding protein 1                          | 2,49 | 1,49 | FAIL |
| PAIP2     | Q9BPZ3     | poly(A) binding protein interacting protein 2                 | 2,49 | 3,23 | FAIL |
| ISG15     | A0A096LNZ9 | ISG15 ubiquitin like modifier                                 | 2,49 | 3,82 | FAIL |
|           | A0A087WUX8 |                                                               | 2,49 | 2,84 | FAIL |
| BCR       | P11274     | BCR activator of RhoGEF and GTPase                            | 2,49 | 2,45 | FAIL |
| CD3G      | P09693     | CD3 gamma subunit of T-cell receptor complex                  | 2,48 | 1,97 | FAIL |
| RAP2B     | P61225     | RAP2B, member of RAS oncogene family                          | 2,48 | 3,13 | FAIL |
| ZC3HAV1L  | Q96H79     | zinc finger CCH-type containing, antiviral 1 like             | 2,48 | 1,82 | FAIL |
| PXDN      | Q92626     | peroxidase                                                    | 2,48 | 1,54 | FAIL |
| EPS15     | P42566     | epidermal growth factor receptor pathway substrate 15         | 2,48 | 1,72 | FAIL |

|           |            |                                                                   |      |      |      |
|-----------|------------|-------------------------------------------------------------------|------|------|------|
| SHC1      | P29353     | SHC adaptor protein 1                                             | 2,48 | 6,87 | FAIL |
| GID8      | Q9NWU2     | GID complex subunit 8 homolog                                     | 2,48 | 1,89 | FAIL |
| CALM2     | P0DP25     | calmodulin 2                                                      | 2,47 | 2,20 | FAIL |
| M6PR      | P20645     | mannose-6-phosphate receptor, cation dependent                    | 2,47 | 1,52 | FAIL |
| PDXDC1    | Q6P996     | pyridoxal dependent decarboxylase domain containing<br>1          | 2,47 | 1,37 | FAIL |
| PREB      | Q9HCU5     | prolactin regulatory element binding                              | 2,46 | 2,22 | FAIL |
| SAAL1     | J3KND1     | serum amyloid A like 1                                            | 2,46 | 2,98 | FAIL |
| MUS81     | H0YDE3     | MUS81 structure-specific endonuclease subunit                     | 2,46 | 3,40 | FAIL |
| HSPBP1    | Q9NZL4     | HSPA (Hsp70) binding protein 1                                    | 2,46 | 2,53 | FAIL |
| CETN2     | P41208     | centrin 2                                                         | 2,46 | 3,73 | FAIL |
| MRPL4     | K7ELF1     | mitochondrial ribosomal protein L4                                | 2,46 | 1,86 | FAIL |
| POLR3B    | Q9NW08     | RNA polymerase III subunit B                                      | 2,46 | 2,61 | FAIL |
| SCFD2     | Q8WU76     | sec1 family domain containing 2                                   | 2,46 | 2,10 | FAIL |
| TXNRD1    | Q16881     | thioredoxin reductase 1                                           | 2,46 | 1,98 | FAIL |
| VPS37A    | Q8NEZ2     | VPS37A subunit of ESCRT-I                                         | 2,45 | 3,06 | FAIL |
| ELAC2     | Q9BQ52     | elaC ribonuclease Z 2                                             | 2,45 | 1,78 | FAIL |
| KIDINS220 | Q9ULH0     | kinase D interacting substrate 220                                | 2,45 | 2,96 | FAIL |
| NEDD4L    | A0A6Q8PFI7 | NEDD4 like E3 ubiquitin protein ligase                            | 2,45 | 2,00 | FAIL |
| DMAP1     | Q9NPF5     | DNA methyltransferase 1 associated protein 1                      | 2,45 | 1,52 | FAIL |
| RPA3      | B5MC59     | replication protein A3                                            | 2,45 | 1,67 | FAIL |
| FYN       | P06241     | FYN proto-oncogene, Src family tyrosine kinase                    | 2,45 | 2,89 | FAIL |
| TNPO2     | O14787     | transportin 2                                                     | 2,45 | 1,40 | FAIL |
| PPM1G     | O15355     | protein phosphatase, Mg2+/Mn2+ dependent 1G                       | 2,45 | 3,83 | FAIL |
| DPP9      | Q86TI2     | dipeptidyl peptidase 9                                            | 2,45 | 3,38 | FAIL |
| TXNL1     | K7ER96     | thioredoxin like 1                                                | 2,44 | 1,90 | FAIL |
| YEATS4    | F8W0J4     | YEATS domain containing 4                                         | 2,44 | 4,07 | FAIL |
| RTN4      | Q9NQC3     | reticulin 4                                                       | 2,44 | 2,25 | FAIL |
| RPIA      | P49247     | ribose 5-phosphate isomerase A                                    | 2,44 | 4,24 | FAIL |
| DDX59     | Q5T1V6     | DEAD-box helicase 59                                              | 2,44 | 2,51 | FAIL |
| PDCD2L    | Q9BRP1     | programmed cell death 2 like                                      | 2,44 | 1,65 | FAIL |
| HLA-C     | A0A140T9H5 | major histocompatibility complex, class I, C                      | 2,44 | 3,83 | FAIL |
| PIGK      | Q92643     | phosphatidylinositol glycan anchor biosynthesis class K           | 2,44 | 1,99 | FAIL |
| POLR2J    | P52435     | RNA polymerase II subunit J                                       | 2,44 | 1,90 | FAIL |
| BRD7      | Q9NPI1     | bromodomain containing 7                                          | 2,44 | 1,67 | FAIL |
| RNF214    | Q8ND24     | ring finger protein 214                                           | 2,44 | 3,36 | FAIL |
| FAM98B    | Q52LJ0     | family with sequence similarity 98 member B                       | 2,44 | 2,07 | FAIL |
| NDUFB3    | O43676     | NADH:ubiquinone oxidoreductase subunit B3                         | 2,43 | 1,96 | FAIL |
| MBLAC2    | Q68D91     | metallo-beta-lactamase domain containing 2                        | 2,43 | 2,92 | FAIL |
| WAPL      | Q7Z5K2     | WAPL cohesin release factor                                       | 2,43 | 2,81 | FAIL |
| LRCH3     | Q96II8     | leucine rich repeats and calponin homology domain<br>containing 3 | 2,43 | 2,20 | FAIL |
| ABI3      | Q9P2A4     | ABI family member 3                                               | 2,43 | 3,04 | FAIL |
| OSTF1     | Q92882     | osteoclast stimulating factor 1                                   | 2,43 | 2,16 | FAIL |
| INTS2     | J3KMZ7     | integrator complex subunit 2                                      | 2,43 | 1,59 | FAIL |
| TNRC6C    | Q9HCJ0     | trinucleotide repeat containing adaptor 6C                        | 2,43 | 2,22 | FAIL |
| VPS26C    | A8MTY9     | VPS26 endosomal protein sorting factor C                          | 2,43 | 1,39 | FAIL |

|          |            |                                                     |      |      |      |
|----------|------------|-----------------------------------------------------|------|------|------|
| GLRX3    | O76003     | glutaredoxin 3                                      | 2,42 | 4,05 | FAIL |
| EIF4H    | Q15056     | eukaryotic translation initiation factor 4H         | 2,42 | 2,84 | FAIL |
| DGKH     | Q86XP1     | diacylglycerol kinase eta                           | 2,42 | 1,91 | FAIL |
| GNAI3    | P08754     | G protein subunit alpha i3                          | 2,42 | 2,57 | FAIL |
| PDCD6IP  | F8WBR8     | programmed cell death 6 interacting protein         | 2,42 | 2,41 | FAIL |
| PABPC1   | A0A087WTT1 | poly(A) binding protein cytoplasmic 1               | 2,42 | 2,11 | FAIL |
| SNX27    | Q96L92     | sorting nexin 27                                    | 2,42 | 2,19 | FAIL |
| ENDOD1   | O94919     | endonuclease domain containing 1                    | 2,42 | 1,56 | FAIL |
| DDX20    | Q9UHI6     | DEAD-box helicase 20                                | 2,42 | 1,97 | FAIL |
|          | Q32Q12     |                                                     | 2,41 | 1,93 | FAIL |
| CAB39    | Q9Y376     | calcium binding protein 39                          | 2,41 | 1,47 | FAIL |
| DLGAP5   | Q15398     | DLG associated protein 5                            | 2,41 | 2,24 | FAIL |
| ITPR1    | A0A3F2YNW8 | inositol 1,4,5-trisphosphate receptor type 1        | 2,41 | 1,49 | FAIL |
| TRIP4    | H0YL91     | thyroid hormone receptor interactor 4               | 2,41 | 1,70 | FAIL |
| TULP3    | O75386     | TUB like protein 3                                  | 2,41 | 1,99 | FAIL |
| SEC23B   | Q15437     | SEC23 homolog B, COPII coat complex component       | 2,41 | 2,05 | FAIL |
| DENR     | O43583     | density regulated re-initiation and release factor  | 2,41 | 2,33 | FAIL |
| CNDP2    | Q96KP4     | carnosine dipeptidase 2                             | 2,41 | 2,56 | FAIL |
| KNTC1    | P50748     | kinetochore associated 1                            | 2,40 | 2,92 | FAIL |
| PAXIP1   | Q6ZW49     | PAX interacting protein 1                           | 2,40 | 1,48 | FAIL |
| HMGXB4   | B0QXZ9     | HMG-box containing 4                                | 2,40 | 1,92 | FAIL |
|          | A0A0J9YWL0 |                                                     | 2,40 | 1,91 | FAIL |
| NDRG3    | Q5TH30     | NDRG family member 3                                | 2,40 | 1,66 | FAIL |
| MGST3    | O14880     | microsomal glutathione S-transferase 3              | 2,40 | 1,33 | FAIL |
| GPR89B   | P0CG08     | G protein-coupled receptor 89B                      | 2,40 | 2,13 | FAIL |
| TOMM22   | Q9NS69     | translocase of outer mitochondrial membrane 22      | 2,40 | 1,42 | FAIL |
| MDC1     | Q14676     | mediator of DNA damage checkpoint 1                 | 2,40 | 3,30 | FAIL |
| HNRNPLL  | Q8WVV9     | heterogeneous nuclear ribonucleoprotein L like      | 2,40 | 2,04 | FAIL |
| PTPN6    | P29350     | protein tyrosine phosphatase non-receptor type 6    | 2,40 | 2,18 | FAIL |
| INTS1    | Q8N201     | integrator complex subunit 1                        | 2,40 | 1,59 | FAIL |
| NSMCE3   | Q96MG7     | NSE3 homolog, SMC5-SMC6 complex component           | 2,40 | 2,39 | FAIL |
| ZZEF1    | O43149     | zinc finger ZZ-type and EF-hand domain containing 1 | 2,40 | 2,41 | FAIL |
| STARD3NL | O95772     | STARD3 N-terminal like                              | 2,40 | 1,76 | FAIL |
| IGF2BP3  | O00425     | insulin like growth factor 2 mRNA binding protein 3 | 2,39 | 2,50 | FAIL |
| CLASP2   | E3W994     | cytoplasmic linker associated protein 2             | 2,39 | 2,29 | FAIL |
| ZGPAT    | Q8N5A5     | zinc finger CCCH-type and G-patch domain containing | 2,39 | 1,49 | FAIL |
| GON4L    | Q3T8J9     | gon-4 like                                          | 2,39 | 2,79 | FAIL |
| ALG5     | Q9Y673     | ALG5 dolichyl-phosphate beta-glucosyltransferase    | 2,38 | 1,64 | FAIL |
| FBXO6    | Q9NRD1     | F-box protein 6                                     | 2,38 | 1,93 | FAIL |
| NCKAP1   | Q9Y2A7     | NCK associated protein 1                            | 2,38 | 2,46 | FAIL |
| CCT2     | P78371     | chaperonin containing TCP1 subunit 2                | 2,38 | 2,51 | FAIL |
| ZNF207   | X6R4W8     | zinc finger protein 207                             | 2,38 | 1,80 | FAIL |
| FEN1     | P39748     | flap structure-specific endonuclease 1              | 2,37 | 1,84 | FAIL |
| SMC6     | Q96SB8     | structural maintenance of chromosomes 6             | 2,37 | 1,57 | FAIL |
| TTK      | P33981     | TTK protein kinase                                  | 2,37 | 1,97 | FAIL |
| SEC23IP  | Q9Y6Y8     | SEC23 interacting protein                           | 2,37 | 1,51 | FAIL |
| ACTB     | P60709     | actin beta                                          | 2,37 | 2,80 | FAIL |
| MRPS31   | Q92665     | mitochondrial ribosomal protein S31                 | 2,37 | 1,32 | FAIL |

|          |            |                                                                  |      |      |      |
|----------|------------|------------------------------------------------------------------|------|------|------|
| LDHB     | A0A5F9ZHM4 | lactate dehydrogenase B                                          | 2,37 | 3,73 | FAIL |
| SMCR8    | Q8TEV9     | SMCR8-C9orf72 complex subunit                                    | 2,37 | 1,93 | FAIL |
| MRPL39   | C9JG87     | mitochondrial ribosomal protein L39                              | 2,37 | 1,94 | FAIL |
| SLC25A24 | Q6NUK1     | solute carrier family 25 member 24                               | 2,37 | 3,48 | FAIL |
| AHCYL1   | O43865     | adenosylhomocysteinase like 1                                    | 2,37 | 2,34 | FAIL |
| CPSF1    | Q10570     | cleavage and polyadenylation specific factor 1                   | 2,37 | 3,13 | FAIL |
| GBF1     | Q92538     | golgi brefeldin A resistant guanine nucleotide exchange factor 1 | 2,37 | 1,55 | FAIL |
| SNAP29   | O95721     | synaptosome associated protein 29                                | 2,36 | 2,94 | FAIL |
| BMS1     | Q14692     | BMS1 ribosome biogenesis factor                                  | 2,36 | 1,76 | FAIL |
| NDE1     | A0A6Q8PGV6 | nudE neurodevelopment protein 1                                  | 2,36 | 3,38 | FAIL |
| CYB5B    | H3BUX2     | cytochrome b5 type B                                             | 2,36 | 1,48 | FAIL |
| GOLGA4   | H0Y6I0     | golgin A4                                                        | 2,36 | 2,92 | FAIL |
| PHKB     | I3L213     | phosphorylase kinase regulatory subunit beta                     | 2,36 | 3,81 | FAIL |
| PPP1R12C | Q9BZL4     | protein phosphatase 1 regulatory subunit 12C                     | 2,35 | 1,69 | FAIL |
| HEXIM1   | O94992     | HEXIM P-TEFb complex subunit 1                                   | 2,35 | 2,11 | FAIL |
| TRAPPC9  | Q96Q05     | trafficking protein particle complex subunit 9                   | 2,35 | 3,08 | FAIL |
| NCKAP1L  | P55160     | NCK associated protein 1 like                                    | 2,35 | 4,21 | FAIL |
| LCMT1    | Q9UIC8     | leucine carboxyl methyltransferase 1                             | 2,35 | 1,42 | FAIL |
| MAP4K2   | Q12851     | mitogen-activated protein kinase kinase kinase kinase 2          | 2,35 | 1,60 | FAIL |
| FAM111B  | Q6SJ93     | FAM111 trypsin like peptidase B                                  | 2,35 | 1,34 | FAIL |
| NDC1     | Q9BTX1     | NDC1 transmembrane nucleoporin                                   | 2,35 | 1,32 | FAIL |
| HNRNPUL1 | Q9BUJ2     | heterogeneous nuclear ribonucleoprotein U like 1                 | 2,35 | 2,73 | FAIL |
| POLR2H   | C9JLU1     | RNA polymerase II, I and III subunit H                           | 2,35 | 1,69 | FAIL |
| SH3GLB2  | B7ZC38     | SH3 domain containing GRB2 like, endophilin B2                   | 2,35 | 1,76 | FAIL |
| CYP20A1  | Q6UW02     | cytochrome P450 family 20 subfamily A member 1                   | 2,35 | 1,97 | FAIL |
| PEAK1    | Q9H792     | pseudopodium enriched atypical kinase 1                          | 2,34 | 2,72 | FAIL |
| GTSE1    | Q9NYZ3     | G2 and S-phase expressed 1                                       | 2,34 | 1,71 | FAIL |
| CC2D1A   | Q6P1N0     | coiled-coil and C2 domain containing 1A                          | 2,34 | 2,62 | FAIL |
| USP9Y    | O00507     | ubiquitin specific peptidase 9 Y-linked                          | 2,34 | 2,16 | FAIL |
| FBXL12   | Q9NXK8     | F-box and leucine rich repeat protein 12                         | 2,34 | 1,86 | FAIL |
| HAUS3    | Q68CZ6     | HAUS augmin like complex subunit 3                               | 2,34 | 3,40 | FAIL |
| TNPO1    | Q92973     | transportin 1                                                    | 2,34 | 1,45 | FAIL |
| RAPGEF5  | A8MQ07     | Rap guanine nucleotide exchange factor 5                         | 2,34 | 2,62 | FAIL |
| CIZ1     | F5H2X7     | CDKN1A interacting zinc finger protein 1                         | 2,34 | 2,02 | FAIL |
| BUB1     | O43683     | BUB1 mitotic checkpoint serine/threonine kinase                  | 2,34 | 2,03 | FAIL |
| OSBPL3   | Q9H4L5     | oxysterol binding protein like 3                                 | 2,34 | 2,30 | FAIL |
| UBA1     | P22314     | ubiquitin like modifier activating enzyme 1                      | 2,34 | 2,94 | FAIL |
| YES1     | J3QRU1     | YES proto-oncogene 1, Src family tyrosine kinase                 | 2,34 | 2,45 | FAIL |
| KAT6A    | A0A3F2YNX6 | lysine acetyltransferase 6A                                      | 2,33 | 2,21 | FAIL |
| MAVS     | Q7Z434     | mitochondrial antiviral signaling protein                        | 2,33 | 3,03 | FAIL |
| N4BP2    | Q86UW6     | NEDD4 binding protein 2                                          | 2,33 | 3,17 | FAIL |
| SCAMP3   | O14828     | secretory carrier membrane protein 3                             | 2,33 | 2,45 | FAIL |
| GTF3C4   | Q9UKN8     | general transcription factor IIIC subunit 4                      | 2,33 | 2,70 | FAIL |
| AP5B1    | Q2VPB7     | adaptor related protein complex 5 subunit beta 1                 | 2,33 | 1,33 | FAIL |
| FARS2    | A0A3B3ITR6 | phenylalanyl-tRNA synthetase 2, mitochondrial                    | 2,33 | 1,93 | FAIL |
| DDX6     | P26196     | DEAD-box helicase 6                                              | 2,33 | 2,15 | FAIL |



|            |            |                                                                             |      |      |      |
|------------|------------|-----------------------------------------------------------------------------|------|------|------|
| MAP3K4     | F5H538     | mitogen-activated protein kinase kinase kinase 4                            | 2,33 | 1,74 | FAIL |
| TGS1       | Q96R50     | trimethylguanosine synthase 1                                               | 2,33 | 1,61 | FAIL |
| PREP       | P48147     | prolyl endopeptidase                                                        | 2,33 | 3,17 | FAIL |
| STXBP3     | O00186     | syntaxin binding protein 3                                                  | 2,33 | 3,71 | FAIL |
| RMC1       | K7ENL9     | regulator of MON1-CCZ1                                                      | 2,33 | 2,62 | FAIL |
| YWHAZ      | P63104     | tyrosine 3-monooxygenase/tryptophan 5-monooxygenase activation protein zeta | 2,32 | 3,99 | FAIL |
| PLK1       | P53350     | polo like kinase 1                                                          | 2,32 | 2,90 | FAIL |
| KIAA1217   | Q5T5P2     | KIAA1217                                                                    | 2,32 | 3,58 | FAIL |
| AKT1       | P31749     | AKT serine/threonine kinase 1                                               | 2,32 | 2,27 | FAIL |
| COMMD6     | Q7Z4G1     | COMM domain containing 6                                                    | 2,32 | 1,39 | FAIL |
| EEF1G      | P26641     | eukaryotic translation elongation factor 1 gamma                            | 2,32 | 4,65 | FAIL |
| VAC14      | Q08AM6     | VAC14 component of PIKFYVE complex                                          | 2,32 | 1,97 | FAIL |
| NARS1      | O43776     | asparaginyl-tRNA synthetase 1                                               | 2,32 | 2,40 | FAIL |
| UTP20      | O75691     | UTP20 small subunit processome component                                    | 2,32 | 1,55 | FAIL |
| VPS18      | Q9P253     | VPS18 core subunit of CORVET and HOPS complexes                             | 2,32 | 2,02 | FAIL |
| TUBGCP5    | Q96RT8     | tubulin gamma complex component 5                                           | 2,32 | 3,13 | FAIL |
| AKAP9      | A0A0A0MRF6 | A-kinase anchoring protein 9                                                | 2,32 | 1,75 | FAIL |
| VAMP7      | P51809     | vesicle associated membrane protein 7                                       | 2,31 | 1,89 | FAIL |
| MDM4       | A0A087WZ58 | MDM4 regulator of p53                                                       | 2,31 | 2,16 | FAIL |
| NDUFB1     | O75438     | NADH:ubiquinone oxidoreductase subunit B1                                   | 2,31 | 2,00 | FAIL |
| KIAA0930   | Q6ICG6     | KIAA0930                                                                    | 2,31 | 2,73 | FAIL |
| FASTKD1    | Q53R41     | FAST kinase domains 1                                                       | 2,31 | 1,70 | FAIL |
| KDM2B      | Q8NHM5     | lysine demethylase 2B                                                       | 2,31 | 1,80 | FAIL |
| PABPC4     | Q13310     | poly(A) binding protein cytoplasmic 4                                       | 2,31 | 1,90 | FAIL |
| BICD2      | Q8TD16     | BICD cargo adaptor 2                                                        | 2,31 | 2,93 | FAIL |
| PHKB       | Q93100     | phosphorylase kinase regulatory subunit beta                                | 2,31 | 3,49 | FAIL |
| ZFYVE1     | G3V5N8     | zinc finger FYVE-type containing 1                                          | 2,31 | 1,48 | FAIL |
| RANBP1     | P43487     | RAN binding protein 1                                                       | 2,30 | 1,85 | FAIL |
| NOL4L      | A0A087X0N3 | nucleolar protein 4 like                                                    | 2,30 | 1,72 | FAIL |
| RHOT2      | Q8IXI1     | ras homolog family member T2                                                | 2,30 | 1,45 | FAIL |
| TJP2       | Q9UDY2     | tight junction protein 2                                                    | 2,30 | 4,13 | FAIL |
| CGN        | Q9P2M7     | cingulin                                                                    | 2,30 | 1,55 | FAIL |
| TRAPPC3    | O43617     | trafficking protein particle complex subunit 3                              | 2,30 | 1,50 | FAIL |
| MSL2       | Q9HCI7     | MSL complex subunit 2                                                       | 2,30 | 3,26 | FAIL |
| GTPBP1     | O00178     | GTP binding protein 1                                                       | 2,30 | 3,34 | FAIL |
| AGAP3      | Q96P47     | ArfGAP with GTPase domain, ankyrin repeat and PH domain 3                   | 2,30 | 1,37 | FAIL |
| AP1S1      | A0A2R8YGH5 | adaptor related protein complex 1 subunit sigma 1                           | 2,30 | 2,41 | FAIL |
| AFTPH      | Q6ULP2     | aftiphilin                                                                  | 2,30 | 1,56 | FAIL |
| ANKFY1     | Q9P2R3     | ankyrin repeat and FYVE domain containing 1                                 | 2,30 | 1,83 | FAIL |
| PSMD7      | P51665     | proteasome 26S subunit, non-ATPase 7                                        | 2,29 | 2,29 | FAIL |
| GPR75-ASB3 | Q9Y575     | GPR75-ASB3 readthrough                                                      | 2,29 | 1,36 | FAIL |
| VAPB       | O95292     | VAMP associated protein B and C                                             | 2,29 | 2,32 | FAIL |
| NRAS       | P01111     | NRAS proto-oncogene, GTPase                                                 | 2,29 | 1,82 | FAIL |
| TUBGCP6    | E7EQL8     | tubulin gamma complex component 6                                           | 2,29 | 4,15 | FAIL |

|          |            |                                                          |      |      |      |
|----------|------------|----------------------------------------------------------|------|------|------|
| PDE4DIP  | E9PQG4     | phosphodiesterase 4D interacting protein                 | 2,29 | 2,31 | FAIL |
| ZFP36L2  | P47974     | ZFP36 ring finger protein like 2                         | 2,29 | 2,10 | FAIL |
| THADA    | Q6YHU6     | THADA armadillo repeat containing                        | 2,29 | 1,56 | FAIL |
| ADA      | P00813     | adenosine deaminase                                      | 2,29 | 4,42 | FAIL |
| G6PD     | P11413     | glucose-6-phosphate dehydrogenase                        | 2,28 | 4,93 | FAIL |
| EIF3I    | Q13347     | eukaryotic translation initiation factor 3 subunit I     | 2,28 | 3,00 | FAIL |
| CAND1    | Q86VP6     | cullin associated and neddylation dissociated 1          | 2,28 | 2,75 | FAIL |
| PPP1R7   | C9JD73     | protein phosphatase 1 regulatory subunit 7               | 2,28 | 2,07 | FAIL |
| LZTS1    | Q9Y250     | leucine zipper tumor suppressor 1                        | 2,28 | 2,55 | FAIL |
| MED11    | Q9P086     | mediator complex subunit 11                              | 2,28 | 3,14 | FAIL |
| LANCL2   | Q9NS86     | LanC like glutathione S-transferase 2                    | 2,28 | 2,30 | FAIL |
| ZNHIT6   | Q9NWK9     | zinc finger HIT-type containing 6                        | 2,28 | 2,61 | FAIL |
| METTL15  | A6NJ78     | methyltransferase 15, mitochondrial 12S rRNA N4-cytidine | 2,28 | 1,59 | FAIL |
| GALK1    | P51570     | galactokinase 1                                          | 2,27 | 1,74 | FAIL |
|          | A0A0G2JMG9 |                                                          | 2,27 | 2,26 | FAIL |
| SLBP     | F8W8D3     | stem-loop histone mRNA binding protein                   | 2,27 | 1,46 | FAIL |
| BLTP3A   | Q6BDS2     | bridge-like lipid transfer protein family member 3A      | 2,27 | 2,08 | FAIL |
| TRIM32   | Q13049     | tripartite motif containing 32                           | 2,27 | 1,55 | FAIL |
| NDUFV1   | G3V0I5     | NADH:ubiquinone oxidoreductase core subunit V1           | 2,27 | 1,72 | FAIL |
| PDCD10   | C9JND6     | programmed cell death 10                                 | 2,27 | 1,83 | FAIL |
| CCNK     | O75909     | cyclin K                                                 | 2,27 | 2,46 | FAIL |
| WDR59    | Q6PJI9     | WD repeat domain 59                                      | 2,27 | 2,02 | FAIL |
| HNRNPD   | Q14103     | heterogeneous nuclear ribonucleoprotein D                | 2,27 | 1,90 | FAIL |
| ALG6     | S4R350     | ALG6 alpha-1,3-glucosyltransferase                       | 2,27 | 2,24 | FAIL |
| PDE3B    | Q13370     | phosphodiesterase 3B                                     | 2,27 | 1,83 | FAIL |
| TERF2IP  | Q9NYB0     | TERF2 interacting protein                                | 2,26 | 1,66 | FAIL |
| ILKAP    | Q9H0C8     | ILK associated serine/threonine phosphatase              | 2,26 | 2,02 | FAIL |
| PGD      | P52209     | phosphogluconate dehydrogenase                           | 2,26 | 3,62 | FAIL |
| BECN1    | Q14457     | beclin 1                                                 | 2,26 | 2,13 | FAIL |
| RPP25L   | Q8N5L8     | ribonuclease P/MRP subunit p25 like                      | 2,26 | 3,50 | FAIL |
|          | J3QTR3     |                                                          | 2,26 | 1,57 | FAIL |
| ITGA4    | P13612     | integrin subunit alpha 4                                 | 2,25 | 2,53 | FAIL |
| METTL2B  | Q6P1Q9     | methyltransferase 2B, tRNA N3-cytidine                   | 2,25 | 2,93 | FAIL |
| RCN2     | Q14257     | reticulocalbin 2                                         | 2,25 | 1,63 | FAIL |
| PHKG2    | J3KNN3     | phosphorylase kinase catalytic subunit gamma 2           | 2,25 | 2,12 | FAIL |
| EDRF1    | Q3B7T1     | erythroid differentiation regulatory factor 1            | 2,25 | 1,36 | FAIL |
| SEPTIN9  | Q9UHD8     | septin 9                                                 | 2,25 | 2,61 | FAIL |
| KIF13B   | Q9NQT8     | kinesin family member 13B                                | 2,25 | 2,27 | FAIL |
| URGCP    | Q8TCY9     | upregulator of cell proliferation                        | 2,25 | 1,93 | FAIL |
| CYFIP2   | E7EVJ5     | cytoplasmic FMR1 interacting protein 2                   | 2,24 | 3,44 | FAIL |
| ASF1A    | Q9Y294     | anti-silencing function 1A histone chaperone             | 2,24 | 2,56 | FAIL |
| HAUS8    | Q9BT25     | HAUS augmin like complex subunit 8                       | 2,24 | 3,05 | FAIL |
| MARCHF5  | Q9NX47     | membrane associated ring-CH-type finger 5                | 2,24 | 2,24 | FAIL |
|          | A0A2R8Y611 |                                                          | 2,24 | 1,73 | FAIL |
| STYXL2   | Q5VZP5     | serine/threonine/tyrosine interacting like 2             | 2,24 | 2,45 | FAIL |
| MAPKAPK3 | Q16644     | MAPK activated protein kinase 3                          | 2,24 | 2,44 | FAIL |
| BIN2     | Q9UBW5     | bridging integrator 2                                    | 2,24 | 2,67 | FAIL |

|          |            |                                                                              |      |      |      |
|----------|------------|------------------------------------------------------------------------------|------|------|------|
| PAK4     | O96013     | p21 (RAC1) activated kinase 4                                                | 2,24 | 2,22 | FAIL |
| TMEM209  | Q96SK2     | transmembrane protein 209                                                    | 2,24 | 2,21 | FAIL |
| NELFE    | P18615     | negative elongation factor complex member E                                  | 2,24 | 1,78 | FAIL |
| LLGL1    | Q15334     | LLGL scribble cell polarity complex component 1                              | 2,24 | 1,88 | FAIL |
| POLR1D   | P0DPB6     | RNA polymerase I and III subunit D                                           | 2,24 | 2,76 | FAIL |
| SLC25A46 | Q96AG3     | solute carrier family 25 member 46                                           | 2,23 | 1,89 | FAIL |
| KIF4A    | O95239     | kinesin family member 4A                                                     | 2,23 | 3,30 | FAIL |
| LSM14B   | Q9BX40     | LSM family member 14B                                                        | 2,23 | 1,98 | FAIL |
| CDC16    | Q13042     | cell division cycle 16                                                       | 2,23 | 2,01 | FAIL |
| PRAF2    | O60831     | PRA1 domain family member 2                                                  | 2,23 | 2,02 | FAIL |
| NRAP     | A0A0A0MRM2 | nebulin related anchoring protein                                            | 2,23 | 4,35 | FAIL |
| STX16    | O14662     | syntaxin 16                                                                  | 2,23 | 2,00 | FAIL |
| PTPRC    | P08575     | protein tyrosine phosphatase receptor type C                                 | 2,23 | 1,82 | FAIL |
| GNAS     | Q5JWF2     | GNAS complex locus                                                           | 2,23 | 2,19 | FAIL |
| TPR      | P12270     | translocated promoter region, nuclear basket protein                         | 2,23 | 2,30 | FAIL |
| PCM1     | A0A5H1ZRS1 | pericentriolar material 1                                                    | 2,23 | 4,88 | FAIL |
| EYA3     | Q99504     | EYA transcriptional coactivator and phosphatase 3                            | 2,22 | 3,36 | FAIL |
| MTOR     | P42345     | mechanistic target of rapamycin kinase                                       | 2,22 | 2,22 | FAIL |
| EXOSC10  | Q01780     | exosome component 10                                                         | 2,22 | 3,19 | FAIL |
| ORC4     | O43929     | origin recognition complex subunit 4                                         | 2,22 | 1,59 | FAIL |
| FANCD2   | Q9BXW9     | FA complementation group D2                                                  | 2,22 | 1,31 | FAIL |
| POLD2    | P49005     | DNA polymerase delta 2, accessory subunit                                    | 2,22 | 1,59 | FAIL |
| REXO1    | Q8N1G1     | RNA exonuclease 1 homolog                                                    | 2,22 | 1,51 | FAIL |
| YWHAG    | P61981     | tyrosine 3-monooxygenase/tryptophan 5-monooxygenase activation protein gamma | 2,22 | 4,43 | FAIL |
| CAPNS1   | P04632     | calpain small subunit 1                                                      | 2,22 | 1,31 | FAIL |
| GATB     | D6REA0     | glutamyl-tRNA amidotransferase subunit B                                     | 2,21 | 2,31 | FAIL |
| TRAFD1   | O14545     | TRAF-type zinc finger domain containing 1                                    | 2,21 | 4,09 | FAIL |
| TMPO     | P42166     | thymopoietin                                                                 | 2,21 | 4,01 | FAIL |
| MIER1    | Q8N108     | MIER1 transcriptional regulator                                              | 2,21 | 1,61 | FAIL |
| TMUB1    | Q9BVT8     | transmembrane and ubiquitin like domain containing 1                         | 2,21 | 1,41 | FAIL |
| TRIM56   | Q9BRZ2     | tripartite motif containing 56                                               | 2,21 | 3,19 | FAIL |
| ADAM10   | O14672     | ADAM metalloproteinase domain 10                                             | 2,21 | 2,63 | FAIL |
| DCTN3    | X6RCK5     | dynactin subunit 3                                                           | 2,21 | 4,31 | FAIL |
| SEPTIN1  | Q8WYJ6     | septin 1                                                                     | 2,21 | 4,03 | FAIL |
| AP1G2    | G3V2V9     | adaptor related protein complex 1 subunit gamma 2                            | 2,21 | 3,08 | FAIL |
| RASAL3   | Q86YV0     | RAS protein activator like 3                                                 | 2,21 | 2,19 | FAIL |
| TBC1D9B  | Q66K14     | TBC1 domain family member 9B                                                 | 2,20 | 2,14 | FAIL |
| NAP1L1   | H0YIV4     | nucleosome assembly protein 1 like 1                                         | 2,20 | 3,13 | FAIL |
| EPB41L5  | Q9HCM4     | erythrocyte membrane protein band 4.1 like 5                                 | 2,20 | 2,58 | FAIL |
| ZMYM4    | Q5VZL5     | zinc finger MYM-type containing 4                                            | 2,20 | 2,01 | FAIL |
| SYNCRIP  | O60506     | synaptotagmin binding cytoplasmic RNA interacting protein                    | 2,20 | 2,08 | FAIL |
| PPP2R2A  | P63151     | protein phosphatase 2 regulatory subunit Balpha                              | 2,20 | 2,14 | FAIL |
| SART3    | Q15020     | spliceosome associated factor 3, U4/U6 recycling protein                     | 2,20 | 1,31 | FAIL |
| SLC35B2  | Q8TB61     | solute carrier family 35 member B2                                           | 2,20 | 2,05 | FAIL |

|         |            |                                                                            |      |      |      |
|---------|------------|----------------------------------------------------------------------------|------|------|------|
| EIF5    | P55010     | eukaryotic translation initiation factor 5                                 | 2,20 | 1,89 | FAIL |
| KEAP1   | Q14145     | kelch like ECH associated protein 1                                        | 2,20 | 2,51 | FAIL |
| VAV2    | P52735     | vav guanine nucleotide exchange factor 2                                   | 2,20 | 1,40 | FAIL |
| GTF3C5  | Q9Y5Q8     | general transcription factor IIIC subunit 5                                | 2,20 | 2,62 | FAIL |
| UHRF1   | Q96T88     | ubiquitin like with PHD and ring finger domains 1                          | 2,20 | 2,56 | FAIL |
| STUB1   | Q9UNE7     | STIP1 homology and U-box containing protein 1                              | 2,19 | 4,05 | FAIL |
| NSDHL   | Q15738     | NAD(P) dependent steroid dehydrogenase-like                                | 2,19 | 1,47 | FAIL |
| STAT2   | P52630     | signal transducer and activator of transcription 2                         | 2,19 | 1,44 | FAIL |
| TRAPPC5 | Q8IUR0     | trafficking protein particle complex subunit 5                             | 2,19 | 1,95 | FAIL |
| BAG3    | O95817     | BAG cochaperone 3                                                          | 2,19 | 2,39 | FAIL |
| IKBKG   | Q9Y6K9     | inhibitor of nuclear factor kappa B kinase regulatory subunit gamma        | 2,19 | 2,43 | FAIL |
| SEC11A  | H0YNG3     | SEC11 homolog A, signal peptidase complex subunit                          | 2,19 | 1,68 | FAIL |
| PLAA    | Q9Y263     | phospholipase A2 activating protein                                        | 2,18 | 3,15 | FAIL |
| ACAP1   | Q15027     | ArfGAP with coiled-coil, ankyrin repeat and PH domains 1                   | 2,18 | 2,11 | FAIL |
| IPO7    | O95373     | importin 7                                                                 | 2,18 | 3,57 | FAIL |
| DCAF1   | Q9Y4B6     | DDB1 and CUL4 associated factor 1                                          | 2,18 | 1,98 | FAIL |
| WDR6    | A0A087X295 | WD repeat domain 6                                                         | 2,18 | 2,67 | FAIL |
| RPL37A  | P61513     | ribosomal protein L37a                                                     | 2,18 | 1,33 | FAIL |
| HK1     | P19367     | hexokinase 1                                                               | 2,18 | 1,32 | FAIL |
| PES1    | B5MCF9     | pescadillo ribosomal biogenesis factor 1                                   | 2,18 | 4,07 | FAIL |
| VPS51   | Q9UID3     | VPS51 subunit of GARP complex                                              | 2,18 | 3,94 | FAIL |
| GCDH    | Q92947     | glutaryl-CoA dehydrogenase                                                 | 2,18 | 1,65 | FAIL |
| YBX2    | Q9Y2T7     | Y-box binding protein 2                                                    | 2,17 | 2,25 | FAIL |
| HLA-B   | P01889     | major histocompatibility complex, class I, B                               | 2,17 | 2,17 | FAIL |
| ARFGAP2 | A0A0D9SF70 | ADP ribosylation factor GTPase activating protein 2                        | 2,17 | 3,85 | FAIL |
| EIF4A1  | P60842     | eukaryotic translation initiation factor 4A1                               | 2,17 | 2,23 | FAIL |
| LATS1   | O95835     | large tumor suppressor kinase 1                                            | 2,17 | 2,41 | FAIL |
| ATPAF2  | Q8N5M1     | ATP synthase mitochondrial F1 complex assembly factor 2                    | 2,17 | 1,33 | FAIL |
| GRK6    | F8W9W2     | G protein-coupled receptor kinase 6                                        | 2,17 | 3,34 | FAIL |
| SETD1A  | O15047     | SET domain containing 1A, histone lysine methyltransferase                 | 2,17 | 1,71 | FAIL |
| AKAP13  | Q12802     | A-kinase anchoring protein 13                                              | 2,17 | 2,87 | FAIL |
| IFT25   | A6NIR2     | intraflagellar transport 25                                                | 2,16 | 1,50 | FAIL |
| MICAL1  | Q8TDZ2     | microtubule associated monooxygenase, calponin and LIM domain containing 1 | 2,16 | 1,80 | FAIL |
| PGRMC1  | O00264     | progesterone receptor membrane component 1                                 | 2,16 | 5,11 | FAIL |
| GNAI2   | P04899     | G protein subunit alpha i2                                                 | 2,16 | 4,30 | FAIL |
| ANXA4   | P09525     | annexin A4                                                                 | 2,16 | 2,36 | FAIL |
| R3HDM2  | B5MCG9     | R3H domain containing 2                                                    | 2,16 | 1,66 | FAIL |
| PNPLA6  | A0A384DVU0 | patatin like phospholipase domain containing 6                             | 2,16 | 2,89 | FAIL |
| PPFIA3  | O75145     | PTPRF interacting protein alpha 3                                          | 2,16 | 4,20 | FAIL |
| SUMO1   | P63165     | small ubiquitin like modifier 1                                            | 2,16 | 2,02 | FAIL |
| TMEM87A | Q8NBN3     | transmembrane protein 87A                                                  | 2,16 | 1,88 | FAIL |

|           |            |                                                                   |      |      |      |
|-----------|------------|-------------------------------------------------------------------|------|------|------|
| PARP4     | Q9UKK3     | poly(ADP-ribose) polymerase family member 4                       | 2,16 | 1,58 | FAIL |
| EIF4G1    | Q04637     | eukaryotic translation initiation factor 4 gamma 1                | 2,16 | 1,73 | FAIL |
| C1QBP     | Q07021     | complement C1q binding protein                                    | 2,16 | 1,53 | FAIL |
| KIF7      | Q2M1P5     | kinesin family member 7                                           | 2,16 | 1,91 | FAIL |
| KMT2A     | Q03164     | lysine methyltransferase 2A                                       | 2,15 | 1,83 | FAIL |
| COMMD2    | Q86X83     | COMM domain containing 2                                          | 2,15 | 2,86 | FAIL |
| TUBE1     | S4R3K3     | tubulin epsilon 1                                                 | 2,15 | 1,32 | FAIL |
| MAP2K2    | P36507     | mitogen-activated protein kinase kinase 2                         | 2,15 | 1,47 | FAIL |
|           | H0Y6I6     |                                                                   | 2,15 | 1,80 | FAIL |
| RNF20     | Q5VTR2     | ring finger protein 20                                            | 2,15 | 2,74 | FAIL |
| SECISBP2L | Q93073     | SECIS binding protein 2 like                                      | 2,15 | 1,50 | FAIL |
| FBL       | P22087     | fibrillarin                                                       | 2,15 | 4,93 | FAIL |
| SERPINH1  | P50454     | serpin family H member 1                                          | 2,15 | 1,95 | FAIL |
| UQCC1     | Q9NVA1     | ubiquinol-cytochrome c reductase complex assembly factor 1        | 2,15 | 2,12 | FAIL |
| ATXN10    | Q9UBB4     | ataxin 10                                                         | 2,15 | 2,20 | FAIL |
| GABARAPL2 | H3BQ50     | GABA type A receptor associated protein like 2                    | 2,15 | 2,29 | FAIL |
| DNAJA1    | P31689     | DnaJ heat shock protein family (Hsp40) member A1                  | 2,15 | 2,65 | FAIL |
| SLC25A19  | Q9HC21     | solute carrier family 25 member 19                                | 2,14 | 1,62 | FAIL |
| PRIM1     | A0A5F9ZHB6 | DNA primase subunit 1                                             | 2,14 | 2,93 | FAIL |
| FGD6      | Q6ZV73     | FYVE, RhoGEF and PH domain containing 6                           | 2,14 | 1,56 | FAIL |
| HYOU1     | Q9Y4L1     | hypoxia up-regulated 1                                            | 2,14 | 1,70 | FAIL |
| CRTAP     | O75718     | cartilage associated protein                                      | 2,14 | 1,76 | FAIL |
| QRICH1    | Q2TAL8     | glutamine rich 1                                                  | 2,14 | 2,00 | FAIL |
| GPS1      | Q13098     | G protein pathway suppressor 1                                    | 2,14 | 1,83 | FAIL |
| OSGEP     | Q9NPF4     | O-sialoglycoprotein endopeptidase                                 | 2,14 | 3,46 | FAIL |
| NCAPG     | Q9BPX3     | non-SMC condensin I complex subunit G                             | 2,13 | 2,05 | FAIL |
| RAB8B     | Q92930     | RAB8B, member RAS oncogene family                                 | 2,13 | 2,10 | FAIL |
| FASN      | P49327     | fatty acid synthase                                               | 2,13 | 2,51 | FAIL |
| HNRNPAB   | Q99729     | heterogeneous nuclear ribonucleoprotein A/B                       | 2,13 | 2,31 | FAIL |
| RBM28     | Q9NW13     | RNA binding motif protein 28                                      | 2,13 | 2,78 | FAIL |
| FLII      | J3KS54     | FLII actin remodeling protein                                     | 2,13 | 4,90 | FAIL |
| TOMM40    | O96008     | translocase of outer mitochondrial membrane 40                    | 2,13 | 1,34 | FAIL |
| HDLBP     | Q00341     | high density lipoprotein binding protein                          | 2,13 | 3,72 | FAIL |
| TAMM41    | Q96BW9     | TAM41 mitochondrial translocator assembly and maintenance homolog | 2,13 | 1,56 | FAIL |
| WEE1      | E9PQ51     | WEE1 G2 checkpoint kinase                                         | 2,13 | 1,60 | FAIL |
| RAP1GDS1  | P52306     | Rap1 GTPase-GDP dissociation stimulator 1                         | 2,13 | 1,36 | FAIL |
| LRR1      | Q96L50     | leucine rich repeat protein 1                                     | 2,13 | 3,29 | FAIL |
| PRKD2     | Q9BZL6     | protein kinase D2                                                 | 2,13 | 1,61 | FAIL |
| CD3D      | P04234     | CD3 delta subunit of T-cell receptor complex                      | 2,13 | 3,15 | FAIL |
|           | A0A1B0GX12 |                                                                   | 2,13 | 3,80 | FAIL |
| MCUR1     | Q96AQ8     | mitochondrial calcium uniporter regulator 1                       | 2,12 | 1,77 | FAIL |
| ALG2      | Q9H553     | ALG2 alpha-1,3/1,6-mannosyltransferase                            | 2,12 | 1,45 | FAIL |
| KPNB1     | Q14974     | karyopherin subunit beta 1                                        | 2,12 | 2,68 | FAIL |
| TRIM14    | Q14142     | tripartite motif containing 14                                    | 2,12 | 3,02 | FAIL |

|          |            |                                                                            |      |      |      |
|----------|------------|----------------------------------------------------------------------------|------|------|------|
| VPS36    | Q86VN1     | vacuolar protein sorting 36 homolog                                        | 2,12 | 2,25 | FAIL |
| DNTTIP2  | Q5QJE6     | deoxynucleotidyltransferase terminal interacting protein 2                 | 2,12 | 3,40 | FAIL |
| RPL27    | P61353     | ribosomal protein L27                                                      | 2,12 | 4,38 | FAIL |
| CDC25C   | P30307     | cell division cycle 25C                                                    | 2,12 | 2,52 | FAIL |
| DTX3L    | Q8TDB6     | deltex E3 ubiquitin ligase 3L                                              | 2,12 | 1,33 | FAIL |
| UBLCP1   | Q8WVY7     | ubiquitin like domain containing CTD phosphatase 1                         | 2,12 | 1,37 | FAIL |
| COASY    | Q13057     | Coenzyme A synthase                                                        | 2,12 | 4,91 | FAIL |
|          | A0A0A0MTP3 |                                                                            | 2,12 | 2,52 | FAIL |
| PPP4R1   | Q8TF05     | protein phosphatase 4 regulatory subunit 1                                 | 2,12 | 3,52 | FAIL |
| AASDHPPT | Q9NRN7     | aminoadipate-semialdehyde dehydrogenase-phosphopantetheinyl transferase    | 2,12 | 1,46 | FAIL |
| CAMK2G   | A0A2Q3DQE3 | calcium/calmodulin dependent protein kinase II gamma                       | 2,12 | 4,24 | FAIL |
| PITPNM2  | Q9BZ72     | phosphatidylinositol transfer protein membrane associated 2                | 2,11 | 3,77 | FAIL |
| NAGK     | Q9UJ70     | N-acetylglucosamine kinase                                                 | 2,11 | 2,52 | FAIL |
| COG5     | Q9UP83     | component of oligomeric golgi complex 5                                    | 2,11 | 2,87 | FAIL |
| NUP188   | Q5SRE5     | nucleoporin 188                                                            | 2,11 | 1,87 | FAIL |
| MKRN2    | Q9H000     | makorin ring finger protein 2                                              | 2,11 | 2,59 | FAIL |
| GEMIN4   | I3L2C7     | gem nuclear organelle associated protein 4                                 | 2,11 | 2,57 | FAIL |
| PSMD11   | O00231     | proteasome 26S subunit, non-ATPase 11                                      | 2,11 | 2,04 | FAIL |
| ARMH3    | Q5T2E6     | armadillo like helical domain containing 3                                 | 2,11 | 2,12 | FAIL |
| CSDE1    | O75534     | cold shock domain containing E1                                            | 2,11 | 3,17 | FAIL |
| GET1     | B7Z1T1     | guided entry of tail-anchored proteins factor 1                            | 2,11 | 2,61 | FAIL |
| ZNF384   | Q8TF68     | zinc finger protein 384                                                    | 2,10 | 3,97 | FAIL |
| PPIL2    | Q13356     | peptidylprolyl isomerase like 2                                            | 2,10 | 3,09 | FAIL |
| ZC3H7A   | Q8IWR0     | zinc finger CCCH-type containing 7A                                        | 2,10 | 1,57 | FAIL |
| TTLL12   | Q14166     | tubulin tyrosine ligase like 12                                            | 2,10 | 2,81 | FAIL |
| YWHAH    | Q04917     | tyrosine 3-monooxygenase/tryptophan 5-monooxygenase activation protein eta | 2,10 | 4,06 | FAIL |
| B2M      | H0YLF3     | beta-2-microglobulin                                                       | 2,10 | 3,04 | FAIL |
| PEX5L    | Q8IYB4     | peroxisomal biogenesis factor 5 like                                       | 2,10 | 2,09 | FAIL |
| KLF16    | Q9BXX1     | KLF transcription factor 16                                                | 2,09 | 1,40 | FAIL |
| HCFC1    | A6NEM2     | host cell factor C1                                                        | 2,09 | 2,43 | FAIL |
| UBE3C    | Q15386     | ubiquitin protein ligase E3C                                               | 2,09 | 3,00 | FAIL |
| TMEM126A | Q9H061     | transmembrane protein 126A                                                 | 2,09 | 2,48 | FAIL |
| NSD2     | O96028     | nuclear receptor binding SET domain protein 2                              | 2,09 | 1,80 | FAIL |
| NBN      | O60934     | nibrin                                                                     | 2,09 | 2,10 | FAIL |
| TADA3    | O75528     | transcriptional adaptor 3                                                  | 2,09 | 1,32 | FAIL |
| FNDC3A   | Q9Y2H6     | fibronectin type III domain containing 3A                                  | 2,09 | 1,45 | FAIL |
| EMC8     | M0R1B0     | ER membrane protein complex subunit 8                                      | 2,09 | 1,71 | FAIL |
| UBE2L6   | O14933     | ubiquitin conjugating enzyme E2 L6                                         | 2,09 | 3,07 | FAIL |
| FAM234A  | B4DGG1     | family with sequence similarity 234 member A                               | 2,09 | 1,57 | FAIL |
| GPAA1    | E9PM11     | glycosylphosphatidylinositol anchor attachment 1                           | 2,09 | 1,83 | FAIL |
| PSMC4    | P43686     | proteasome 26S subunit, ATPase 4                                           | 2,09 | 1,54 | FAIL |
| CCDC191  | Q8NCU4     | coiled-coil domain containing 191                                          | 2,08 | 1,77 | FAIL |

|          |            |                                                                                                      |      |      |      |
|----------|------------|------------------------------------------------------------------------------------------------------|------|------|------|
| NEO1     | Q92859     | neogenin 1                                                                                           | 2,08 | 1,91 | FAIL |
| WASF2    | Q9Y6W5     | WASP family member 2                                                                                 | 2,08 | 2,60 | FAIL |
| SMARCE1  | A0A2R8Y855 | SWI/SNF related, matrix associated, actin dependent<br>regulator of chromatin, subfamily e, member 1 | 2,08 | 2,18 | FAIL |
| ELMO1    | Q92556     | engulfment and cell motility 1                                                                       | 2,08 | 3,15 | FAIL |
| KTN1     | Q86UP2     | kinectin 1                                                                                           | 2,08 | 2,85 | FAIL |
| ERCC6L   | Q2NKG8     | ERCC excision repair 6 like, spindle assembly check-<br>point helicase                               | 2,08 | 3,17 | FAIL |
| TYSND1   | Q2T9J0     | trypsin like peroxisomal matrix peptidase 1                                                          | 2,08 | 2,80 | FAIL |
| SLC25A11 | Q02978     | solute carrier family 25 member 11                                                                   | 2,08 | 1,33 | FAIL |
| THOC6    | Q86W42     | THO complex subunit 6                                                                                | 2,08 | 1,79 | FAIL |
| RAB2B    | Q8WUD1     | RAB2B, member RAS oncogene family                                                                    | 2,08 | 3,30 | FAIL |
| RAD21    | O60216     | RAD21 cohesin complex component                                                                      | 2,08 | 2,42 | FAIL |
| CAD      | P27708     | carbamoyl-phosphate synthetase 2, aspartate transcar-<br>bamylase, and dihydroorotase                | 2,08 | 3,09 | FAIL |
| CSNK2A2  | P19784     | casein kinase 2 alpha 2                                                                              | 2,08 | 2,70 | FAIL |
| MPG      | P29372     | N-methylpurine DNA glycosylase                                                                       | 2,08 | 1,91 | FAIL |
| AKNA     | Q7Z591     | AT-hook transcription factor                                                                         | 2,08 | 1,32 | FAIL |
| ATXN2    | F8WB06     | ataxin 2                                                                                             | 2,08 | 3,07 | FAIL |
| UBE4A    | Q14139     | ubiquitination factor E4A                                                                            | 2,08 | 1,43 | FAIL |
| MED22    | E7EN96     | mediator complex subunit 22                                                                          | 2,07 | 4,13 | FAIL |
| UTP11    | Q9Y3A2     | UTP11 small subunit processome component                                                             | 2,07 | 1,48 | FAIL |
| PIK3R2   | O00459     | phosphoinositide-3-kinase regulatory subunit 2                                                       | 2,07 | 1,82 | FAIL |
| BRF1     | Q92994     | BRF1 RNA polymerase III transcription initiation factor<br>subunit                                   | 2,07 | 1,95 | FAIL |
| CSNK2B   | P67870     | casein kinase 2 beta                                                                                 | 2,07 | 2,14 | FAIL |
| NPAT     | Q14207     | nuclear protein, coactivator of histone transcription                                                | 2,07 | 1,45 | FAIL |
| ZNF512B  | Q96KM6     | zinc finger protein 512B                                                                             | 2,07 | 2,11 | FAIL |
| EIF3K    | Q9UBQ5     | eukaryotic translation initiation factor 3 subunit K                                                 | 2,07 | 2,11 | FAIL |
| CLINT1   | Q14677     | clathrin interactor 1                                                                                | 2,07 | 2,29 | FAIL |
| RBBP7    | E9PC52     | RB binding protein 7, chromatin remodeling factor                                                    | 2,07 | 2,43 | FAIL |
| MCRS1    | Q96EZ8     | microspherule protein 1                                                                              | 2,07 | 2,65 | FAIL |
| KNOP1    | Q1ED39     | lysine rich nucleolar protein 1                                                                      | 2,07 | 2,29 | FAIL |
| TRNT1    | Q96Q11     | tRNA nucleotidyl transferase 1                                                                       | 2,07 | 2,91 | FAIL |
| C8orf33  | A0A3B3IT54 | chromosome 8 open reading frame 33                                                                   | 2,06 | 2,26 | FAIL |
| RWDD2A   | Q9UIY3     | RWD domain containing 2A                                                                             | 2,06 | 1,74 | FAIL |
| FBXO11   | Q86XK2     | F-box protein 11                                                                                     | 2,06 | 1,83 | FAIL |
| CDIN1    | H3BNF9     | CDAN1 interacting nuclease 1                                                                         | 2,06 | 1,59 | FAIL |
| USP24    | Q9UPU5     | ubiquitin specific peptidase 24                                                                      | 2,06 | 3,65 | FAIL |
| RP2      | O75695     | RP2 activator of ARL3 GTPase                                                                         | 2,06 | 4,16 | FAIL |
| CAAP1    | Q9H8G2     | caspase activity and apoptosis inhibitor 1                                                           | 2,06 | 1,55 | FAIL |
| LCK      | P06239     | LCK proto-oncogene, Src family tyrosine kinase                                                       | 2,06 | 2,23 | FAIL |
| GATD1    | H0YE25     | glutamine amidotransferase class 1 domain containing<br>1                                            | 2,06 | 1,49 | FAIL |
| SLC39A11 | J3KRX2     | solute carrier family 39 member 11                                                                   | 2,06 | 2,81 | FAIL |

|          |        |                                                       |      |      |      |
|----------|--------|-------------------------------------------------------|------|------|------|
| PIK3R4   | Q99570 | phosphoinositide-3-kinase regulatory subunit 4        | 2,06 | 3,37 | FAIL |
| GTF3C3   | Q9Y5Q9 | general transcription factor IIIC subunit 3           | 2,06 | 2,17 | FAIL |
| TBC1D10A | Q9BXI6 | TBC1 domain family member 10A                         | 2,06 | 1,63 | FAIL |
| ARFIP1   | P53367 | ADP ribosylation factor interacting protein 1         | 2,06 | 1,41 | FAIL |
| SLC16A7  | O60669 | solute carrier family 16 member 7                     | 2,06 | 1,39 | FAIL |
| RHOA     | P61586 | ras homolog family member A                           | 2,06 | 2,16 | FAIL |
| DPF2     | J3KMZ8 | double PHD fingers 2                                  | 2,05 | 1,54 | FAIL |
| SNF8     | Q96H20 | SNF8 subunit of ESCRT-II                              | 2,05 | 1,49 | FAIL |
| AGK      | E9PC15 | acylglycerol kinase                                   | 2,05 | 1,56 | FAIL |
| TROAP    | Q12815 | trophinin associated protein                          | 2,05 | 2,32 | FAIL |
| PUM1     | Q14671 | pumilio RNA binding family member 1                   | 2,05 | 2,35 | FAIL |
| ARIH1    | Q9Y4X5 | ariadne RBR E3 ubiquitin protein ligase 1             | 2,05 | 2,80 | FAIL |
| WAC      | Q9BTA9 | WW domain containing adaptor with coiled-coil         | 2,05 | 2,01 | FAIL |
| NAA15    | Q9BXJ9 | N-alpha-acetyltransferase 15, NatA auxiliary subunit  | 2,05 | 2,86 | FAIL |
| PCNT     | O95613 | pericentrin                                           | 2,05 | 1,62 | FAIL |
| GLS      | O94925 | glutaminase                                           | 2,05 | 1,75 | FAIL |
| GPR180   | Q86V85 | G protein-coupled receptor 180                        | 2,05 | 2,48 | FAIL |
| BRAT1    | Q6PJG6 | BRCA1 associated ATM activator 1                      | 2,04 | 1,74 | FAIL |
| PARP10   | E9PK67 | poly(ADP-ribose) polymerase family member 10          | 2,04 | 1,91 | FAIL |
| ZNG1B    | Q8IUF1 | Zn regulated GTPase metalloprotein activator 1B       | 2,04 | 1,87 | FAIL |
| PCGF6    | Q9BYE7 | polycomb group ring finger 6                          | 2,04 | 1,36 | FAIL |
| EFTUD2   | Q15029 | elongation factor Tu GTP binding domain containing 2  | 2,04 | 1,65 | FAIL |
| SPNS1    | H3BPQ9 | SPNS lysolipid transporter 1, lysophospholipid        | 2,04 | 2,19 | FAIL |
| KTI12    | Q96EK9 | KTI12 chromatin associated homolog                    | 2,04 | 1,50 | FAIL |
| NRM      | Q8IXM6 | nurim                                                 | 2,04 | 1,54 | FAIL |
| STIM1    | Q13586 | stromal interaction molecule 1                        | 2,04 | 3,16 | FAIL |
| CEP72    | Q9P209 | centrosomal protein 72                                | 2,04 | 2,50 | FAIL |
| MOGS     | Q13724 | mannosyl-oligosaccharide glucosidase                  | 2,04 | 2,91 | FAIL |
| RPL9     | P32969 | ribosomal protein L9                                  | 2,03 | 1,42 | FAIL |
| TRIP12   | Q14669 | thyroid hormone receptor interactor 12                | 2,03 | 2,42 | FAIL |
| SKIC8    | Q9GZS3 | SKI8 subunit of superkiller complex                   | 2,03 | 1,47 | FAIL |
| WTAP     | Q15007 | WT1 associated protein                                | 2,03 | 1,69 | FAIL |
| SCCPDH   | Q8NBX0 | saccharopine dehydrogenase (putative)                 | 2,03 | 3,39 | FAIL |
| OGFR     | Q9NZT2 | opioid growth factor receptor                         | 2,03 | 2,31 | FAIL |
| TRAF6    | Q9Y4K3 | TNF receptor associated factor 6                      | 2,03 | 2,67 | FAIL |
| SUPT5H   | O00267 | SPT5 homolog, DSIF elongation factor subunit          | 2,03 | 4,09 | FAIL |
| NUP50    | Q9UKX7 | nucleoporin 50                                        | 2,03 | 3,48 | FAIL |
| OSBP     | P22059 | oxysterol binding protein                             | 2,03 | 2,03 | FAIL |
| USP14    | P54578 | ubiquitin specific peptidase 14                       | 2,03 | 1,81 | FAIL |
| LRRC41   | Q15345 | leucine rich repeat containing 41                     | 2,03 | 2,20 | FAIL |
| OTULIN   | Q96BN8 | OTU deubiquitinase with linear linkage specificity    | 2,03 | 4,12 | FAIL |
| CFL1     | E9PK25 | cofilin 1                                             | 2,03 | 4,82 | FAIL |
| DCUN1D5  | Q9BTE7 | defective in cullin neddylation 1 domain containing 5 | 2,03 | 1,64 | FAIL |
| PPP2R5A  | Q15172 | protein phosphatase 2 regulatory subunit B'alpha      | 2,03 | 1,88 | FAIL |
| TOP3A    | Q13472 | DNA topoisomerase III alpha                           | 2,03 | 1,46 | FAIL |
| FARSB    | Q9NSD9 | phenylalanyl-tRNA synthetase subunit beta             | 2,03 | 4,66 | FAIL |
| PRMT5    | O14744 | protein arginine methyltransferase 5                  | 2,03 | 2,58 | FAIL |
| IGF2R    | P11717 | insulin like growth factor 2 receptor                 | 2,02 | 2,51 | FAIL |



|          |            |                                                              |      |      |      |
|----------|------------|--------------------------------------------------------------|------|------|------|
|          | A0A024RCR6 |                                                              | 2,02 | 1,64 | FAIL |
| PPA2     | Q9H2U2     | inorganic pyrophosphatase 2                                  | 2,02 | 2,74 | FAIL |
| PEX16    | E9PLS4     | peroxisomal biogenesis factor 16                             | 2,02 | 2,04 | FAIL |
| RECQL4   | O94761     | RecQ like helicase 4                                         | 2,02 | 2,17 | FAIL |
| RPS6     | P62753     | ribosomal protein S6                                         | 2,02 | 2,29 | FAIL |
| ASH2L    | Q9UBL3     | ASH2 like, histone lysine methyltransferase complex subunit  | 2,02 | 3,13 | FAIL |
| NACC1    | Q96RE7     | nucleus accumbens associated 1                               | 2,02 | 1,72 | FAIL |
| TRMT6    | Q9UJA5     | tRNA methyltransferase 6 non-catalytic subunit               | 2,02 | 2,66 | FAIL |
| NDUFB11  | Q9NX14     | NADH:ubiquinone oxidoreductase subunit B11                   | 2,02 | 2,72 | FAIL |
| IPO5     | O00410     | importin 5                                                   | 2,02 | 2,81 | FAIL |
| NOP9     | Q86U38     | NOP9 nucleolar protein                                       | 2,02 | 1,76 | FAIL |
| MARCKSL1 | P49006     | MARCKS like 1                                                | 2,02 | 1,87 | FAIL |
| SEC13    | P55735     | SEC13 homolog, nuclear pore and COPII coat complex component | 2,02 | 1,52 | FAIL |
| NDUFAF1  | Q9Y375     | NADH:ubiquinone oxidoreductase complex assembly factor 1     | 2,02 | 2,22 | FAIL |
| GCC2     | Q8IWJ2     | GRIP and coiled-coil domain containing 2                     | 2,01 | 3,33 | FAIL |
| RPL14    | P50914     | ribosomal protein L14                                        | 2,01 | 1,48 | FAIL |
| EDC4     | Q6P2E9     | enhancer of mRNA decapping 4                                 | 2,01 | 3,79 | FAIL |
| RPL21    | P46778     | ribosomal protein L21                                        | 2,01 | 2,84 | FAIL |
| RREB1    | Q92766     | ras responsive element binding protein 1                     | 2,01 | 1,55 | FAIL |
|          | A0A087WU02 |                                                              | 2,01 | 4,67 | FAIL |
| EIF2B1   | Q14232     | eukaryotic translation initiation factor 2B subunit alpha    | 2,01 | 2,49 | FAIL |
| SF3A3    | Q12874     | splicing factor 3a subunit 3                                 | 2,01 | 1,49 | FAIL |
| OSBPL9   | Q96SU4     | oxysterol binding protein like 9                             | 2,01 | 1,89 | FAIL |
| PARL     | A0A1W2PS40 | presenilin associated rhomboid like                          | 2,01 | 2,09 | FAIL |
| PRRC2A   | P48634     | proline rich coiled-coil 2A                                  | 2,01 | 2,24 | FAIL |
| TUBGCP2  | Q9BSJ2     | tubulin gamma complex component 2                            | 2,00 | 1,91 | FAIL |
| SLC25A12 | O75746     | solute carrier family 25 member 12                           | 2,00 | 3,60 | FAIL |
| IRF2BP2  | Q7Z5L9     | interferon regulatory factor 2 binding protein 2             | 2,00 | 2,69 | FAIL |
| CTNNA1   | P35221     | catenin alpha 1                                              | 2,00 | 4,05 | FAIL |
| FBXO34   | Q9NWN3     | F-box protein 34                                             | 2,00 | 3,01 | FAIL |
| RDH13    | Q8NBN7     | retinol dehydrogenase 13                                     | 2,00 | 1,47 | FAIL |
| BRD1     | O95696     | bromodomain containing 1                                     | 2,00 | 1,33 | FAIL |
| RASA3    | Q14644     | RAS p21 protein activator 3                                  | 2,00 | 2,17 | FAIL |
|          | A0A087WY00 |                                                              | 2,00 | 2,17 | FAIL |
| CEP78    | A0A2R8Y589 | centrosomal protein 78                                       | 2,00 | 3,12 | FAIL |
| AP1G1    | O43747     | adaptor related protein complex 1 subunit gamma 1            | 2,00 | 2,18 | FAIL |
| NIPSNAP1 | Q9BPW8     | nipsnap homolog 1                                            | 2,00 | 2,89 | FAIL |
| AP3M1    | Q9Y2T2     | adaptor related protein complex 3 subunit mu 1               | 1,99 | 2,89 | FAIL |
| SNX8     | Q9Y5X2     | sorting nexin 8                                              | 1,99 | 1,54 | FAIL |
| LRRC40   | Q9H9A6     | leucine rich repeat containing 40                            | 1,99 | 3,10 | FAIL |
| AAAS     | Q9NRG9     | aladin WD repeat nucleoporin                                 | 1,99 | 2,36 | FAIL |
| EXOSC8   | Q96B26     | exosome component 8                                          | 1,99 | 1,50 | FAIL |
| HSPA4L   | O95757     | heat shock protein family A (Hsp70) member 4 like            | 1,99 | 2,01 | FAIL |

|          |            |                                                                     |      |      |      |
|----------|------------|---------------------------------------------------------------------|------|------|------|
| SENP5    | Q96HI0     | SUMO specific peptidase 5                                           | 1,99 | 2,62 | FAIL |
| PIAS1    | O75925     | protein inhibitor of activated STAT 1                               | 1,99 | 3,00 | FAIL |
| SUGP2    | Q8IX01     | SURP and G-patch domain containing 2                                | 1,99 | 2,59 | FAIL |
| CBX4     | O00257     | chromobox 4                                                         | 1,98 | 2,62 | FAIL |
| HINT3    | Q9NQE9     | histidine triad nucleotide binding protein 3                        | 1,98 | 4,92 | FAIL |
| GTF2I    | P78347     | general transcription factor Iii                                    | 1,98 | 2,25 | FAIL |
| LONP1    | K7EKE6     | lon peptidase 1, mitochondrial                                      | 1,98 | 1,59 | FAIL |
| SUPT6H   | Q7KZ85     | SPT6 homolog, histone chaperone and transcription elongation factor | 1,98 | 2,38 | FAIL |
| BPHL     | Q86W56     | biphenyl hydrolase like                                             | 1,98 | 1,94 | FAIL |
| NOC2L    | Q9Y3T9     | NOC2 like nucleolar associated transcriptional repressor            | 1,98 | 3,83 | FAIL |
| MRPS7    | J3QKW2     | mitochondrial ribosomal protein S7                                  | 1,98 | 2,39 | FAIL |
| RPS6KA1  | Q15418     | ribosomal protein S6 kinase A1                                      | 1,98 | 2,33 | FAIL |
| ATAD2    | Q6PL18     | ATPase family AAA domain containing 2                               | 1,98 | 1,79 | FAIL |
| CHEK1    | O14757     | checkpoint kinase 1                                                 | 1,98 | 3,05 | FAIL |
| ERAP2    | Q6P179     | endoplasmic reticulum aminopeptidase 2                              | 1,98 | 1,70 | FAIL |
| RNF25    | Q96BH1     | ring finger protein 25                                              | 1,98 | 3,14 | FAIL |
| METTL16  | Q86W50     | methyltransferase 16, RNA N6-adenosine                              | 1,98 | 1,48 | FAIL |
| RBM4     | Q9BWF3     | RNA binding motif protein 4                                         | 1,98 | 2,56 | FAIL |
| TIMM23   | O14925     | translocase of inner mitochondrial membrane 23                      | 1,98 | 2,12 | FAIL |
| MTX2     | C9JAZ1     | metaxin 2                                                           | 1,98 | 2,29 | FAIL |
| UBL4A    | P11441     | ubiquitin like 4A                                                   | 1,98 | 1,71 | FAIL |
| EIF5A    | I3L397     | eukaryotic translation initiation factor 5A                         | 1,98 | 2,98 | FAIL |
| PLCB1    | A0A087WT80 | phospholipase C beta 1                                              | 1,98 | 2,32 | FAIL |
| ATP1A1   | P05023     | ATPase Na <sup>+</sup> /K <sup>+</sup> transporting subunit alpha 1 | 1,97 | 3,34 | FAIL |
| PRPSAP2  | O60256     | phosphoribosyl pyrophosphate synthetase associated protein 2        | 1,97 | 2,03 | FAIL |
| SLC1A5   | Q15758     | solute carrier family 1 member 5                                    | 1,97 | 2,47 | FAIL |
| DRG1     | Q9Y295     | developmentally regulated GTP binding protein 1                     | 1,97 | 2,73 | FAIL |
| GALE     | Q14376     | UDP-galactose-4-epimerase                                           | 1,97 | 1,60 | FAIL |
| SIPA1    | F6RY50     | signal-induced proliferation-associated 1                           | 1,97 | 2,62 | FAIL |
| PCMT1    | P22061     | protein-L-isoaspartate (D-aspartate) O-methyltransferase            | 1,97 | 4,11 | FAIL |
| ARHGDIB  | P52566     | Rho GDP dissociation inhibitor beta                                 | 1,97 | 2,15 | FAIL |
| ZC3HAV1  | C9J6P4     | zinc finger CCCH-type containing, antiviral 1                       | 1,97 | 2,18 | FAIL |
| PRMT3    | O60678     | protein arginine methyltransferase 3                                | 1,97 | 3,51 | FAIL |
| SUCLA2   | A0A2R8Y6Y7 | succinate-CoA ligase ADP-forming subunit beta                       | 1,96 | 2,33 | FAIL |
| TBCD     | J3KR97     | tubulin folding cofactor D                                          | 1,96 | 2,37 | FAIL |
| MAP2K4   | P45985     | mitogen-activated protein kinase kinase 4                           | 1,96 | 1,94 | FAIL |
| RANGAP1  | P46060     | Ran GTPase activating protein 1                                     | 1,96 | 3,28 | FAIL |
| RNASEH2A | O75792     | ribonuclease H2 subunit A                                           | 1,96 | 2,06 | FAIL |
| FAR1     | Q8WVX9     | fatty acyl-CoA reductase 1                                          | 1,96 | 2,36 | FAIL |
| SSR3     | C9JA28     | signal sequence receptor subunit 3                                  | 1,96 | 2,10 | FAIL |
| LSM12    | K7ELG9     | LSM12 homolog                                                       | 1,96 | 2,36 | FAIL |

|          |            |                                                                                                                            |      |      |      |
|----------|------------|----------------------------------------------------------------------------------------------------------------------------|------|------|------|
| GART     | P22102     | phosphoribosylglycinamide formyltransferase, phosphoribosylglycinamide synthetase, phosphoribosylaminoimidazole synthetase | 1,96 | 3,39 | FAIL |
| ARFGEF2  | Q9Y6D5     | ADP ribosylation factor guanine nucleotide exchange factor 2                                                               | 1,95 | 1,48 | FAIL |
| SMC3     | Q9UQE7     | structural maintenance of chromosomes 3                                                                                    | 1,95 | 2,23 | FAIL |
| CHEK2    | O96017     | checkpoint kinase 2                                                                                                        | 1,95 | 1,86 | FAIL |
| NUSAP1   | Q9BXS6     | nucleolar and spindle associated protein 1                                                                                 | 1,95 | 2,74 | FAIL |
| FMR1     | Q06787     | fragile X messenger ribonucleoprotein 1                                                                                    | 1,95 | 2,67 | FAIL |
| NCALD    | P61601     | neurocalcin delta                                                                                                          | 1,95 | 1,88 | FAIL |
| RFWD3    | Q6PCD5     | ring finger and WD repeat domain 3                                                                                         | 1,95 | 2,54 | FAIL |
| IGF2BP1  | Q9NZI8     | insulin like growth factor 2 mRNA binding protein 1                                                                        | 1,95 | 2,50 | FAIL |
| IKZF2    | Q9UKS7     | IKAROS family zinc finger 2                                                                                                | 1,95 | 1,65 | FAIL |
| MRPS10   | P82664     | mitochondrial ribosomal protein S10                                                                                        | 1,95 | 1,46 | FAIL |
| RAB5B    | P61020     | RAB5B, member RAS oncogene family                                                                                          | 1,95 | 1,31 | FAIL |
| ZC3H15   | Q8WU90     | zinc finger CCCH-type containing 15                                                                                        | 1,95 | 4,55 | FAIL |
| SMARCC1  | Q92922     | SWI/SNF related, matrix associated, actin dependent regulator of chromatin subfamily c member 1                            | 1,95 | 1,66 | FAIL |
| ESYT2    | H7BXI1     | extended synaptotagmin 2                                                                                                   | 1,95 | 3,17 | FAIL |
| VDAC3    | Q9Y277     | voltage dependent anion channel 3                                                                                          | 1,95 | 1,73 | FAIL |
| EXOSC9   | H0Y9L5     | exosome component 9                                                                                                        | 1,94 | 4,31 | FAIL |
| AP2S1    | M0R0N4     | adaptor related protein complex 2 subunit sigma 1                                                                          | 1,94 | 1,85 | FAIL |
| CPSF3    | Q9UKF6     | cleavage and polyadenylation specific factor 3                                                                             | 1,94 | 2,27 | FAIL |
| C17orf75 | Q9HAS0     | chromosome 17 open reading frame 75                                                                                        | 1,94 | 2,43 | FAIL |
| TTI1     | O43156     | TELO2 interacting protein 1                                                                                                | 1,94 | 1,81 | FAIL |
|          | Q5T3I0     |                                                                                                                            | 1,94 | 4,13 | FAIL |
| HNRNPK   | P61978     | heterogeneous nuclear ribonucleoprotein K                                                                                  | 1,94 | 1,60 | FAIL |
| ATP2C1   | P98194     | ATPase secretory pathway Ca2+ transporting 1                                                                               | 1,94 | 1,76 | FAIL |
| FDFT1    | P37268     | farnesyl-diphosphate farnesyltransferase 1                                                                                 | 1,94 | 2,08 | FAIL |
| NPY1R    | P25929     | neuropeptide Y receptor Y1                                                                                                 | 1,94 | 1,91 | FAIL |
| GEMIN5   | Q8TEQ6     | gem nuclear organelle associated protein 5                                                                                 | 1,93 | 2,20 | FAIL |
| VPS13A   | Q96RL7     | vacuolar protein sorting 13 homolog A                                                                                      | 1,93 | 1,98 | FAIL |
| BRX1     | Q8TDN6     | biogenesis of ribosomes BRX1                                                                                               | 1,93 | 4,69 | FAIL |
| ALG11    | Q2TAA5     | ALG11 alpha-1,2-mannosyltransferase                                                                                        | 1,93 | 1,83 | FAIL |
| ATXN2L   | Q8WWM7     | ataxin 2 like                                                                                                              | 1,93 | 1,98 | FAIL |
| EED      | A0A5F9ZI63 | embryonic ectoderm development                                                                                             | 1,93 | 3,11 | FAIL |
| FAM98A   | Q8NCA5     | family with sequence similarity 98 member A                                                                                | 1,93 | 1,42 | FAIL |
| EDEM2    | Q9BV94     | ER degradation enhancing alpha-mannosidase like protein 2                                                                  | 1,93 | 1,55 | FAIL |
| BCAT1    | P54687     | branched chain amino acid transaminase 1                                                                                   | 1,93 | 3,06 | FAIL |
| CLASP2   | E7EW49     | cytoplasmic linker associated protein 2                                                                                    | 1,93 | 2,87 | FAIL |
| SEC16A   | F1T0I1     | SEC16 homolog A, endoplasmic reticulum export factor                                                                       | 1,93 | 3,15 | FAIL |
| ZBTB21   | Q9ULJ3     | zinc finger and BTB domain containing 21                                                                                   | 1,93 | 1,90 | FAIL |
| LETM1    | O95202     | leucine zipper and EF-hand containing transmembrane protein 1                                                              | 1,93 | 1,42 | FAIL |

|          |            |                                                             |      |      |      |
|----------|------------|-------------------------------------------------------------|------|------|------|
| TIMM17B  | V9GYS0     | translocase of inner mitochondrial membrane 17B             | 1,92 | 1,86 | FAIL |
| MRGBP    | Q9NV56     | MRG domain binding protein                                  | 1,92 | 1,60 | FAIL |
| UFD1     | C9J6N9     | ubiquitin recognition factor in ER associated degradation 1 | 1,92 | 2,61 | FAIL |
| CEP68    | Q76N32     | centrosomal protein 68                                      | 1,92 | 2,61 | FAIL |
| USP10    | Q14694     | ubiquitin specific peptidase 10                             | 1,92 | 2,73 | FAIL |
| GMIP     | Q9P107     | GEM interacting protein                                     | 1,92 | 2,88 | FAIL |
| MAGT1    | Q9H0U3     | magnesium transporter 1                                     | 1,92 | 2,99 | FAIL |
| TAP2     | X5CMH5     | transporter 2, ATP binding cassette subfamily B member      | 1,92 | 2,68 | FAIL |
| C11orf58 | O00193     | chromosome 11 open reading frame 58                         | 1,92 | 1,77 | FAIL |
| ERP44    | Q9BS26     | endoplasmic reticulum protein 44                            | 1,92 | 3,11 | FAIL |
| UBAP2L   | Q14157     | ubiquitin associated protein 2 like                         | 1,92 | 1,70 | FAIL |
| HIP1R    | O75146     | huntingtin interacting protein 1 related                    | 1,92 | 2,61 | FAIL |
| TJAP1    | E2QRK7     | tight junction associated protein 1                         | 1,92 | 2,25 | FAIL |
| C11orf54 | E9PIP1     | chromosome 11 open reading frame 54                         | 1,92 | 3,16 | FAIL |
| INPP5K   | Q9BT40     | inositol polyphosphate-5-phosphatase K                      | 1,92 | 1,35 | FAIL |
| SPTLC1   | O15269     | serine palmitoyltransferase long chain base subunit 1       | 1,92 | 2,83 | FAIL |
| AGPAT5   | Q9NUQ2     | 1-acylglycerol-3-phosphate O-acyltransferase 5              | 1,91 | 1,94 | FAIL |
| THUMPD3  | Q9BV44     | THUMP domain containing 3                                   | 1,91 | 4,06 | FAIL |
| IRGQ     | Q8WZA9     | immunity related GTPase Q                                   | 1,91 | 3,00 | FAIL |
| TOR1AIP1 | J3KN66     | torsin 1A interacting protein 1                             | 1,91 | 2,93 | FAIL |
| EHD4     | Q9H223     | EH domain containing 4                                      | 1,91 | 2,28 | FAIL |
| GSK3B    | P49841     | glycogen synthase kinase 3 beta                             | 1,91 | 3,16 | FAIL |
| INTS5    | Q6P9B9     | integrator complex subunit 5                                | 1,91 | 3,83 | FAIL |
| UBE2S    | Q16763     | ubiquitin conjugating enzyme E2 S                           | 1,91 | 1,32 | FAIL |
| ARID2    | Q68CP9     | AT-rich interaction domain 2                                | 1,90 | 4,42 | FAIL |
| ZMYND8   | A0A087WYS3 | zinc finger MYND-type containing 8                          | 1,90 | 1,35 | FAIL |
| MTA1     | E7ESY4     | metastasis associated 1                                     | 1,90 | 2,44 | FAIL |
| MAN1B1   | Q9UKM7     | mannosidase alpha class 1B member 1                         | 1,90 | 2,33 | FAIL |
| SOX12    | O15370     | SRY-box transcription factor 12                             | 1,90 | 1,85 | FAIL |
| NAA10    | P41227     | N-alpha-acetyltransferase 10, NatA catalytic subunit        | 1,90 | 2,32 | FAIL |
| CEP350   | Q5VT06     | centrosomal protein 350                                     | 1,90 | 1,48 | FAIL |
| PSMD10   | B1AJY5     | proteasome 26S subunit, non-ATPase 10                       | 1,90 | 1,67 | FAIL |
| CERS6    | Q6ZMG9     | ceramide synthase 6                                         | 1,90 | 3,91 | FAIL |
| LRP8     | Q14114     | LDL receptor related protein 8                              | 1,90 | 3,35 | FAIL |
| PTPN2    | P17706     | protein tyrosine phosphatase non-receptor type 2            | 1,90 | 2,17 | FAIL |
| VPS26B   | Q4G0F5     | VPS26 retromer complex component B                          | 1,90 | 2,15 | FAIL |
| NOL9     | Q5SY16     | nucleolar protein 9                                         | 1,89 | 3,43 | FAIL |
| SARS2    | M0QWZ7     | seryl-tRNA synthetase 2, mitochondrial                      | 1,89 | 1,92 | FAIL |
| ADH5     | P11766     | alcohol dehydrogenase 5 (class III), chi polypeptide        | 1,89 | 2,02 | FAIL |
| RDH11    | Q8TC12     | retinol dehydrogenase 11                                    | 1,89 | 3,35 | FAIL |
| TAF10    | Q12962     | TATA-box binding protein associated factor 10               | 1,89 | 1,94 | FAIL |
| MINK1    | Q8N4C8     | misshapen like kinase 1                                     | 1,89 | 2,18 | FAIL |
| HARS1    | A0A6Q8PHA5 | histidyl-tRNA synthetase 1                                  | 1,89 | 1,54 | FAIL |
| PDHX     | O00330     | pyruvate dehydrogenase complex component X                  | 1,89 | 3,91 | FAIL |

|          |            |                                                               |      |      |      |
|----------|------------|---------------------------------------------------------------|------|------|------|
| STT3B    | Q8TCJ2     | STT3 oligosaccharyltransferase complex catalytic subunit B    | 1,89 | 4,56 | FAIL |
| UBE2G2   | P60604     | ubiquitin conjugating enzyme E2 G2                            | 1,89 | 2,96 | FAIL |
| ABCC1    | P33527     | ATP binding cassette subfamily C member 1 (ABCC1 blood group) | 1,89 | 2,39 | FAIL |
| PSMA5    | P28066     | proteasome 20S subunit alpha 5                                | 1,89 | 1,37 | FAIL |
| ELOB     | Q15370     | elongin B                                                     | 1,89 | 2,61 | FAIL |
| CTCF     | A0A2R8Y595 | CCCTC-binding factor                                          | 1,89 | 1,85 | FAIL |
| AAK1     | A0A096LP25 | AP2 associated kinase 1                                       | 1,89 | 2,11 | FAIL |
| ASS1     | P00966     | argininosuccinate synthase 1                                  | 1,89 | 2,22 | FAIL |
| STAT1    | P42224     | signal transducer and activator of transcription 1            | 1,89 | 2,05 | FAIL |
| TLR3     | O15455     | toll like receptor 3                                          | 1,89 | 1,64 | FAIL |
| TRUB1    | Q8WWH5     | TruB pseudouridine synthase family member 1                   | 1,89 | 3,02 | FAIL |
|          | A0A087WZ13 |                                                               | 1,89 | 1,65 | FAIL |
| UBXN4    | Q92575     | UBX domain protein 4                                          | 1,89 | 1,34 | FAIL |
| HSP90AB1 | P08238     | heat shock protein 90 alpha family class B member 1           | 1,89 | 2,91 | FAIL |
| CMSS1    | C9J384     | cms1 ribosomal small subunit homolog                          | 1,89 | 2,76 | FAIL |
| TSC2     | A0A2R8YDR3 | TSC complex subunit 2                                         | 1,89 | 3,77 | FAIL |
| MRPL23   | Q16540     | mitochondrial ribosomal protein L23                           | 1,89 | 3,30 | FAIL |
| RAB9A    | P51151     | RAB9A, member RAS oncogene family                             | 1,89 | 1,44 | FAIL |
| DCAF7    | P61962     | DDB1 and CUL4 associated factor 7                             | 1,89 | 3,98 | FAIL |
| VPS4A    | Q9UN37     | vacuolar protein sorting 4 homolog A                          | 1,89 | 2,78 | FAIL |
| EEF1E1   | O43324     | eukaryotic translation elongation factor 1 epsilon 1          | 1,89 | 1,91 | FAIL |
| CNOT3    | O75175     | CCR4-NOT transcription complex subunit 3                      | 1,89 | 1,89 | FAIL |
| CSE1L    | P55060     | chromosome segregation 1 like                                 | 1,88 | 1,75 | FAIL |
| COTL1    | Q14019     | coactosin like F-actin binding protein 1                      | 1,88 | 2,99 | FAIL |
| SGO1     | Q5FBB7     | shugoshin 1                                                   | 1,88 | 3,72 | FAIL |
| RBM26    | Q5T8P6     | RNA binding motif protein 26                                  | 1,88 | 3,49 | FAIL |
| NDUFB10  | O96000     | NADH:ubiquinone oxidoreductase subunit B10                    | 1,88 | 2,42 | FAIL |
| RCC2     | Q9P258     | regulator of chromosome condensation 2                        | 1,88 | 2,47 | FAIL |
| CCDC120  | Q96HB5     | coiled-coil domain containing 120                             | 1,88 | 1,96 | FAIL |
| TAF1     | P21675     | TATA-box binding protein associated factor 1                  | 1,88 | 1,63 | FAIL |
| HOMER3   | Q9NSC5     | homer scaffold protein 3                                      | 1,88 | 1,61 | FAIL |
| PGM3     | A0A494C0G1 | phosphoglucomutase 3                                          | 1,88 | 1,41 | FAIL |
| BCAP31   | C9JSP1     | B cell receptor associated protein 31                         | 1,88 | 2,80 | FAIL |
| NUFIP2   | Q7Z417     | nuclear FMR1 interacting protein 2                            | 1,88 | 3,05 | FAIL |
| XYLT1    | Q86Y38     | xylosyltransferase 1                                          | 1,88 | 1,95 | FAIL |
| SMAD2    | Q15796     | SMAD family member 2                                          | 1,88 | 1,82 | FAIL |
| TRIM26   | Q12899     | tripartite motif containing 26                                | 1,88 | 2,28 | FAIL |
|          | A0A0J9YYD9 |                                                               | 1,88 | 1,71 | FAIL |
| SMC5     | Q8IY18     | structural maintenance of chromosomes 5                       | 1,88 | 2,22 | FAIL |
| ELF1     | A0A0U1RR15 | E74 like ETS transcription factor 1                           | 1,87 | 2,65 | FAIL |
| IPO13    | O94829     | importin 13                                                   | 1,87 | 2,30 | FAIL |
| KPNA1    | P52294     | karyopherin subunit alpha 1                                   | 1,87 | 2,62 | FAIL |
| SCAMP2   | O15127     | secretory carrier membrane protein 2                          | 1,87 | 1,85 | FAIL |
| PCK2     | Q16822     | phosphoenolpyruvate carboxykinase 2, mitochondrial            | 1,87 | 1,68 | FAIL |

|            |            |                                                                     |      |      |      |
|------------|------------|---------------------------------------------------------------------|------|------|------|
| RAB35      | Q15286     | RAB35, member RAS oncogene family                                   | 1,87 | 4,01 | FAIL |
| SACM1L     | A0A5F9ZHN7 | SAC1 like phosphatidylinositide phosphatase                         | 1,87 | 2,59 | FAIL |
|            | A0A087WY61 |                                                                     | 1,87 | 3,44 | FAIL |
| KDM6A      | O15550     | lysine demethylase 6A                                               | 1,87 | 2,79 | FAIL |
| PRKAG1     | P54619     | protein kinase AMP-activated non-catalytic subunit<br>gamma 1       | 1,87 | 2,77 | FAIL |
| NIFK       | Q9BYG3     | nucleolar protein interacting with the FHA domain of<br>MKI67       | 1,87 | 2,88 | FAIL |
| HDAC2      | Q92769     | histone deacetylase 2                                               | 1,87 | 1,68 | FAIL |
| MYL6       | B7Z6Z4     | myosin light chain 6                                                | 1,87 | 2,89 | FAIL |
| TCF12      | Q99081     | transcription factor 12                                             | 1,87 | 2,04 | FAIL |
| PROX1      | Q92786     | prospero homeobox 1                                                 | 1,87 | 2,04 | FAIL |
| LDAF1      | Q96B96     | lipid droplet assembly factor 1                                     | 1,87 | 3,65 | FAIL |
| EP300      | Q09472     | E1A binding protein p300                                            | 1,87 | 2,84 | FAIL |
| DGKZ       | Q13574     | diacylglycerol kinase zeta                                          | 1,87 | 4,09 | FAIL |
| ABCF3      | Q9NUQ8     | ATP binding cassette subfamily F member 3                           | 1,86 | 1,49 | FAIL |
| RPS6KB2    | Q9UBS0     | ribosomal protein S6 kinase B2                                      | 1,86 | 4,24 | FAIL |
| RPS12      | P25398     | ribosomal protein S12                                               | 1,86 | 3,99 | FAIL |
| OLA1       | Q9NTK5     | Obg like ATPase 1                                                   | 1,86 | 2,32 | FAIL |
| MIOS       | Q9NXC5     | meiosis regulator for oocyte development                            | 1,86 | 2,33 | FAIL |
| MED8       | Q96G25     | mediator complex subunit 8                                          | 1,86 | 1,48 | FAIL |
| HSP90AA1   | P07900     | heat shock protein 90 alpha family class A member 1                 | 1,86 | 3,81 | FAIL |
| LARS2      | Q15031     | leucyl-tRNA synthetase 2, mitochondrial                             | 1,86 | 2,50 | FAIL |
| EXD2       | Q9NVH0     | exonuclease 3'-5' domain containing 2                               | 1,86 | 1,51 | FAIL |
| MASTL      | Q96GX5     | microtubule associated serine/threonine kinase like                 | 1,85 | 2,51 | FAIL |
| PPP2R5E    | Q16537     | protein phosphatase 2 regulatory subunit B'epsilon                  | 1,85 | 1,47 | FAIL |
| SYNJ1      | O43426     | synaptojanin 1                                                      | 1,85 | 2,42 | FAIL |
| PSMC2      | P35998     | proteasome 26S subunit, ATPase 2                                    | 1,85 | 2,49 | FAIL |
| IQGAP2     | Q13576     | IQ motif containing GTPase activating protein 2                     | 1,85 | 3,12 | FAIL |
| SNX25      | Q9H3E2     | sorting nexin 25                                                    | 1,85 | 1,55 | FAIL |
| PANK4      | E9PHT6     | pantothenate kinase 4 (inactive)                                    | 1,85 | 3,35 | FAIL |
| BIVM-ERCC5 | R4GMW8     | BIVM-ERCC5 readthrough                                              | 1,85 | 1,56 | FAIL |
| EIF2A      | Q9BY44     | eukaryotic translation initiation factor 2A                         | 1,85 | 2,72 | FAIL |
| LRRC47     | Q8N1G4     | leucine rich repeat containing 47                                   | 1,85 | 3,25 | FAIL |
| TRPC3      | J3QTB0     | transient receptor potential cation channel subfamily C<br>member 3 | 1,85 | 1,72 | FAIL |
| SKP2       | A0A0A0MTL5 | S-phase kinase associated protein 2                                 | 1,85 | 3,45 | FAIL |
| RCOR1      | Q9UKL0     | REST corepressor 1                                                  | 1,85 | 1,65 | FAIL |
| TFB2M      | Q9H5Q4     | transcription factor B2, mitochondrial                              | 1,85 | 1,92 | FAIL |
| RPGR       | A0A2R8YFT6 | retinitis pigmentosa GTPase regulator                               | 1,85 | 1,37 | FAIL |
| CCT7       | Q99832     | chaperonin containing TCP1 subunit 7                                | 1,85 | 1,86 | FAIL |
| PML        | P29590     | PML nuclear body scaffold                                           | 1,85 | 4,58 | FAIL |
| AP2A1      | O95782     | adaptor related protein complex 2 subunit alpha 1                   | 1,85 | 3,68 | FAIL |
| MICU2      | Q8IYU8     | mitochondrial calcium uptake 2                                      | 1,85 | 2,12 | FAIL |
|            | M0QZD8     |                                                                     | 1,84 | 3,50 | FAIL |
| DYNLL1     | P63167     | dynein light chain LC8-type 1                                       | 1,84 | 4,82 | FAIL |
| TM7SF2     | H0YEN6     | transmembrane 7 superfamily member 2                                | 1,84 | 1,78 | FAIL |

|          |            |                                                        |      |      |      |
|----------|------------|--------------------------------------------------------|------|------|------|
| VPS29    | F8VXU5     | VPS29 retromer complex component                       | 1,84 | 2,63 | FAIL |
| RPTOR    | Q8N122     | regulatory associated protein of MTOR complex 1        | 1,84 | 2,76 | FAIL |
| AHCY     | P23526     | adenosylhomocysteinase                                 | 1,84 | 4,00 | FAIL |
| TM9SF3   | Q9HD45     | transmembrane 9 superfamily member 3                   | 1,84 | 3,01 | FAIL |
| NUDCD2   | Q8WVJ2     | NudC domain containing 2                               | 1,84 | 3,54 | FAIL |
| G3BP2    | Q9UN86     | G3BP stress granule assembly factor 2                  | 1,84 | 1,93 | FAIL |
| CPNE3    | O75131     | copine 3                                               | 1,84 | 1,98 | FAIL |
| PSAT1    | Q9Y617     | phosphoserine aminotransferase 1                       | 1,84 | 2,11 | FAIL |
| SMPD4    | Q9NXE4     | sphingomyelin phosphodiesterase 4                      | 1,84 | 2,65 | FAIL |
| CEP250   | Q9BV73     | centrosomal protein 250                                | 1,84 | 2,01 | FAIL |
| TUBB3    | Q13509     | tubulin beta 3 class III                               | 1,84 | 1,95 | FAIL |
| SRPK1    | Q96SB4     | SRSF protein kinase 1                                  | 1,83 | 3,82 | FAIL |
| CLPTMIL  | Q96KA5     | CLPTM1 like                                            | 1,83 | 1,61 | FAIL |
| VAV1     | F5H5P4     | vav guanine nucleotide exchange factor 1               | 1,83 | 3,07 | FAIL |
| COX15    | Q7KZN9     | cytochrome c oxidase assembly homolog COX15            | 1,83 | 1,97 | FAIL |
| UMPS     | P11172     | uridine monophosphate synthetase                       | 1,83 | 1,42 | FAIL |
| CTNBL1   | Q8WYA6     | catenin beta like 1                                    | 1,83 | 3,37 | FAIL |
| GTF2B    | Q00403     | general transcription factor IIB                       | 1,83 | 1,46 | FAIL |
| LMO7     | E9PMT2     | LIM domain 7                                           | 1,83 | 1,42 | FAIL |
| ARHGEF1  | M0QZR4     | Rho guanine nucleotide exchange factor 1               | 1,83 | 1,94 | FAIL |
| MAPK1    | P28482     | mitogen-activated protein kinase 1                     | 1,83 | 3,36 | FAIL |
| TRIR     | Q9BQ61     | telomerase RNA component interacting RNase             | 1,83 | 1,69 | FAIL |
| VPS50    | Q96JG6     | VPS50 subunit of EARP/GARPII complex                   | 1,83 | 1,66 | FAIL |
| ATP1B3   | P54709     | ATPase Na+/K+ transporting subunit beta 3              | 1,83 | 2,13 | FAIL |
| PI4K2A   | Q9BTU6     | phosphatidylinositol 4-kinase type 2 alpha             | 1,83 | 1,92 | FAIL |
| MPO      | P05164     | myeloperoxidase                                        | 1,83 | 1,67 | FAIL |
| TRAPPC8  | J3KSL8     | trafficking protein particle complex subunit 8         | 1,83 | 2,38 | FAIL |
| MAGEA4   | P43358     | MAGE family member A4                                  | 1,83 | 1,96 | FAIL |
| CORO1A   | P31146     | coronin 1A                                             | 1,83 | 2,12 | FAIL |
| MSL3     | A0A3B3IT59 | MSL complex subunit 3                                  | 1,82 | 2,82 | FAIL |
| GPS2     | I3L3Y9     | G protein pathway suppressor 2                         | 1,82 | 3,55 | FAIL |
| CDK6     | Q00534     | cyclin dependent kinase 6                              | 1,82 | 2,23 | FAIL |
| CLCN7    | P51798     | chloride voltage-gated channel 7                       | 1,82 | 2,69 | FAIL |
| FOXRED1  | Q96CU9     | FAD dependent oxidoreductase domain containing 1       | 1,82 | 2,69 | FAIL |
| FAM167B  | Q9BTA0     | family with sequence similarity 167 member B           | 1,82 | 3,46 | FAIL |
| RRP15    | Q9Y3B9     | ribosomal RNA processing 15 homolog                    | 1,82 | 1,40 | FAIL |
| PRKCQ    | Q04759     | protein kinase C theta                                 | 1,82 | 2,24 | FAIL |
| PTGES3   | A0A087WYT3 | prostaglandin E synthase 3                             | 1,82 | 1,95 | FAIL |
| UBE2N    | F8VZ29     | ubiquitin conjugating enzyme E2 N                      | 1,82 | 2,08 | FAIL |
| INPP5F   | A0A3B3ISI3 | inositol polyphosphate-5-phosphatase F                 | 1,82 | 1,39 | FAIL |
| NDUFB4   | O95168     | NADH:ubiquinone oxidoreductase subunit B4              | 1,82 | 1,96 | FAIL |
| RAB43    | Q86YS6     | RAB43, member RAS oncogene family                      | 1,82 | 3,13 | FAIL |
| STK26    | Q8NBY1     | serine/threonine kinase 26                             | 1,82 | 2,68 | FAIL |
| COG6     | Q9Y2V7     | component of oligomeric golgi complex 6                | 1,82 | 3,02 | FAIL |
| TUBB3    | G3V542     | tubulin beta 3 class III                               | 1,82 | 1,89 | FAIL |
|          | A0A0U1RRH6 |                                                        | 1,82 | 4,03 | FAIL |
| SLC25A25 | Q6KCM7     | solute carrier family 25 member 25                     | 1,82 | 1,69 | FAIL |
| PIP5K1A  | A6PW57     | phosphatidylinositol-4-phosphate 5-kinase type 1 alpha | 1,82 | 3,61 | FAIL |

|          |            |                                                                                                |      |      |      |
|----------|------------|------------------------------------------------------------------------------------------------|------|------|------|
| MARK3    | J3KNR0     | microtubule affinity regulating kinase 3                                                       | 1,82 | 2,86 | FAIL |
| ARMC9    | A0A2Q3DP09 | armadillo repeat containing 9                                                                  | 1,82 | 3,21 | FAIL |
| GSK3A    | P49840     | glycogen synthase kinase 3 alpha                                                               | 1,82 | 3,54 | FAIL |
| LMBRD2   | Q68DH5     | LMBR1 domain containing 2                                                                      | 1,82 | 2,60 | FAIL |
| HPS6     | Q86YV9     | HPS6 biogenesis of lysosomal organelles complex 2 subunit 3                                    | 1,81 | 2,22 | FAIL |
| CSNK1D   | H7BYT1     | casein kinase 1 delta                                                                          | 1,81 | 4,21 | FAIL |
| SEC61B   | P60468     | SEC61 translocon subunit beta                                                                  | 1,81 | 2,87 | FAIL |
| MED1     | Q15648     | mediator complex subunit 1                                                                     | 1,81 | 2,91 | FAIL |
| POC5     | Q8NA72     | POC5 centriolar protein                                                                        | 1,81 | 2,74 | FAIL |
| PRAME    | P78395     | PRAME nuclear receptor transcriptional regulator                                               | 1,81 | 1,30 | FAIL |
| DNAJC11  | Q9NVH1     | DnaJ heat shock protein family (Hsp40) member C11                                              | 1,81 | 1,78 | FAIL |
| RPS21    | P63220     | ribosomal protein S21                                                                          | 1,81 | 1,34 | FAIL |
| USP3     | Q9Y6I4     | ubiquitin specific peptidase 3                                                                 | 1,81 | 2,99 | FAIL |
| ABL1     | P00519     | ABL proto-oncogene 1, non-receptor tyrosine kinase                                             | 1,81 | 2,11 | FAIL |
| CUL3     | Q13618     | cullin 3                                                                                       | 1,81 | 2,18 | FAIL |
| MAPK9    | P45984     | mitogen-activated protein kinase 9                                                             | 1,81 | 2,73 | FAIL |
| UTP14A   | Q9BVJ6     | UTP14A small subunit processome component                                                      | 1,81 | 1,34 | FAIL |
| SMARCAL1 | Q9NZC9     | SWI/SNF related, matrix associated, actin dependent regulator of chromatin, subfamily a like 1 | 1,81 | 1,39 | FAIL |
| CSNK1A1  | U3KPX3     | casein kinase 1 alpha 1                                                                        | 1,81 | 2,91 | FAIL |
| KIF5B    | P33176     | kinesin family member 5B                                                                       | 1,81 | 2,58 | FAIL |
| KLC1     | G3V3H3     | kinesin light chain 1                                                                          | 1,81 | 3,80 | FAIL |
| CUX1     | P39880     | cut like homeobox 1                                                                            | 1,81 | 1,41 | FAIL |
| NVL      | O15381     | nuclear VCP like                                                                               | 1,81 | 2,47 | FAIL |
| SH2D3C   | Q8N5H7     | SH2 domain containing 3C                                                                       | 1,80 | 3,40 | FAIL |
| RIF1     | Q5UIP0     | replication timing regulatory factor 1                                                         | 1,80 | 1,76 | FAIL |
| AUP1     | Q9Y679     | AUP1 lipid droplet regulating VLDL assembly factor                                             | 1,80 | 2,03 | FAIL |
| LCMT2    | O60294     | leucine carboxyl methyltransferase 2                                                           | 1,80 | 2,79 | FAIL |
| TOP2B    | Q02880     | DNA topoisomerase II beta                                                                      | 1,80 | 3,71 | FAIL |
| CERT1    | A0A2R8YEK8 | ceramide transporter 1                                                                         | 1,80 | 1,76 | FAIL |
| MYO1B    | E9PDF6     | myosin IB                                                                                      | 1,80 | 1,87 | FAIL |
| CLPX     | O76031     | caseinolytic mitochondrial matrix peptidase chaperone subunit X                                | 1,80 | 2,77 | FAIL |
| DTYMK    | P23919     | deoxythymidylate kinase                                                                        | 1,80 | 2,06 | FAIL |
| UBR4     | Q5T4S7     | ubiquitin protein ligase E3 component n-recognin 4                                             | 1,80 | 4,46 | FAIL |
|          | A0A0A0MS59 |                                                                                                | 1,80 | 1,86 | FAIL |
| KDM1A    | O60341     | lysine demethylase 1A                                                                          | 1,80 | 1,40 | FAIL |
| OPTC     | Q9UBM4     | opticin                                                                                        | 1,80 | 1,65 | FAIL |
| EIF4G1   | E7EUU4     | eukaryotic translation initiation factor 4 gamma 1                                             | 1,80 | 2,39 | FAIL |
|          | A0A0A0MS54 |                                                                                                | 1,80 | 1,70 | FAIL |
| TBC1D5   | Q92609     | TBC1 domain family member 5                                                                    | 1,80 | 2,56 | FAIL |
| ARF5     | P84085     | ADP ribosylation factor 5                                                                      | 1,80 | 1,75 | FAIL |
| PHB1     | P35232     | prohibitin 1                                                                                   | 1,80 | 3,54 | FAIL |
|          | A2BF26     |                                                                                                | 1,79 | 2,56 | FAIL |
| ELOC     | Q15369     | elongin C                                                                                      | 1,79 | 4,09 | FAIL |



|         |            |                                                                         |      |      |      |
|---------|------------|-------------------------------------------------------------------------|------|------|------|
| PKD1    | Q15118     | pyruvate dehydrogenase kinase 1                                         | 1,79 | 3,15 | FAIL |
| LIG1    | P18858     | DNA ligase 1                                                            | 1,79 | 2,59 | FAIL |
| XPO5    | Q9HAV4     | exportin 5                                                              | 1,79 | 2,55 | FAIL |
| CLPB    | Q9H078     | ClpB family mitochondrial disaggregase                                  | 1,79 | 2,09 | FAIL |
| ANAPC5  | Q9UJX4     | anaphase promoting complex subunit 5                                    | 1,79 | 3,08 | FAIL |
| NFXL1   | Q6ZNB6     | nuclear transcription factor, X-box binding like 1                      | 1,79 | 2,46 | FAIL |
| RAB21   | Q9UL25     | RAB21, member RAS oncogene family                                       | 1,79 | 1,72 | FAIL |
| KIRREL1 | Q96J84     | kirre like nephrin family adhesion molecule 1                           | 1,79 | 2,61 | FAIL |
|         | P51784     |                                                                         | 1,79 | 2,60 | FAIL |
| CHMP7   | Q8WUX9     | charged multivesicular body protein 7                                   | 1,79 | 1,77 | FAIL |
| ACSF3   | Q4G176     | acyl-CoA synthetase family member 3                                     | 1,79 | 3,50 | FAIL |
| RAB33B  | A0A494C0Z5 | RAB33B, member RAS oncogene family                                      | 1,78 | 2,13 | FAIL |
| LCLAT1  | Q6UWP7     | lysocardiolipin acyltransferase 1                                       | 1,78 | 1,75 | FAIL |
| SND1    | Q7KZF4     | staphylococcal nuclease and tudor domain containing 1                   | 1,78 | 3,02 | FAIL |
| LIG4    | A0A0C4DGV9 | DNA ligase 4                                                            | 1,78 | 2,13 | FAIL |
| TAP1    | Q03518     | transporter 1, ATP binding cassette subfamily B member                  | 1,78 | 2,50 | FAIL |
| AIMP1   | Q12904     | aminoacyl tRNA synthetase complex interacting multifunctional protein 1 | 1,78 | 1,58 | FAIL |
| SCAMP1  | A0A087WXB0 | secretory carrier membrane protein 1                                    | 1,78 | 1,92 | FAIL |
| ST13    | P50502     | ST13 Hsp70 interacting protein                                          | 1,78 | 3,21 | FAIL |
| MIA3    | Q5JRA6     | MIA SH3 domain ER export factor 3                                       | 1,78 | 1,39 | FAIL |
| MED23   | Q9ULK4     | mediator complex subunit 23                                             | 1,78 | 3,37 | FAIL |
| EIF2S3  | P41091     | eukaryotic translation initiation factor 2 subunit gamma                | 1,78 | 2,40 | FAIL |
| MAP2K6  | P52564     | mitogen-activated protein kinase kinase 6                               | 1,77 | 2,85 | FAIL |
| MICOS13 | A0A140TA86 | mitochondrial contact site and cristae organizing system subunit 13     | 1,77 | 1,67 | FAIL |
|         | F6S7C4     |                                                                         | 1,77 | 3,66 | FAIL |
| ZNF22   | P17026     | zinc finger protein 22                                                  | 1,77 | 1,64 | FAIL |
| USP7    | Q93009     | ubiquitin specific peptidase 7                                          | 1,77 | 3,67 | FAIL |
| VAV3    | Q9UKW4     | vav guanine nucleotide exchange factor 3                                | 1,77 | 3,11 | FAIL |
| TUT4    | A0A0C4DFM7 | terminal uridylyl transferase 4                                         | 1,77 | 3,16 | FAIL |
| KDM4B   | O94953     | lysine demethylase 4B                                                   | 1,77 | 2,04 | FAIL |
| NHERF1  | O14745     | NHERF family PDZ scaffold protein 1                                     | 1,77 | 2,95 | FAIL |
| EDC3    | Q96F86     | enhancer of mRNA decapping 3                                            | 1,77 | 2,64 | FAIL |
| SPCS1   | A0A5F9YFS9 | signal peptidase complex subunit 1                                      | 1,77 | 2,20 | FAIL |
| PRKAA1  | Q13131     | protein kinase AMP-activated catalytic subunit alpha 1                  | 1,77 | 3,32 | FAIL |
|         | A8MPP1     |                                                                         | 1,77 | 2,28 | FAIL |
| STAT6   | A0A1W2PNW1 | signal transducer and activator of transcription 6                      | 1,77 | 2,69 | FAIL |
| RNF123  | Q5XPI4     | ring finger protein 123                                                 | 1,77 | 3,19 | FAIL |
| EIF4E   | D6RBW1     | eukaryotic translation initiation factor 4E                             | 1,77 | 2,25 | FAIL |
| HACD3   | Q9P035     | 3-hydroxyacyl-CoA dehydratase 3                                         | 1,77 | 1,69 | FAIL |
| TBL1XR1 | Q9BZK7     | TBL1X/Y related 1                                                       | 1,77 | 3,45 | FAIL |
| SLC33A1 | O00400     | solute carrier family 33 member 1                                       | 1,76 | 2,66 | FAIL |
| MRPL41  | Q8IXM3     | mitochondrial ribosomal protein L41                                     | 1,76 | 4,00 | FAIL |
| POLR2C  | P19387     | RNA polymerase II subunit C                                             | 1,76 | 3,42 | FAIL |
| SLFN11  | Q7Z7L1     | schlafen family member 11                                               | 1,76 | 1,59 | FAIL |

|          |            |                                                                                                   |      |      |      |
|----------|------------|---------------------------------------------------------------------------------------------------|------|------|------|
| C2CD5    | Q86YS7     | C2 calcium dependent domain containing 5                                                          | 1,76 | 1,67 | FAIL |
| SDHB     | P21912     | succinate dehydrogenase complex iron sulfur subunit B                                             | 1,76 | 1,61 | FAIL |
| TMEM126B | H0YD74     | transmembrane protein 126B                                                                        | 1,76 | 2,06 | FAIL |
| SMARCB1  | G5E975     | SWI/SNF related, matrix associated, actin dependent regulator of chromatin, subfamily b, member 1 | 1,76 | 1,88 | FAIL |
| ARMC1    | Q9NVT9     | armadillo repeat containing 1                                                                     | 1,76 | 1,69 | FAIL |
| SPTY2D1  | Q68D10     | SPT2 chromatin protein domain containing 1                                                        | 1,76 | 3,11 | FAIL |
| MBD4     | O95243     | methyl-CpG binding domain 4, DNA glycosylase                                                      | 1,76 | 2,74 | FAIL |
| MRPS14   | O60783     | mitochondrial ribosomal protein S14                                                               | 1,76 | 1,64 | FAIL |
| RFT1     | B5MDE0     | RFT1 homolog                                                                                      | 1,75 | 2,68 | FAIL |
| SEC24A   | O95486     | SEC24 homolog A, COPII coat complex component                                                     | 1,75 | 3,55 | FAIL |
| RBM34    | H7C5M1     | RNA binding motif protein 34                                                                      | 1,75 | 1,69 | FAIL |
| TRIP13   | Q15645     | thyroid hormone receptor interactor 13                                                            | 1,75 | 2,09 | FAIL |
| DHX15    | O43143     | DEAH-box helicase 15                                                                              | 1,75 | 2,79 | FAIL |
| SLC2A1   | P11166     | solute carrier family 2 member 1                                                                  | 1,75 | 3,22 | FAIL |
| TNPO3    | Q9Y5L0     | transportin 3                                                                                     | 1,75 | 2,24 | FAIL |
| PTDSS2   | Q9BVG9     | phosphatidylserine synthase 2                                                                     | 1,75 | 1,72 | FAIL |
| ATP8     | P03928     | ATP synthase F0 subunit 8                                                                         | 1,75 | 4,07 | FAIL |
| ECH1     | Q13011     | enoyl-CoA hydratase 1                                                                             | 1,75 | 1,34 | FAIL |
| CDKAL1   | Q5VV42     | CDK5 regulatory subunit associated protein 1 like 1                                               | 1,75 | 2,70 | FAIL |
| HNRNP2   | P55795     | heterogeneous nuclear ribonucleoprotein H2                                                        | 1,75 | 1,41 | FAIL |
| NELFA    | A0A0C4DFX9 | negative elongation factor complex member A                                                       | 1,74 | 2,42 | FAIL |
| RTN3     | O95197     | reticulin 3                                                                                       | 1,74 | 3,11 | FAIL |
| MTDH     | Q86UE4     | metadherin                                                                                        | 1,74 | 1,81 | FAIL |
| ZNF326   | Q5BKZ1     | zinc finger protein 326                                                                           | 1,74 | 2,31 | FAIL |
| MGMT     | B4DEE8     | O-6-methylguanine-DNA methyltransferase                                                           | 1,74 | 2,77 | FAIL |
| FMNL1    | O95466     | formin like 1                                                                                     | 1,74 | 4,37 | FAIL |
| METAP1   | P53582     | methionyl aminopeptidase 1                                                                        | 1,74 | 2,09 | FAIL |
| CCDC25   | Q86WR0     | coiled-coil domain containing 25                                                                  | 1,74 | 2,66 | FAIL |
| RAP1B    | P61224     | RAP1B, member of RAS oncogene family                                                              | 1,74 | 1,94 | FAIL |
| CDK9     | P50750     | cyclin dependent kinase 9                                                                         | 1,74 | 2,63 | FAIL |
| GANAB    | Q14697     | glucosidase II alpha subunit                                                                      | 1,74 | 1,96 | FAIL |
| CCAR1    | Q8IX12     | cell division cycle and apoptosis regulator 1                                                     | 1,74 | 1,45 | FAIL |
| SLC27A4  | Q6P1M0     | solute carrier family 27 member 4                                                                 | 1,73 | 3,00 | FAIL |
| PMPCB    | O75439     | peptidase, mitochondrial processing subunit beta                                                  | 1,73 | 2,54 | FAIL |
| CD3E     | E9PSH8     | CD3 epsilon subunit of T-cell receptor complex                                                    | 1,73 | 1,93 | FAIL |
| NEU3     | Q9UQ49     | neuraminidase 3                                                                                   | 1,73 | 3,05 | FAIL |
| COPB1    | P53618     | COPI coat complex subunit beta 1                                                                  | 1,73 | 3,23 | FAIL |
| RCE1     | Q9Y256     | Ras converting CAAX endopeptidase 1                                                               | 1,73 | 1,82 | FAIL |
| UBE2D3   | P61077     | ubiquitin conjugating enzyme E2 D3                                                                | 1,73 | 4,16 | FAIL |
| MEAF6    | Q9HAF1     | MYST/Esa1 associated factor 6                                                                     | 1,73 | 2,80 | FAIL |
| GATAD2B  | Q8WXI9     | GATA zinc finger domain containing 2B                                                             | 1,73 | 3,20 | FAIL |
| LPCAT1   | Q8NF37     | lysophosphatidylcholine acyltransferase 1                                                         | 1,73 | 2,18 | FAIL |
| TUBA1B   | P68363     | tubulin alpha 1b                                                                                  | 1,73 | 2,09 | FAIL |
| PMS2     | P54278     | PMS1 homolog 2, mismatch repair system component                                                  | 1,73 | 1,42 | FAIL |
| ODAD3    | A5D8V7     | outer dynein arm docking complex subunit 3                                                        | 1,72 | 2,33 | FAIL |
| ITPA     | Q9BY32     | inosine triphosphatase                                                                            | 1,72 | 1,48 | FAIL |

|             |            |                                                                     |      |      |      |
|-------------|------------|---------------------------------------------------------------------|------|------|------|
| SMG1        | Q96Q15     | SMG1 nonsense mediated mRNA decay associated<br>PI3K related kinase | 1,72 | 2,39 | FAIL |
| INTS4       | Q96HW7     | integrator complex subunit 4                                        | 1,72 | 1,83 | FAIL |
| GIMAP1      | Q8WWP7     | GTPase, IMAP family member 1                                        | 1,72 | 2,06 | FAIL |
| BST2        | Q10589     | bone marrow stromal cell antigen 2                                  | 1,72 | 2,73 | FAIL |
| VDAC2       | P45880     | voltage dependent anion channel 2                                   | 1,72 | 2,24 | FAIL |
| UNC45A      | A0A1W2PNX8 | unc-45 myosin chaperone A                                           | 1,72 | 2,94 | FAIL |
| PSMD12      | O00232     | proteasome 26S subunit, non-ATPase 12                               | 1,72 | 1,84 | FAIL |
| HVCN1       | Q96D96     | hydrogen voltage gated channel 1                                    | 1,72 | 1,37 | FAIL |
| COMMD3-BMI1 | R4GMX3     | COMMD3-BMI1 readthrough                                             | 1,72 | 2,03 | FAIL |
| RPS24       | A0A2R8Y849 | ribosomal protein S24                                               | 1,71 | 1,82 | FAIL |
| RB1         | P06400     | RB transcriptional corepressor 1                                    | 1,71 | 2,71 | FAIL |
| SRP54       | P61011     | signal recognition particle 54                                      | 1,71 | 1,96 | FAIL |
| TCF3        | P15923     | transcription factor 3                                              | 1,71 | 1,39 | FAIL |
| CUL2        | Q13617     | cullin 2                                                            | 1,71 | 2,13 | FAIL |
| GTF3C1      | Q12789     | general transcription factor IIIC subunit 1                         | 1,71 | 1,46 | FAIL |
| PGLS        | O95336     | 6-phosphogluconolactonase                                           | 1,71 | 2,43 | FAIL |
| EARS2       | Q5JPH6     | glutamyl-tRNA synthetase 2, mitochondrial                           | 1,71 | 1,86 | FAIL |
| TAF12       | Q16514     | TATA-box binding protein associated factor 12                       | 1,71 | 2,20 | FAIL |
| PRPF3       | O43395     | pre-mRNA processing factor 3                                        | 1,71 | 1,90 | FAIL |
| YTHDF1      | Q9BYJ9     | YTH N6-methyladenosine RNA binding protein F1                       | 1,70 | 1,94 | FAIL |
| NUDC        | Q9Y266     | nuclear distribution C, dynein complex regulator                    | 1,70 | 4,30 | FAIL |
| HMCES       | E7EMP6     | 5-hydroxymethylcytosine binding, ES cell specific                   | 1,70 | 3,75 | FAIL |
| DYNLRB2     | Q8TF09     | dynein light chain roadblock-type 2                                 | 1,70 | 1,73 | FAIL |
| HM13        | A0A3B3IUB5 | histocompatibility minor 13                                         | 1,70 | 2,42 | FAIL |
| DIDO1       | Q9BTC0     | death inducer-obliterator 1                                         | 1,70 | 1,66 | FAIL |
| LAMA3       | A0A0A0MSA0 | laminin subunit alpha 3                                             | 1,70 | 2,69 | FAIL |
| TMEM97      | Q5BJF2     | transmembrane protein 97                                            | 1,70 | 2,79 | FAIL |
| KIF2C       | Q99661     | kinesin family member 2C                                            | 1,70 | 2,02 | FAIL |
| ZMYM2       | Q9UBW7     | zinc finger MYM-type containing 2                                   | 1,70 | 4,21 | FAIL |
| MTCH2       | Q9Y6C9     | mitochondrial carrier 2                                             | 1,70 | 2,02 | FAIL |
| HSPA9       | P38646     | heat shock protein family A (Hsp70) member 9                        | 1,70 | 3,25 | FAIL |
| DLGAP4      | Q9Y2H0     | DLG associated protein 4                                            | 1,70 | 4,09 | FAIL |
| RIC8A       | Q9NPQ8     | RIC8 guanine nucleotide exchange factor A                           | 1,70 | 2,66 | FAIL |
| ARHGAP19    | Q14CB8     | Rho GTPase activating protein 19                                    | 1,70 | 3,68 | FAIL |
| ARFIP2      | P53365     | ADP ribosylation factor interacting protein 2                       | 1,70 | 2,70 | FAIL |
| RPS15A      | P62244     | ribosomal protein S15a                                              | 1,70 | 2,05 | FAIL |
| SF3B6       | Q9Y3B4     | splicing factor 3b subunit 6                                        | 1,70 | 1,36 | FAIL |
| MRPS12      | O15235     | mitochondrial ribosomal protein S12                                 | 1,70 | 2,76 | FAIL |
| BCL11B      | Q9C0K0     | BCL11 transcription factor B                                        | 1,70 | 1,92 | FAIL |
| CHAF1A      | Q13111     | chromatin assembly factor 1 subunit A                               | 1,70 | 2,31 | FAIL |
| ALMS1       | Q8TCU4     | ALMS1 centrosome and basal body associated protein                  | 1,69 | 3,06 | FAIL |
| SLC35F2     | Q8IXU6     | solute carrier family 35 member F2                                  | 1,69 | 4,26 | FAIL |
| UBAC2       | Q8NBM4     | UBA domain containing 2                                             | 1,69 | 3,22 | FAIL |
| CTBP1       | Q13363     | C-terminal binding protein 1                                        | 1,69 | 2,45 | FAIL |
| IDE         | P14735     | insulin degrading enzyme                                            | 1,69 | 2,28 | FAIL |
|             | A0A087WZT0 |                                                                     | 1,69 | 2,00 | FAIL |

|         |            |                                                                      |      |      |      |
|---------|------------|----------------------------------------------------------------------|------|------|------|
| DNAJC13 | O75165     | DnaJ heat shock protein family (Hsp40) member C13                    | 1,69 | 3,43 | FAIL |
| SMYD3   | Q9H7B4     | SET and MYND domain containing 3                                     | 1,69 | 1,70 | FAIL |
| PRC1    | O43663     | protein regulator of cytokinesis 1                                   | 1,69 | 1,61 | FAIL |
| TMCO1   | Q9UM00     | transmembrane and coiled-coil domains 1                              | 1,69 | 3,03 | FAIL |
| LMNB2   | Q03252     | lamin B2                                                             | 1,69 | 3,12 | FAIL |
| NPC1    | O15118     | NPC intracellular cholesterol transporter 1                          | 1,69 | 3,89 | FAIL |
| RDH14   | Q9HBH5     | retinol dehydrogenase 14                                             | 1,69 | 1,57 | FAIL |
| FAF2    | Q96CS3     | Fas associated factor family member 2                                | 1,69 | 2,31 | FAIL |
| CYBC1   | H0Y2X1     | cytochrome b-245 chaperone 1                                         | 1,69 | 3,12 | FAIL |
| STAG1   | Q8WVM7     | STAG1 cohesin complex component                                      | 1,68 | 2,01 | FAIL |
| PPM1E   | Q8WY54     | protein phosphatase, Mg <sup>2+</sup> /Mn <sup>2+</sup> dependent 1E | 1,68 | 1,96 | FAIL |
| CCDC124 | Q96CT7     | coiled-coil domain containing 124                                    | 1,68 | 1,58 | FAIL |
| SATB1   | Q01826     | SATB homeobox 1                                                      | 1,68 | 3,51 | FAIL |
| KIF23   | Q02241     | kinesin family member 23                                             | 1,68 | 1,43 | FAIL |
| HSPA8   | P11142     | heat shock protein family A (Hsp70) member 8                         | 1,68 | 1,99 | FAIL |
| THYN1   | Q9P016     | thymocyte nuclear protein 1                                          | 1,68 | 1,57 | FAIL |
| PTPN1   | P18031     | protein tyrosine phosphatase non-receptor type 1                     | 1,68 | 2,18 | FAIL |
| POLDIP2 | Q9Y2S7     | DNA polymerase delta interacting protein 2                           | 1,68 | 1,64 | FAIL |
| PPIA    | P62937     | peptidylprolyl isomerase A                                           | 1,68 | 2,43 | FAIL |
| IP6K1   | Q92551     | inositol hexakisphosphate kinase 1                                   | 1,68 | 1,60 | FAIL |
| YKT6    | O15498     | YKT6 v-SNARE homolog                                                 | 1,68 | 2,62 | FAIL |
| ARHGAP9 | Q9BRR9     | Rho GTPase activating protein 9                                      | 1,68 | 1,97 | FAIL |
|         | A3KFL1     |                                                                      | 1,68 | 2,25 | FAIL |
| CD47    | Q08722     | CD47 molecule                                                        | 1,68 | 3,25 | FAIL |
| MED14   | O60244     | mediator complex subunit 14                                          | 1,68 | 1,89 | FAIL |
| PPP1CC  | P36873     | protein phosphatase 1 catalytic subunit gamma                        | 1,68 | 3,94 | FAIL |
| GMFG    | O60234     | glia maturation factor gamma                                         | 1,68 | 3,54 | FAIL |
| TSC1    | A0A2R8Y5N2 | TSC complex subunit 1                                                | 1,68 | 3,19 | FAIL |
| NUMA1   | Q14980     | nuclear mitotic apparatus protein 1                                  | 1,68 | 3,46 | FAIL |
| POLR2L  | P62875     | RNA polymerase II, I and III subunit L                               | 1,68 | 3,14 | FAIL |
| SFXN1   | Q9H9B4     | sideroflexin 1                                                       | 1,68 | 1,42 | FAIL |
| AKT2    | P31751     | AKT serine/threonine kinase 2                                        | 1,68 | 3,38 | FAIL |
| IPO11   | Q9UI26     | importin 11                                                          | 1,68 | 1,70 | FAIL |
| SLC16A3 | O15427     | solute carrier family 16 member 3                                    | 1,67 | 2,52 | FAIL |
| DROSHA  | Q9NRR4     | drosha ribonuclease III                                              | 1,67 | 1,64 | FAIL |
| UBR5    | O95071     | ubiquitin protein ligase E3 component n-recognin 5                   | 1,67 | 1,77 | FAIL |
| RPS6KA3 | B1AXG1     | ribosomal protein S6 kinase A3                                       | 1,67 | 2,95 | FAIL |
| XRCC5   | P13010     | X-ray repair cross complementing 5                                   | 1,67 | 3,60 | FAIL |
| ATL3    | Q6DD88     | atlastin GTPase 3                                                    | 1,67 | 2,02 | FAIL |
| KIF2A   | A0A6Q8PFA6 | kinesin family member 2A                                             | 1,67 | 3,91 | FAIL |
| USP8    | P40818     | ubiquitin specific peptidase 8                                       | 1,67 | 1,54 | FAIL |
| XRCC3   | G3V399     | X-ray repair cross complementing 3                                   | 1,67 | 1,61 | FAIL |
| UTP15   | Q8TED0     | UTP15 small subunit processome component                             | 1,67 | 2,73 | FAIL |
| SRPRB   | Q9Y5M8     | SRP receptor subunit beta                                            | 1,67 | 3,32 | FAIL |
|         | Q9UJX3     |                                                                      | 1,67 | 2,64 | FAIL |
|         | A0A0A0MSJ9 |                                                                      | 1,67 | 2,29 | FAIL |
| HNRNPH3 | P31942     | heterogeneous nuclear ribonucleoprotein H3                           | 1,67 | 2,30 | FAIL |
| KLC4    | Q9NSK0     | kinesin light chain 4                                                | 1,67 | 1,71 | FAIL |

|          |        |                                                             |      |      |      |
|----------|--------|-------------------------------------------------------------|------|------|------|
| TRMT2A   | Q8IZ69 | tRNA methyltransferase 2 homolog A                          | 1,67 | 1,73 | FAIL |
| ACSL3    | O95573 | acyl-CoA synthetase long chain family member 3              | 1,67 | 3,04 | FAIL |
| ESPL1    | Q14674 | extra spindle pole bodies like 1, separase                  | 1,67 | 2,70 | FAIL |
| COPA     | P53621 | COPI coat complex subunit alpha                             | 1,66 | 3,82 | FAIL |
| SLC25A20 | O43772 | solute carrier family 25 member 20                          | 1,66 | 2,64 | FAIL |
| XPO1     | O14980 | exportin 1                                                  | 1,66 | 3,03 | FAIL |
| YARS1    | P54577 | tyrosyl-tRNA synthetase 1                                   | 1,66 | 1,93 | FAIL |
| RPUSD3   | Q6P087 | RNA pseudouridine synthase D3                               | 1,66 | 1,49 | FAIL |
| NUP133   | Q8WUM0 | nucleoporin 133                                             | 1,66 | 1,64 | FAIL |
| TUBB     | P07437 | tubulin beta class I                                        | 1,66 | 1,80 | FAIL |
| DDX39A   | O00148 | DEXD-box helicase 39A                                       | 1,66 | 1,40 | FAIL |
| CLP1     | Q92989 | cleavage factor polyribonucleotide kinase subunit 1         | 1,66 | 1,96 | FAIL |
| XRN1     | Q8IZH2 | 5'-3' exoribonuclease 1                                     | 1,66 | 1,99 | FAIL |
| RESF1    | Q9HCM1 | retroelement silencing factor 1                             | 1,66 | 1,80 | FAIL |
| INTS3    | Q68E01 | integrator complex subunit 3                                | 1,66 | 2,91 | FAIL |
| DARS1    | P14868 | aspartyl-tRNA synthetase 1                                  | 1,66 | 2,51 | FAIL |
| WDR44    | Q5JSH3 | WD repeat domain 44                                         | 1,66 | 3,05 | FAIL |
| BRPF1    | P55201 | bromodomain and PHD finger containing 1                     | 1,66 | 3,09 | FAIL |
| BTBD2    | Q9BX70 | BTB domain containing 2                                     | 1,66 | 2,39 | FAIL |
| ATP11B   | Q9Y2G3 | ATPase phospholipid transporting 11B (putative)             | 1,65 | 1,84 | FAIL |
| NARS2    | Q96I59 | asparaginyl-tRNA synthetase 2, mitochondrial                | 1,65 | 1,48 | FAIL |
|          | H0YHGO |                                                             | 1,65 | 2,47 | FAIL |
| PDLIM5   | Q96HC4 | PDZ and LIM domain 5                                        | 1,65 | 4,27 | FAIL |
| GSE1     | Q14687 | Gse1 coiled-coil protein                                    | 1,65 | 2,29 | FAIL |
| RAB27A   | H3BVH7 | RAB27A, member RAS oncogene family                          | 1,65 | 3,61 | FAIL |
| NCLN     | Q969V3 | nicalin                                                     | 1,65 | 2,32 | FAIL |
| CCDC154  | A6NI56 | coiled-coil domain containing 154                           | 1,65 | 2,77 | FAIL |
| TEX55    | S4R404 | testis expressed 55                                         | 1,65 | 1,62 | FAIL |
| ZFYVE16  | Q7Z3T8 | zinc finger FYVE-type containing 16                         | 1,65 | 2,59 | FAIL |
| CHCHD3   | C9JRZ6 | coiled-coil-helix-coiled-coil-helix domain containing 3     | 1,65 | 3,46 | FAIL |
| PURB     | Q96QR8 | purine rich element binding protein B                       | 1,65 | 2,31 | FAIL |
| USP36    | Q9P275 | ubiquitin specific peptidase 36                             | 1,65 | 2,10 | FAIL |
| STXBPL   | Q9Y2K9 | syntaxin binding protein 5L                                 | 1,65 | 2,51 | FAIL |
| NNT      | Q13423 | nicotinamide nucleotide transhydrogenase                    | 1,65 | 3,02 | FAIL |
| SPINK5   | Q9NQ38 | serine peptidase inhibitor Kazal type 5                     | 1,65 | 1,95 | FAIL |
| TRIM27   | P14373 | tripartite motif containing 27                              | 1,65 | 1,80 | FAIL |
| SAR1A    | Q9NR31 | secretion associated Ras related GTPase 1A                  | 1,65 | 1,76 | FAIL |
| SLAIN2   | Q9P270 | SLAIN motif family member 2                                 | 1,65 | 3,03 | FAIL |
| SLC7A5   | Q01650 | solute carrier family 7 member 5                            | 1,65 | 1,85 | FAIL |
| CDH18    | D6RER2 | cadherin 18                                                 | 1,64 | 3,47 | FAIL |
| MEPCE    | Q7L2J0 | methylphosphate capping enzyme                              | 1,64 | 2,94 | FAIL |
| DUS2     | E7EUN9 | dihydrouridine synthase 2                                   | 1,64 | 1,92 | FAIL |
| DDX50    | Q9BQ39 | DEXD-box helicase 50                                        | 1,64 | 1,80 | FAIL |
| PCBP2    | F8VZX2 | poly(rC) binding protein 2                                  | 1,64 | 1,70 | FAIL |
| PFKL     | P17858 | phosphofructokinase, liver type                             | 1,64 | 1,69 | FAIL |
| EIF2B5   | Q13144 | eukaryotic translation initiation factor 2B subunit epsilon | 1,64 | 2,53 | FAIL |
| SPAG7    | I3L4C3 | sperm associated antigen 7                                  | 1,64 | 1,51 | FAIL |

|            |            |                                                                |      |      |      |
|------------|------------|----------------------------------------------------------------|------|------|------|
| ABCD1      | P33897     | ATP binding cassette subfamily D member 1                      | 1,64 | 1,40 | FAIL |
| ARF6       | P62330     | ADP ribosylation factor 6                                      | 1,64 | 1,74 | FAIL |
| ATP5PB     | P24539     | ATP synthase peripheral stalk-membrane subunit b               | 1,64 | 3,22 | FAIL |
| SON        | P18583     | SON DNA and RNA binding protein                                | 1,64 | 2,38 | FAIL |
| NIBAN2     | Q96TA1     | niban apoptosis regulator 2                                    | 1,64 | 2,34 | FAIL |
| RHOG       | P84095     | ras homolog family member G                                    | 1,64 | 4,23 | FAIL |
| RAC2       | P15153     | Rac family small GTPase 2                                      | 1,64 | 3,75 | FAIL |
| YBX1       | P67809     | Y-box binding protein 1                                        | 1,64 | 1,82 | FAIL |
| PSD4       | Q8NDX1     | pleckstrin and Sec7 domain containing 4                        | 1,64 | 3,08 | FAIL |
| ZCCHC8     | Q6NZY4     | zinc finger CCHC-type containing 8                             | 1,64 | 1,94 | FAIL |
| GLYR1      | Q49A26     | glyoxylate reductase 1 homolog                                 | 1,64 | 3,55 | FAIL |
| ARHGAP4    | P98171     | Rho GTPase activating protein 4                                | 1,64 | 2,56 | FAIL |
| GOLGB1     | Q14789     | golgin B1                                                      | 1,64 | 1,85 | FAIL |
| ATP13A1    | Q9HD20     | ATPase 13A1                                                    | 1,64 | 1,50 | FAIL |
| RPLP2      | P05387     | ribosomal protein lateral stalk subunit P2                     | 1,63 | 2,72 | FAIL |
| PSMC3      | P17980     | proteasome 26S subunit, ATPase 3                               | 1,63 | 3,91 | FAIL |
| CTDNEP1    | O95476     | CTD nuclear envelope phosphatase 1                             | 1,63 | 3,23 | FAIL |
| UPF1       | Q92900     | UPF1 RNA helicase and ATPase                                   | 1,63 | 2,20 | FAIL |
| VAPA       | Q9P0L0     | VAMP associated protein A                                      | 1,63 | 1,62 | FAIL |
| IPO8       | O15397     | importin 8                                                     | 1,63 | 2,18 | FAIL |
| CCAR2      | Q8N163     | cell cycle and apoptosis regulator 2                           | 1,63 | 3,71 | FAIL |
| RXRB       | P28702     | retinoid X receptor beta                                       | 1,63 | 2,37 | FAIL |
| FKBP8      | Q14318     | FKBP prolyl isomerase 8                                        | 1,63 | 1,86 | FAIL |
| SRP68      | Q9UHB9     | signal recognition particle 68                                 | 1,63 | 4,05 | FAIL |
| PEBP1      | P30086     | phosphatidylethanolamine binding protein 1                     | 1,62 | 3,24 | FAIL |
| C1orf174   | Q8IYL3     | chromosome 1 open reading frame 174                            | 1,62 | 3,06 | FAIL |
| YIPF5      | Q969M3     | Yip1 domain family member 5                                    | 1,62 | 2,42 | FAIL |
| DPM3       | Q9P2X0     | dolichyl-phosphate mannosyltransferase subunit 3, regulatory   | 1,62 | 2,14 | FAIL |
| PPID       | Q08752     | peptidylprolyl isomerase D                                     | 1,62 | 1,41 | FAIL |
| IDH3B      | O43837     | isocitrate dehydrogenase (NAD(+)) 3 non-catalytic subunit beta | 1,62 | 2,73 | FAIL |
| NUP88      | Q99567     | nucleoporin 88                                                 | 1,62 | 2,81 | FAIL |
| CLTC       | A0A087WVQ6 | clathrin heavy chain                                           | 1,62 | 3,13 | FAIL |
|            | Q32MN6     |                                                                | 1,62 | 1,56 | FAIL |
| STT3A      | P46977     | STT3 oligosaccharyltransferase complex catalytic subunit A     | 1,62 | 3,80 | FAIL |
|            | H3BN98     |                                                                | 1,62 | 2,14 | FAIL |
| ARHGAP17   | Q68EM7     | Rho GTPase activating protein 17                               | 1,62 | 2,43 | FAIL |
| DNA2       | P51530     | DNA replication helicase/nuclease 2                            | 1,62 | 2,57 | FAIL |
| NUP210     | Q8TEM1     | nucleoporin 210                                                | 1,62 | 3,25 | FAIL |
| ISY1-RAB43 | Q9ULR0     | ISY1-RAB43 readthrough                                         | 1,62 | 1,51 | FAIL |
| TRABD      | J3KPT4     | TraB domain containing                                         | 1,62 | 2,04 | FAIL |
| NCBP1      | Q09161     | nuclear cap binding protein subunit 1                          | 1,62 | 4,07 | FAIL |
| TRAM1      | Q15629     | translocation associated membrane protein 1                    | 1,62 | 2,20 | FAIL |
| MARS1      | P56192     | methionyl-tRNA synthetase 1                                    | 1,62 | 4,19 | FAIL |

|           |            |                                                                      |      |      |      |
|-----------|------------|----------------------------------------------------------------------|------|------|------|
| KPNA2     | P52292     | karyopherin subunit alpha 2                                          | 1,62 | 2,22 | FAIL |
| ZW10      | O43264     | zw10 kinetochore protein                                             | 1,61 | 1,40 | FAIL |
| VTN       | P04004     | vitronectin                                                          | 1,61 | 2,34 | FAIL |
| TMX1      | Q9H3N1     | thioredoxin related transmembrane protein 1                          | 1,61 | 2,94 | FAIL |
| ERCC2     | P18074     | ERCC excision repair 2, TFIIH core complex helicase subunit          | 1,61 | 2,08 | FAIL |
| USO1      | O60763     | USO1 vesicle transport factor                                        | 1,61 | 3,01 | FAIL |
| SLC3A2    | F5GZS6     | solute carrier family 3 member 2                                     | 1,61 | 1,80 | FAIL |
| ZAP70     | P43403     | zeta chain of T cell receptor associated protein kinase 70           | 1,61 | 3,95 | FAIL |
| OXSRI     | O95747     | oxidative stress responsive kinase 1                                 | 1,61 | 1,62 | FAIL |
| DDX24     | Q9GZR7     | DEAD-box helicase 24                                                 | 1,61 | 1,75 | FAIL |
| AP2M1     | Q96CW1     | adaptor related protein complex 2 subunit mu 1                       | 1,61 | 2,40 | FAIL |
| MTPAP     | Q9NVV4     | mitochondrial poly(A) polymerase                                     | 1,61 | 1,84 | FAIL |
| ARHGAP11A | Q6P4F7     | Rho GTPase activating protein 11A                                    | 1,61 | 1,36 | FAIL |
| SEC62     | F8WCJ7     | SEC62 homolog, preprotein translocation factor                       | 1,61 | 1,53 | FAIL |
| ASCC3     | Q8N3C0     | activating signal cointegrator 1 complex subunit 3                   | 1,61 | 2,68 | FAIL |
| STK19     | B7ZLI8     | serine/threonine kinase 19                                           | 1,61 | 3,81 | FAIL |
| CCZ1      | P86790     | CCZ1 homolog, vacuolar protein trafficking and biogenesis associated | 1,61 | 2,20 | FAIL |
| ASNS      | P08243     | asparagine synthetase (glutamine-hydrolyzing)                        | 1,61 | 2,64 | FAIL |
| THOC3     | Q96J01     | THO complex subunit 3                                                | 1,61 | 1,63 | FAIL |
| RAB1A     | P62820     | RAB1A, member RAS oncogene family                                    | 1,61 | 2,50 | FAIL |
| MBD2      | Q9UBB5     | methyl-CpG binding domain protein 2                                  | 1,61 | 1,95 | FAIL |
| MPC1      | A0A087WVZ0 | mitochondrial pyruvate carrier 1                                     | 1,61 | 1,73 | FAIL |
| UTP3      | Q9NQZ2     | UTP3 small subunit processome component                              | 1,60 | 1,75 | FAIL |
| LMF2      | Q9BU23     | lipase maturation factor 2                                           | 1,60 | 2,77 | FAIL |
|           | A0A1W2PRB8 |                                                                      | 1,60 | 3,14 | FAIL |
| FIRRM     | Q9NSG2     | FIGNL1 interacting regulator of recombination and mitosis            | 1,60 | 2,08 | FAIL |
| RPL24     | P83731     | ribosomal protein L24                                                | 1,60 | 1,54 | FAIL |
| NUDT4     | Q9NZJ9     | nudix hydrolase 4                                                    | 1,60 | 1,57 | FAIL |
| S100B     | A8MRB1     | S100 calcium binding protein B                                       | 1,60 | 3,59 | FAIL |
| DIP2B     | Q9P265     | disco interacting protein 2 homolog B                                | 1,60 | 1,77 | FAIL |
| P2RY8     | Q86VZ1     | P2Y receptor family member 8                                         | 1,60 | 2,94 | FAIL |
| ACSL4     | O60488     | acyl-CoA synthetase long chain family member 4                       | 1,60 | 2,55 | FAIL |
| DCAF10    | Q5QP82     | DDB1 and CUL4 associated factor 10                                   | 1,60 | 2,37 | FAIL |
| RAB5A     | P20339     | RAB5A, member RAS oncogene family                                    | 1,60 | 2,50 | FAIL |
| CTDSPL2   | Q05D32     | CTD small phosphatase like 2                                         | 1,60 | 1,60 | FAIL |
| MMS19     | Q96T76     | MMS19 homolog, cytosolic iron-sulfur assembly component              | 1,60 | 1,70 | FAIL |
| LEMD2     | Q8NC56     | LEM domain nuclear envelope protein 2                                | 1,60 | 1,92 | FAIL |
| KCMF1     | Q9P0J7     | potassium channel modulatory factor 1                                | 1,60 | 1,35 | FAIL |
| SPCS3     | P61009     | signal peptidase complex subunit 3                                   | 1,60 | 3,80 | FAIL |
| GPATCH8   | Q9UKJ3     | G-patch domain containing 8                                          | 1,60 | 2,76 | FAIL |
| MAK16     | Q9BXY0     | MAK16 homolog                                                        | 1,59 | 1,36 | FAIL |
| RAB14     | P61106     | RAB14, member RAS oncogene family                                    | 1,59 | 1,63 | FAIL |

|         |            |                                                          |      |      |      |
|---------|------------|----------------------------------------------------------|------|------|------|
| DHFR    | P00374     | dihydrofolate reductase                                  | 1,59 | 1,42 | FAIL |
| TOP2A   | P11388     | DNA topoisomerase II alpha                               | 1,59 | 2,44 | FAIL |
| STX18   | Q9P2W9     | syntaxin 18                                              | 1,59 | 1,83 | FAIL |
| SMG6    | Q86US8     | SMG6 nonsense mediated mRNA decay factor                 | 1,59 | 2,37 | FAIL |
| SHFL    | Q9NUL5     | shiftless antiviral inhibitor of ribosomal frameshifting | 1,59 | 3,44 | FAIL |
| DUS1L   | H0YGW8     | dihydrouridine synthase 1 like                           | 1,59 | 1,83 | FAIL |
| ACAT2   | Q9BWD1     | acetyl-CoA acetyltransferase 2                           | 1,59 | 1,46 | FAIL |
| UNC13D  | Q70J99     | unc-13 homolog D                                         | 1,59 | 1,84 | FAIL |
| RPL18   | G3V203     | ribosomal protein L18                                    | 1,59 | 2,01 | FAIL |
| SRP72   | O76094     | signal recognition particle 72                           | 1,59 | 1,64 | FAIL |
| AAMP    | C9JG97     | angio associated migratory cell protein                  | 1,59 | 1,81 | FAIL |
| SCYL1   | Q96KG9     | SCY1 like pseudokinase 1                                 | 1,59 | 2,09 | FAIL |
| SEH1L   | Q96EE3     | SEH1 like nucleoporin                                    | 1,59 | 1,93 | FAIL |
| EIF3B   | P55884     | eukaryotic translation initiation factor 3 subunit B     | 1,59 | 3,71 | FAIL |
| TOMM20  | Q15388     | translocase of outer mitochondrial membrane 20           | 1,59 | 2,18 | FAIL |
| VAR51   | P26640     | valyl-tRNA synthetase 1                                  | 1,59 | 2,82 | FAIL |
| EI24    | E9PM05     | EI24 autophagy associated transmembrane protein          | 1,59 | 2,31 | FAIL |
| DNM2    | P50570     | dynamamin 2                                              | 1,59 | 4,39 | FAIL |
| GFUS    | Q13630     | GDP-L-fucose synthase                                    | 1,59 | 3,02 | FAIL |
| CARD11  | Q9BXL7     | caspase recruitment domain family member 11              | 1,58 | 2,32 | FAIL |
| NAA35   | Q5VZE5     | N-alpha-acetyltransferase 35, NatC auxiliary subunit     | 1,58 | 1,41 | FAIL |
| ZDHHC17 | Q8IUH5     | zinc finger DHHC-type palmitoyltransferase 17            | 1,58 | 3,59 | FAIL |
| BYSL    | Q13895     | bystin like                                              | 1,58 | 3,35 | FAIL |
| ABCC5   | O15440     | ATP binding cassette subfamily C member 5                | 1,58 | 1,78 | FAIL |
| SQOR    | Q9Y6N5     | sulfide quinone oxidoreductase                           | 1,58 | 1,64 | FAIL |
| DPY19L1 | A0A1B0GW05 | dpy-19 like C-mannosyltransferase 1                      | 1,58 | 2,47 | FAIL |
| UQCRC1  | P31930     | ubiquinol-cytochrome c reductase core protein 1          | 1,58 | 2,92 | FAIL |
| MAD2L1  | Q13257     | mitotic arrest deficient 2 like 1                        | 1,58 | 2,84 | FAIL |
| RING1   | Q06587     | ring finger protein 1                                    | 1,58 | 2,30 | FAIL |
| RPL7A   | P62424     | ribosomal protein L7a                                    | 1,58 | 2,23 | FAIL |
| NCAPD2  | Q15021     | non-SMC condensin I complex subunit D2                   | 1,58 | 2,23 | FAIL |
| SLC35F6 | Q8N357     | solute carrier family 35 member F6                       | 1,58 | 1,41 | FAIL |
| RBBP4   | Q09028     | RB binding protein 4, chromatin remodeling factor        | 1,58 | 1,71 | FAIL |
| PTRH2   | J3KQ48     | peptidyl-tRNA hydrolase 2                                | 1,58 | 1,58 | FAIL |
| CKAP4   | Q07065     | cytoskeleton associated protein 4                        | 1,58 | 2,23 | FAIL |
| URB1    | O60287     | URB1 ribosome biogenesis homolog                         | 1,58 | 2,97 | FAIL |
| POLR1G  | O15446     | RNA polymerase I subunit G                               | 1,58 | 1,69 | FAIL |
| CSTF2T  | Q9H0L4     | cleavage stimulation factor subunit 2 tau variant        | 1,58 | 2,19 | FAIL |
| SLC16A1 | P53985     | solute carrier family 16 member 1                        | 1,58 | 3,08 | FAIL |
| IGLL1   | P15814     | immunoglobulin lambda like polypeptide 1                 | 1,58 | 1,87 | FAIL |
| PUS1    | G8JLB3     | pseudouridine synthase 1                                 | 1,58 | 3,55 | FAIL |
| PSMD13  | Q9UNM6     | proteasome 26S subunit, non-ATPase 13                    | 1,58 | 1,58 | FAIL |
| TRMU    | B4DZN5     | tRNA mitochondrial 2-thiouridylase                       | 1,58 | 3,13 | FAIL |
| HSPA1A  | A0A0G2JIW1 | heat shock protein family A (Hsp70) member 1A            | 1,58 | 3,06 | FAIL |
| INTS6   | Q9UL03     | integrator complex subunit 6                             | 1,57 | 1,73 | FAIL |
| NUB1    | Q9Y5A7     | negative regulator of ubiquitin like proteins 1          | 1,57 | 2,00 | FAIL |
| NEPRO   | Q6NW34     | nucleolus and neural progenitor protein                  | 1,57 | 1,86 | FAIL |
| HGH1    | Q9BTY7     | HGH1 homolog                                             | 1,57 | 1,97 | FAIL |



|          |            |                                                     |      |      |      |
|----------|------------|-----------------------------------------------------|------|------|------|
| NUP107   | P57740     | nucleoporin 107                                     | 1,57 | 3,03 | FAIL |
| COQ8A    | Q8NI60     | coenzyme Q8A                                        | 1,57 | 1,54 | FAIL |
| HSD17B11 | Q8NBQ5     | hydroxysteroid 17-beta dehydrogenase 11             | 1,57 | 2,13 | FAIL |
| CTBP2    | P56545     | C-terminal binding protein 2                        | 1,57 | 2,72 | FAIL |
| TBC1D10B | Q4KMP7     | TBC1 domain family member 10B                       | 1,57 | 3,15 | FAIL |
| TIMM21   | Q9BVV7     | translocase of inner mitochondrial membrane 21      | 1,57 | 1,81 | FAIL |
|          | A0A0C4DGS9 |                                                     | 1,57 | 2,44 | FAIL |
| SYMPK    | Q92797     | symplekin scaffold protein                          | 1,57 | 2,44 | FAIL |
| COPE     | O14579     | COPI coat complex subunit epsilon                   | 1,57 | 1,41 | FAIL |
| ZNF512   | Q96ME7     | zinc finger protein 512                             | 1,57 | 1,97 | FAIL |
| SLC25A32 | Q9H2D1     | solute carrier family 25 member 32                  | 1,56 | 1,40 | FAIL |
| TIMELESS | Q9UNS1     | timeless circadian regulator                        | 1,56 | 3,65 | FAIL |
| TSGA13   | Q96PP4     | testis specific 13                                  | 1,56 | 1,86 | FAIL |
| TTF2     | Q9UNY4     | transcription termination factor 2                  | 1,56 | 2,89 | FAIL |
| MRPL16   | Q9NX20     | mitochondrial ribosomal protein L16                 | 1,56 | 1,92 | FAIL |
| NELFCD   | X6RLT1     | negative elongation factor complex member C/D       | 1,56 | 1,43 | FAIL |
| ATAD3B   | Q5T9A4     | ATPase family AAA domain containing 3B              | 1,56 | 4,62 | FAIL |
| SPTBN1   | Q01082     | spectrin beta, non-erythrocytic 1                   | 1,56 | 2,63 | FAIL |
| POLR2B   | C9J2Y9     | RNA polymerase II subunit B                         | 1,55 | 2,66 | FAIL |
| COX4I1   | P13073     | cytochrome c oxidase subunit 4I1                    | 1,55 | 2,65 | FAIL |
| MRPS22   | P82650     | mitochondrial ribosomal protein S22                 | 1,55 | 3,21 | FAIL |
| PHGDH    | O43175     | phosphoglycerate dehydrogenase                      | 1,55 | 2,10 | FAIL |
| DVL2     | O14641     | dishevelled segment polarity protein 2              | 1,55 | 1,68 | FAIL |
| KIF22    | Q14807     | kinesin family member 22                            | 1,55 | 3,96 | FAIL |
| FRYL     | O94915     | FRY like transcription coactivator                  | 1,55 | 2,57 | FAIL |
| RHEB     | Q15382     | Ras homolog, mTORC1 binding                         | 1,55 | 3,23 | FAIL |
| PRDX4    | H7C3T4     | peroxiredoxin 4                                     | 1,55 | 2,09 | FAIL |
| DNAJA3   | Q96EY1     | DnaJ heat shock protein family (Hsp40) member A3    | 1,55 | 1,65 | FAIL |
| EMD      | P50402     | emerin                                              | 1,55 | 3,67 | FAIL |
| DOCK10   | Q96BY6     | dedicator of cytokinesis 10                         | 1,54 | 3,11 | FAIL |
| SPC24    | K7EMX1     | SPC24 component of NDC80 kinetochore complex        | 1,54 | 1,72 | FAIL |
| PHC2     | A0A0A0MSI2 | polyhomeotic homolog 2                              | 1,54 | 2,15 | FAIL |
| TUBB4B   | P68371     | tubulin beta 4B class IVb                           | 1,54 | 1,93 | FAIL |
| ABHD16A  | A0A0G2JJD3 | abhydrolase domain containing 16A, phospholipase    | 1,54 | 2,69 | FAIL |
| MSI2     | B4DHE8     | musashi RNA binding protein 2                       | 1,54 | 2,92 | FAIL |
| RPRD1B   | Q9NQG5     | regulation of nuclear pre-mRNA domain containing 1B | 1,54 | 1,96 | FAIL |
| SNW1     | Q13573     | SNW domain containing 1                             | 1,54 | 1,81 | FAIL |
| TMA16    | H0Y9X1     | translation machinery associated 16 homolog         | 1,54 | 1,82 | FAIL |
| ARHGEF2  | V9GYF0     | Rho/Rac guanine nucleotide exchange factor 2        | 1,54 | 2,60 | FAIL |
| SEC61A1  | B4DR61     | SEC61 translocon subunit alpha 1                    | 1,54 | 1,80 | FAIL |
| RABL6    | Q3YEC7     | RAB, member RAS oncogene family like 6              | 1,54 | 1,69 | FAIL |
|          | H7C0V5     |                                                     | 1,54 | 1,53 | FAIL |
| FASTKD2  | Q9NYY8     | FAST kinase domains 2                               | 1,54 | 3,54 | FAIL |
| GNL2     | Q13823     | G protein nucleolar 2                               | 1,54 | 3,42 | FAIL |
| SLC25A1  | P53007     | solute carrier family 25 member 1                   | 1,53 | 3,51 | FAIL |
|          | E7ENN3     |                                                     | 1,53 | 1,64 | FAIL |
| FKBP5    | Q13451     | FKBP prolyl isomerase 5                             | 1,53 | 1,36 | FAIL |
| RECQL    | P46063     | RecQ like helicase                                  | 1,53 | 2,91 | FAIL |

|          |            |                                                                                                   |      |      |      |
|----------|------------|---------------------------------------------------------------------------------------------------|------|------|------|
| POMP     | Q9Y244     | proteasome maturation protein                                                                     | 1,53 | 1,31 | FAIL |
| CTR9     | Q6PD62     | CTR9 homolog, Paf1/RNA polymerase II complex component                                            | 1,53 | 2,14 | FAIL |
| TOE1     | Q96GM8     | target of EGR1, exonuclease                                                                       | 1,53 | 2,43 | FAIL |
| ANKHD1   | Q8IWZ3     | ankyrin repeat and KH domain containing 1                                                         | 1,53 | 3,69 | FAIL |
| RPS4Y1   | P22090     | ribosomal protein S4 Y-linked 1                                                                   | 1,53 | 2,90 | FAIL |
| CHD4     | A0A2U3TZM0 | chromodomain helicase DNA binding protein 4                                                       | 1,53 | 2,26 | FAIL |
| SHPK     | A0A0B4J2A0 | sedoheptulokinase                                                                                 | 1,53 | 1,34 | FAIL |
| CCT6A    | P40227     | chaperonin containing TCP1 subunit 6A                                                             | 1,53 | 1,70 | FAIL |
| TRAPPC1  | I3L3S0     | trafficking protein particle complex subunit 1                                                    | 1,53 | 1,79 | FAIL |
| GTF2H5   | Q6ZYL4     | general transcription factor IIH subunit 5                                                        | 1,53 | 2,89 | FAIL |
| HSD17B10 | Q99714     | hydroxysteroid 17-beta dehydrogenase 10                                                           | 1,53 | 2,18 | FAIL |
| RAD50    | Q92878     | RAD50 double strand break repair protein                                                          | 1,53 | 1,53 | FAIL |
| HSD17B12 | Q53GQ0     | hydroxysteroid 17-beta dehydrogenase 12                                                           | 1,53 | 2,70 | FAIL |
| NARF     | Q9UHQ1     | nuclear prelamin A recognition factor                                                             | 1,53 | 2,09 | FAIL |
| SLIRP    | G3V2S9     | SRA stem-loop interacting RNA binding protein                                                     | 1,53 | 1,42 | FAIL |
| PTK2B    | Q14289     | protein tyrosine kinase 2 beta                                                                    | 1,53 | 2,54 | FAIL |
| SEC24B   | O95487     | SEC24 homolog B, COPII coat complex component                                                     | 1,53 | 2,90 | FAIL |
| RABL2B   | Q9UNT1     | RAB, member of RAS oncogene family like 2B                                                        | 1,53 | 1,50 | FAIL |
| MCM2     | P49736     | minichromosome maintenance complex component 2                                                    | 1,53 | 1,57 | FAIL |
| DOCK2    | Q92608     | dedicator of cytokinesis 2                                                                        | 1,53 | 1,87 | FAIL |
| BAZ2B    | Q9UIF8     | bromodomain adjacent to zinc finger domain 2B                                                     | 1,52 | 1,83 | FAIL |
|          | F5H5I6     |                                                                                                   | 1,52 | 1,79 | FAIL |
| SLX9     | Q9NSI2     | SLX9 ribosome biogenesis factor                                                                   | 1,52 | 1,72 | FAIL |
| SERINC5  | A0A0J9YYI4 | serine incorporator 5                                                                             | 1,52 | 1,75 | FAIL |
| CDK2     | P24941     | cyclin dependent kinase 2                                                                         | 1,52 | 2,68 | FAIL |
| TESC     | Q96BS2     | tescalcin                                                                                         | 1,52 | 2,75 | FAIL |
| INTS11   | Q5TA45     | integrator complex subunit 11                                                                     | 1,52 | 1,36 | FAIL |
| TTC17    | Q96AE7     | tetratricopeptide repeat domain 17                                                                | 1,52 | 1,44 | FAIL |
| MYB      | P10242     | MYB proto-oncogene, transcription factor                                                          | 1,52 | 2,86 | FAIL |
| MTHFD1L  | B7ZM99     | methylenetetrahydrofolate dehydrogenase (NADP+ dependent) 1 like                                  | 1,52 | 2,39 | FAIL |
| YLPM1    | P49750     | YLP motif containing 1                                                                            | 1,52 | 3,39 | FAIL |
| SMARCA5  | O60264     | SWI/SNF related, matrix associated, actin dependent regulator of chromatin, subfamily a, member 5 | 1,52 | 2,98 | FAIL |
| TAOK3    | Q9H2K8     | TAO kinase 3                                                                                      | 1,52 | 2,54 | FAIL |
| ARL2     | P36404     | ADP ribosylation factor like GTPase 2                                                             | 1,51 | 2,67 | FAIL |
| CDK2AP1  | O14519     | cyclin dependent kinase 2 associated protein 1                                                    | 1,51 | 1,92 | FAIL |
| ORC5     | O43913     | origin recognition complex subunit 5                                                              | 1,51 | 1,35 | FAIL |
| TRIM33   | Q9UPN9     | tripartite motif containing 33                                                                    | 1,51 | 3,02 | FAIL |
| CWC15    | Q9P013     | CWC15 spliceosome associated protein homolog                                                      | 1,51 | 1,73 | FAIL |
| MCM9     | Q9NXL9     | minichromosome maintenance 9 homologous recombination repair factor                               | 1,51 | 2,58 | FAIL |
| RBM7     | J3KPD3     | RNA binding motif protein 7                                                                       | 1,51 | 1,79 | FAIL |
| SYNGR2   | K7ELS8     | synaptogyrin 2                                                                                    | 1,51 | 2,27 | FAIL |

|         |            |                                                         |      |      |      |
|---------|------------|---------------------------------------------------------|------|------|------|
| ARPC4   | P59998     | actin related protein 2/3 complex subunit 4             | 1,51 | 2,01 | FAIL |
| CHERP   | Q8IWX8     | calcium homeostasis endoplasmic reticulum protein       | 1,51 | 1,64 | FAIL |
| MAP2K3  | P46734     | mitogen-activated protein kinase kinase 3               | 1,51 | 2,37 | FAIL |
| RAP1GAP | F2Z357     | RAP1 GTPase activating protein                          | 1,51 | 2,51 | FAIL |
| GRWD1   | Q9BQ67     | glutamate rich WD repeat containing 1                   | 1,51 | 2,47 | FAIL |
| CHD1    | O14646     | chromodomain helicase DNA binding protein 1             | 1,51 | 3,70 | FAIL |
| CWC22   | Q9HCG8     | CWC22 spliceosome associated protein homolog            | 1,50 | 2,33 | FAIL |
| ARF3    | P61204     | ADP ribosylation factor 3                               | 1,50 | 1,93 | FAIL |
| KAT8    | Q9H7Z6     | lysine acetyltransferase 8                              | 1,50 | 2,61 | FAIL |
| TEX264  | A0A087WTU3 | testis expressed 264, ER-phagy receptor                 | 1,50 | 2,61 | FAIL |
| MRPS34  | C9JJ19     | mitochondrial ribosomal protein S34                     | 1,50 | 2,45 | FAIL |
| SBNO1   | A3KN83     | strawberry notch homolog 1                              | 1,50 | 1,52 | FAIL |
| VPS52   | Q8N1B4     | VPS52 subunit of GARP complex                           | 1,50 | 1,94 | FAIL |
| PSMC5   | P62195     | proteasome 26S subunit, ATPase 5                        | 1,50 | 1,85 | FAIL |
| DCAKD   | Q8WVC6     | dephospho-CoA kinase domain containing                  | 1,50 | 2,98 | FAIL |
| DEF6    | Q9H4E7     | DEF6 guanine nucleotide exchange factor                 | 1,50 | 2,85 | FAIL |
| WDR37   | Q9Y2I8     | WD repeat domain 37                                     | 1,50 | 2,16 | FAIL |
| FO XK2  | Q01167     | forkhead box K2                                         | 1,50 | 2,39 | FAIL |
| ARL8A   | Q96BM9     | ADP ribosylation factor like GTPase 8A                  | 1,50 | 2,13 | FAIL |
| MBOAT7  | Q96N66     | membrane bound O-acyltransferase domain containing<br>7 | 1,49 | 3,91 | FAIL |
| SNRPB   | P14678     | small nuclear ribonucleoprotein polypeptides B and B1   | 1,49 | 1,75 | FAIL |
| BCAS2   | O75934     | BCAS2 pre-mRNA processing factor                        | 1,49 | 2,47 | FAIL |
| VPS35L  | E7EWW0     | VPS35 endosomal protein sorting factor like             | 1,49 | 1,55 | FAIL |
| ARCNI   | P48444     | archain 1                                               | 1,49 | 1,47 | FAIL |
| RHBDD2  | Q6NTF9     | rhomboid domain containing 2                            | 1,49 | 1,98 | FAIL |
| DYM     | Q7RTS9     | dymedlin                                                | 1,49 | 3,12 | FAIL |
| NUP93   | Q8N1F7     | nucleoporin 93                                          | 1,49 | 3,06 | FAIL |
| GOLPH3  | Q9H4A6     | golgi phosphoprotein 3                                  | 1,49 | 2,32 | FAIL |
| POLR1B  | Q9H9Y6     | RNA polymerase I subunit B                              | 1,49 | 3,79 | FAIL |
| SLC35A1 | P78382     | solute carrier family 35 member A1                      | 1,49 | 1,42 | FAIL |
| TMPO    | P42167     | thymopoietin                                            | 1,49 | 2,04 | FAIL |
| CCT5    | P48643     | chaperonin containing TCP1 subunit 5                    | 1,49 | 1,62 | FAIL |
| KDM3A   | Q9Y4C1     | lysine demethylase 3A                                   | 1,49 | 2,00 | FAIL |
| FHL2    | Q14192     | four and a half LIM domains 2                           | 1,49 | 2,31 | FAIL |
| NUP62   | P37198     | nucleoporin 62                                          | 1,49 | 1,73 | FAIL |
| CRTC2   | Q53ET0     | CREB regulated transcription coactivator 2              | 1,49 | 2,13 | FAIL |
| SAC3D1  | F8WC89     | SAC3 domain containing 1                                | 1,49 | 2,78 | FAIL |
| PTP4A2  | Q12974     | protein tyrosine phosphatase 4A2                        | 1,49 | 1,49 | FAIL |
| CTPS1   | P17812     | CTP synthase 1                                          | 1,49 | 4,25 | FAIL |
| RASSF2  | P50749     | Ras association domain family member 2                  | 1,49 | 1,41 | FAIL |
| CDS2    | O95674     | CDP-diacylglycerol synthase 2                           | 1,49 | 5,00 | FAIL |
| PDCD11  | Q14690     | programmed cell death 11                                | 1,49 | 2,85 | FAIL |
| GPD1L   | Q8N335     | glycerol-3-phosphate dehydrogenase 1 like               | 1,49 | 2,82 | FAIL |
| RPL8    | P62917     | ribosomal protein L8                                    | 1,48 | 2,82 | FAIL |
| RAB11B  | Q15907     | RAB11B, member RAS oncogene family                      | 1,48 | 1,49 | FAIL |
| SAMD1   | Q6SPF0     | sterile alpha motif domain containing 1                 | 1,48 | 2,17 | FAIL |
| SNU13   | A0A3B3IUA2 | small nuclear ribonucleoprotein 13                      | 1,48 | 1,76 | FAIL |

|        |            |                                                                      |      |      |      |
|--------|------------|----------------------------------------------------------------------|------|------|------|
| PCID2  | Q5JVF3     | PCI domain containing 2                                              | 1,48 | 3,38 | FAIL |
| GNL3   | Q9BVP2     | G protein nucleolar 3                                                | 1,48 | 1,50 | FAIL |
| TERF2  | Q15554     | telomeric repeat binding factor 2                                    | 1,48 | 1,60 | FAIL |
| NOC4L  | Q9BVI4     | nucleolar complex associated 4 homolog                               | 1,48 | 1,59 | FAIL |
| SMYD2  | Q9NRG4     | SET and MYND domain containing 2                                     | 1,48 | 2,15 | FAIL |
| STAT3  | P40763     | signal transducer and activator of transcription 3                   | 1,48 | 4,43 | FAIL |
| DDX3Y  | O15523     | DEAD-box helicase 3 Y-linked                                         | 1,48 | 1,99 | FAIL |
| NDUFA4 | O00483     | NDUFA4 mitochondrial complex associated                              | 1,48 | 2,89 | FAIL |
| PAN2   | Q504Q3     | poly(A) specific ribonuclease subunit PAN2                           | 1,48 | 1,49 | FAIL |
| GOLGA7 | Q7Z5G4     | golgin A7                                                            | 1,48 | 1,90 | FAIL |
| CLN6   | H3BUV4     | CLN6 transmembrane ER protein                                        | 1,47 | 1,74 | FAIL |
| VPS4B  | O75351     | vacuolar protein sorting 4 homolog B                                 | 1,47 | 3,89 | FAIL |
| ARF4   | P18085     | ADP ribosylation factor 4                                            | 1,47 | 2,56 | FAIL |
| PDS5A  | Q29RF7     | PDS5 cohesin associated factor A                                     | 1,47 | 3,01 | FAIL |
| REEP4  | Q9H6H4     | receptor accessory protein 4                                         | 1,47 | 1,81 | FAIL |
|        | A0A3B3ITX4 |                                                                      | 1,47 | 2,65 | FAIL |
| MRPL11 | Q9Y3B7     | mitochondrial ribosomal protein L11                                  | 1,47 | 1,79 | FAIL |
| PHF20  | Q5JWZ0     | PHD finger protein 20                                                | 1,47 | 1,60 | FAIL |
| GAS2L1 | A0A5E8     | growth arrest specific 2 like 1                                      | 1,47 | 3,00 | FAIL |
| JPH1   | Q9HDC5     | junctophilin 1                                                       | 1,47 | 2,55 | FAIL |
| BLM    | P54132     | BLM RecQ like helicase                                               | 1,47 | 2,44 | FAIL |
| COMT   | P21964     | catechol-O-methyltransferase                                         | 1,47 | 3,05 | FAIL |
| CDC5L  | Q99459     | cell division cycle 5 like                                           | 1,47 | 2,54 | FAIL |
| FERMT3 | Q86UX7     | FERM domain containing kindlin 3                                     | 1,47 | 3,08 | FAIL |
| HAUS6  | Q7Z4H7     | HAUS augmin like complex subunit 6                                   | 1,47 | 2,03 | FAIL |
| EPRS1  | P07814     | glutamyl-prolyl-tRNA synthetase 1                                    | 1,46 | 2,35 | FAIL |
| JUND   | P17535     | JunD proto-oncogene, AP-1 transcription factor subunit               | 1,46 | 1,57 | FAIL |
| ABCB10 | Q9NRK6     | ATP binding cassette subfamily B member 10                           | 1,46 | 3,08 | FAIL |
| RAB10  | P61026     | RAB10, member RAS oncogene family                                    | 1,46 | 1,76 | FAIL |
| MAPRE2 | Q15555     | microtubule associated protein RP/EB family member 2                 | 1,46 | 3,56 | FAIL |
| NSG1   | P42857     | neuronal vesicle trafficking associated 1                            | 1,46 | 1,43 | FAIL |
| FCGBP  | Q9Y6R7     | Fc gamma binding protein                                             | 1,46 | 2,56 | FAIL |
|        | A0A0A0MSU2 |                                                                      | 1,46 | 1,67 | FAIL |
| GTF2E2 | P29084     | general transcription factor IIE subunit 2                           | 1,46 | 3,71 | FAIL |
| RNF2   | Q99496     | ring finger protein 2                                                | 1,46 | 1,49 | FAIL |
| RAB33A | Q14088     | RAB33A, member RAS oncogene family                                   | 1,46 | 2,56 | FAIL |
| RPS20  | P60866     | ribosomal protein S20                                                | 1,46 | 1,52 | FAIL |
|        | A0A669KAZ0 |                                                                      | 1,46 | 1,87 | FAIL |
| TIMP1  | Q5H9B4     | TIMP metalloproteinase inhibitor 1                                   | 1,46 | 3,36 | FAIL |
| MAGI1  | Q96QZ7     | membrane associated guanylate kinase, WW and PDZ domain containing 1 | 1,46 | 1,97 | FAIL |
| NSUN5  | Q96P11     | NOP2/Sun RNA methyltransferase 5                                     | 1,46 | 2,09 | FAIL |
| CHD2   | O14647     | chromodomain helicase DNA binding protein 2                          | 1,46 | 1,95 | FAIL |
| CXCR4  | P61073     | C-X-C motif chemokine receptor 4                                     | 1,45 | 2,36 | FAIL |
| TELO2  | Q9Y4R8     | telomere maintenance 2                                               | 1,45 | 2,77 | FAIL |
| IK     | Q13123     | IK cytokine                                                          | 1,45 | 1,60 | FAIL |
| TFRC   | P02786     | transferrin receptor                                                 | 1,45 | 2,16 | FAIL |

|          |            |                                                                              |      |      |      |
|----------|------------|------------------------------------------------------------------------------|------|------|------|
| SDR39U1  | Q9NRG7     | short chain dehydrogenase/reductase family 39U member 1                      | 1,45 | 2,02 | FAIL |
| IPO9     | Q96P70     | importin 9                                                                   | 1,45 | 2,59 | FAIL |
| LRRC59   | Q96AG4     | leucine rich repeat containing 59                                            | 1,45 | 3,19 | FAIL |
| SNX6     | Q9UNH7     | sorting nexin 6                                                              | 1,45 | 2,41 | FAIL |
| NDUFA9   | Q16795     | NADH:ubiquinone oxidoreductase subunit A9                                    | 1,45 | 2,75 | FAIL |
| ERLIN1   | O75477     | ER lipid raft associated 1                                                   | 1,45 | 2,04 | FAIL |
| CDT1     | Q9H211     | chromatin licensing and DNA replication factor 1                             | 1,45 | 4,29 | FAIL |
| KIF11    | P52732     | kinesin family member 11                                                     | 1,45 | 3,42 | FAIL |
| PSMD8    | P48556     | proteasome 26S subunit, non-ATPase 8                                         | 1,45 | 3,16 | FAIL |
| TENM2    | Q9NT68     | teneurin transmembrane protein 2                                             | 1,45 | 1,78 | FAIL |
| TUBG1    | P23258     | tubulin gamma 1                                                              | 1,45 | 1,86 | FAIL |
| RPS28    | P62857     | ribosomal protein S28                                                        | 1,45 | 1,87 | FAIL |
| WDR3     | Q9UNX4     | WD repeat domain 3                                                           | 1,45 | 3,90 | FAIL |
| RARS2    | Q5T160     | arginyl-tRNA synthetase 2, mitochondrial                                     | 1,45 | 1,56 | FAIL |
| SARS1    | Q5T5C7     | seryl-tRNA synthetase 1                                                      | 1,45 | 2,30 | FAIL |
| EHD1     | A0A024R571 | EH domain containing 1                                                       | 1,45 | 2,24 | FAIL |
| FXR2     | P51116     | FMR1 autosomal homolog 2                                                     | 1,45 | 3,36 | FAIL |
| TOR1AIP2 | Q8NFK8     | torsin 1A interacting protein 2                                              | 1,45 | 1,45 | FAIL |
| ERGIC1   | Q969X5     | endoplasmic reticulum-golgi intermediate compartment 1                       | 1,45 | 2,71 | FAIL |
| THNSL1   | Q8IYQ7     | threonine synthase like 1                                                    | 1,45 | 1,85 | FAIL |
| ALDH5A1  | P51649     | aldehyde dehydrogenase 5 family member A1                                    | 1,45 | 1,55 | FAIL |
| ARNT     | P27540     | aryl hydrocarbon receptor nuclear translocator                               | 1,44 | 2,01 | FAIL |
| HADHB    | P55084     | hydroxyacyl-CoA dehydrogenase trifunctional multienzyme complex subunit beta | 1,44 | 3,60 | FAIL |
| MDH1     | B8ZZ51     | malate dehydrogenase 1                                                       | 1,44 | 1,34 | FAIL |
| PRDX2    | P32119     | peroxiredoxin 2                                                              | 1,44 | 2,43 | FAIL |
| SLC25A3  | Q00325     | solute carrier family 25 member 3                                            | 1,44 | 2,14 | FAIL |
| DNM1L    | O00429     | dynamitin 1 like                                                             | 1,44 | 1,58 | FAIL |
| RPS3     | P23396     | ribosomal protein S3                                                         | 1,44 | 2,56 | FAIL |
| LENG8    | A0A087WUE4 | leukocyte receptor cluster member 8                                          | 1,44 | 1,63 | FAIL |
| MRPS27   | G5EA06     | mitochondrial ribosomal protein S27                                          | 1,44 | 2,27 | FAIL |
| HNRNPF   | P52597     | heterogeneous nuclear ribonucleoprotein F                                    | 1,44 | 3,43 | FAIL |
| CYBA     | P13498     | cytochrome b-245 alpha chain                                                 | 1,44 | 1,97 | FAIL |
| ORMDL2   | F8VXD5     | ORMDL sphingolipid biosynthesis regulator 2                                  | 1,44 | 2,25 | FAIL |
| TARS2    | Q9BW92     | threonyl-tRNA synthetase 2, mitochondrial                                    | 1,44 | 2,43 | FAIL |
| HAUS1    | Q96CS2     | HAUS augmin like complex subunit 1                                           | 1,44 | 1,50 | FAIL |
| STOML2   | Q9UJZ1     | stomatin like 2                                                              | 1,44 | 2,37 | FAIL |
| NOP56    | O00567     | NOP56 ribonucleoprotein                                                      | 1,43 | 1,81 | FAIL |
| DHCR24   | Q15392     | 24-dehydrocholesterol reductase                                              | 1,43 | 3,23 | FAIL |
| CPSF2    | Q9P2I0     | cleavage and polyadenylation specific factor 2                               | 1,43 | 3,57 | FAIL |
| MCM4     | P33991     | minichromosome maintenance complex component 4                               | 1,43 | 4,11 | FAIL |
| CHTF18   | Q8WVB6     | chromosome transmission fidelity factor 18                                   | 1,43 | 2,36 | FAIL |
| FAM120A  | Q9NZB2     | family with sequence similarity 120 member A                                 | 1,43 | 2,56 | FAIL |
| RPS27L   | Q71UM5     | ribosomal protein S27 like                                                   | 1,43 | 1,92 | FAIL |
| ACOT7    | O00154     | acyl-CoA thioesterase 7                                                      | 1,43 | 1,33 | FAIL |

|         |            |                                                                                                      |      |      |      |
|---------|------------|------------------------------------------------------------------------------------------------------|------|------|------|
|         | Q5TZK3     |                                                                                                      | 1,43 | 3,27 | FAIL |
| HNRNPR  | O43390     | heterogeneous nuclear ribonucleoprotein R                                                            | 1,43 | 2,18 | FAIL |
| AKAP8   | O43823     | A-kinase anchoring protein 8                                                                         | 1,43 | 1,41 | FAIL |
| COPZ1   | P61923     | COPI coat complex subunit zeta 1                                                                     | 1,43 | 2,67 | FAIL |
| TMEM68  | Q96MH6     | transmembrane protein 68                                                                             | 1,43 | 2,18 | FAIL |
| COPG1   | Q9Y678     | COPI coat complex subunit gamma 1                                                                    | 1,43 | 2,29 | FAIL |
| SMARCA4 | P51532     | SWI/SNF related, matrix associated, actin dependent<br>regulator of chromatin, subfamily a, member 4 | 1,43 | 2,75 | FAIL |
| DNAAF5  | Q86Y56     | dynein axonemal assembly factor 5                                                                    | 1,42 | 2,17 | FAIL |
| EXOC4   | Q96A65     | exocyst complex component 4                                                                          | 1,42 | 2,21 | FAIL |
| EXOC3   | O60645     | exocyst complex component 3                                                                          | 1,42 | 1,39 | FAIL |
| KATNA1  | O75449     | katanin catalytic subunit A1                                                                         | 1,42 | 3,06 | FAIL |
| PTBP1   | A6NLN1     | polypyrimidine tract binding protein 1                                                               | 1,42 | 3,14 | FAIL |
|         | F6Y5H0     |                                                                                                      | 1,42 | 3,19 | FAIL |
| RFTN1   | Q14699     | raftlin, lipid raft linker 1                                                                         | 1,42 | 1,69 | FAIL |
| RPS27   | P42677     | ribosomal protein S27                                                                                | 1,42 | 1,88 | FAIL |
| RRAGC   | Q9HB90     | Ras related GTP binding C                                                                            | 1,42 | 2,24 | FAIL |
| RAB6A   | P20340     | RAB6A, member RAS oncogene family                                                                    | 1,42 | 2,58 | FAIL |
| ADAR    | P55265     | adenosine deaminase RNA specific                                                                     | 1,42 | 3,14 | FAIL |
| NOM1    | Q5C9Z4     | nucleolar protein with MIF4G domain 1                                                                | 1,41 | 1,90 | FAIL |
| SLC38A9 | D6R9X0     | solute carrier family 38 member 9                                                                    | 1,41 | 3,23 | FAIL |
| SLC25A6 | P12236     | solute carrier family 25 member 6                                                                    | 1,41 | 1,65 | FAIL |
| RTN1    | A8MT72     | reticulin 1                                                                                          | 1,41 | 2,33 | FAIL |
| TMEM41B | Q5BJD5     | transmembrane protein 41B                                                                            | 1,41 | 1,69 | FAIL |
| PLEKHA7 | E9PKC0     | pleckstrin homology domain containing A7                                                             | 1,41 | 1,39 | FAIL |
| BOP1    | Q14137     | BOP1 ribosomal biogenesis factor                                                                     | 1,41 | 2,00 | FAIL |
| SLC25A4 | P12235     | solute carrier family 25 member 4                                                                    | 1,41 | 2,37 | FAIL |
| XRCC6   | P12956     | X-ray repair cross complementing 6                                                                   | 1,41 | 1,72 | FAIL |
| LSM6    | P62312     | LSM6 homolog, U6 small nuclear RNA and mRNA deg-<br>radation associated                              | 1,41 | 3,55 | FAIL |
| FANCI   | Q9NVI1     | FA complementation group I                                                                           | 1,41 | 1,83 | FAIL |
| ORAI1   | Q96D31     | ORAI calcium release-activated calcium modulator 1                                                   | 1,40 | 2,07 | FAIL |
| UBE2M   | P61081     | ubiquitin conjugating enzyme E2 M                                                                    | 1,40 | 1,94 | FAIL |
| DTX1    | Q86Y01     | deltex E3 ubiquitin ligase 1                                                                         | 1,40 | 1,84 | FAIL |
| GLUL    | A0A2R8YDT1 | glutamate-ammonia ligase                                                                             | 1,40 | 1,39 | FAIL |
|         | F8W6I7     |                                                                                                      | 1,40 | 1,45 | FAIL |
| PSMB10  | P40306     | proteasome 20S subunit beta 10                                                                       | 1,40 | 1,42 | FAIL |
| STXBP4  | Q6ZWJ1     | syntaxin binding protein 4                                                                           | 1,39 | 2,46 | FAIL |
| CAMK2D  | Q13557     | calcium/calmodulin dependent protein kinase II delta                                                 | 1,39 | 2,64 | FAIL |
| MDN1    | Q9NU22     | midasin AAA ATPase 1                                                                                 | 1,39 | 2,48 | FAIL |
| MRPL24  | Q96A35     | mitochondrial ribosomal protein L24                                                                  | 1,39 | 1,60 | FAIL |
| MBD1    | Q9UIS9     | methyl-CpG binding domain protein 1                                                                  | 1,39 | 1,65 | FAIL |
| UROS    | A0A087X021 | uroporphyrinogen III synthase                                                                        | 1,39 | 3,88 | FAIL |
| LRRC36  | Q1X8D7     | leucine rich repeat containing 36                                                                    | 1,39 | 3,88 | FAIL |
| ATP5ME  | P56385     | ATP synthase membrane subunit e                                                                      | 1,39 | 2,52 | FAIL |
| RFC1    | P35251     | replication factor C subunit 1                                                                       | 1,39 | 2,15 | FAIL |

|             |            |                                                                                                      |      |      |      |
|-------------|------------|------------------------------------------------------------------------------------------------------|------|------|------|
| FOCAD       | Q5VW36     | focadhesin                                                                                           | 1,39 | 3,71 | FAIL |
| HSPA5       | P11021     | heat shock protein family A (Hsp70) member 5                                                         | 1,39 | 2,66 | FAIL |
| RAF1        | P04049     | Raf-1 proto-oncogene, serine/threonine kinase                                                        | 1,39 | 1,73 | FAIL |
| JAGN1       | Q8N5M9     | jagunal homolog 1                                                                                    | 1,39 | 1,77 | FAIL |
| TKFC        | Q3LXA3     | triokinase and FMN cyclase                                                                           | 1,39 | 1,61 | FAIL |
| KDM5C       | P41229     | lysine demethylase 5C                                                                                | 1,39 | 1,88 | FAIL |
| TP53I11     | E9PIN5     | tumor protein p53 inducible protein 11                                                               | 1,39 | 2,19 | FAIL |
| MYO9B       | M0R0P8     | myosin IXB                                                                                           | 1,38 | 3,16 | FAIL |
| DDX42       | Q86XP3     | DEAD-box helicase 42                                                                                 | 1,38 | 3,34 | FAIL |
| ATP5PD      | O75947     | ATP synthase peripheral stalk subunit d                                                              | 1,38 | 3,54 | FAIL |
| PPAN-P2RY11 | A0A0B4J1V8 | PPAN-P2RY11 readthrough                                                                              | 1,38 | 2,88 | FAIL |
| RPS5        | M0R0F0     | ribosomal protein S5                                                                                 | 1,38 | 3,63 | FAIL |
| CENPB       | P07199     | centromere protein B                                                                                 | 1,38 | 2,93 | FAIL |
| AFG3L2      | Q9Y4W6     | AFG3 like matrix AAA peptidase subunit 2                                                             | 1,38 | 1,93 | FAIL |
| TCOF1       | E7ETY2     | treacle ribosome biogenesis factor 1                                                                 | 1,38 | 3,07 | FAIL |
| TONSL       | Q96HA7     | tonsoku like, DNA repair protein                                                                     | 1,38 | 2,13 | FAIL |
| MTHFD1      | P11586     | methylenetetrahydrofolate dehydrogenase, cyclohydro-<br>lase and formyltetrahydrofolate synthetase 1 | 1,38 | 2,90 | FAIL |
| POLD3       | Q15054     | DNA polymerase delta 3, accessory subunit                                                            | 1,38 | 3,26 | FAIL |
| ABCF2       | Q9UG63     | ATP binding cassette subfamily F member 2                                                            | 1,38 | 1,73 | FAIL |
| OGT         | O15294     | O-linked N-acetylglucosamine (GlcNAc) transferase                                                    | 1,38 | 1,43 | FAIL |
| GMPPA       | Q96IJ6     | GDP-mannose pyrophosphorylase A                                                                      | 1,38 | 1,87 | FAIL |
| EIF3F       | O00303     | eukaryotic translation initiation factor 3 subunit F                                                 | 1,38 | 2,52 | FAIL |
| TDRD3       | Q9H7E2     | tudor domain containing 3                                                                            | 1,38 | 1,59 | FAIL |
| PWP1        | B4DJV5     | PWP1 homolog, endonuclease                                                                           | 1,38 | 2,02 | FAIL |
| CPSF4       | O95639     | cleavage and polyadenylation specific factor 4                                                       | 1,38 | 2,01 | FAIL |
| NPM1        | P06748     | nucleophosmin 1                                                                                      | 1,38 | 1,80 | FAIL |
| SF3B1       | O75533     | splicing factor 3b subunit 1                                                                         | 1,38 | 2,43 | FAIL |
| TCERG1      | O14776     | transcription elongation regulator 1                                                                 | 1,38 | 2,74 | FAIL |
| NFRKB       | Q6P4R8     | nuclear factor related to kappaB binding protein                                                     | 1,38 | 1,70 | FAIL |
| TBRG4       | Q969Z0     | transforming growth factor beta regulator 4                                                          | 1,37 | 3,11 | FAIL |
| CHUK        | O15111     | component of inhibitor of nuclear factor kappa B kinase<br>complex                                   | 1,37 | 1,53 | FAIL |
| SLC25A22    | E9PJH7     | solute carrier family 25 member 22                                                                   | 1,37 | 2,93 | FAIL |
| XPO7        | E7ESC6     | exportin 7                                                                                           | 1,37 | 2,75 | FAIL |
| TEX30       | A0A0C4DFW4 | testis expressed 30                                                                                  | 1,37 | 1,38 | FAIL |
| NMD3        | Q96D46     | NMD3 ribosome export adaptor                                                                         | 1,37 | 1,33 | FAIL |
| EIF2B4      | E7ERK9     | eukaryotic translation initiation factor 2B subunit delta                                            | 1,37 | 2,47 | FAIL |
| RPL17       | J3KRX5     | ribosomal protein L17                                                                                | 1,37 | 1,62 | FAIL |
| GPBP1L1     | Q9HC44     | GC-rich promoter binding protein 1 like 1                                                            | 1,37 | 2,12 | FAIL |
| MAP3K6      | O95382     | mitogen-activated protein kinase kinase kinase 6                                                     | 1,37 | 1,30 | FAIL |
| RPLP0       | P05388     | ribosomal protein lateral stalk subunit P0                                                           | 1,37 | 1,98 | FAIL |
| PNO1        | Q9NRX1     | partner of NOB1 homolog                                                                              | 1,37 | 1,99 | FAIL |
| TBC1D31     | E5RI94     | TBC1 domain family member 31                                                                         | 1,37 | 2,39 | FAIL |
| HEATR1      | Q9H583     | HEAT repeat containing 1                                                                             | 1,37 | 1,57 | FAIL |
| LEO1        | Q8WVC0     | LEO1 homolog, Paf1/RNA polymerase II complex com-<br>ponent                                          | 1,37 | 2,68 | FAIL |

|          |            |                                                                                                                       |      |      |      |
|----------|------------|-----------------------------------------------------------------------------------------------------------------------|------|------|------|
| DNAJB6   | A0A0J9YX62 | DnaJ heat shock protein family (Hsp40) member B6                                                                      | 1,36 | 2,37 | FAIL |
| ARPC2    | O15144     | actin related protein 2/3 complex subunit 2                                                                           | 1,36 | 1,52 | FAIL |
| POLR1E   | Q9GZS1     | RNA polymerase I subunit E                                                                                            | 1,36 | 3,84 | FAIL |
| SVIL     | A0A6I8PIX7 | supervillin                                                                                                           | 1,36 | 2,78 | FAIL |
| SMARCAD1 | Q9H4L7     | SWI/SNF-related, matrix-associated actin-dependent<br>regulator of chromatin, subfamily a, containing<br>DEAD/H box 1 | 1,36 | 2,56 | FAIL |
| POLRMT   | O00411     | RNA polymerase mitochondrial                                                                                          | 1,36 | 1,82 | FAIL |
| TRMT1L   | Q7Z2T5     | tRNA methyltransferase 1 like                                                                                         | 1,36 | 1,51 | FAIL |
|          | A0A024RAC6 |                                                                                                                       | 1,36 | 1,84 | FAIL |
| COPG2    | Q9UBF2     | COPI coat complex subunit gamma 2                                                                                     | 1,36 | 3,17 | FAIL |
| AP2B1    | A0A087X253 | adaptor related protein complex 2 subunit beta 1                                                                      | 1,36 | 2,99 | FAIL |
| LEMD3    | Q9Y2U8     | LEM domain containing 3                                                                                               | 1,36 | 1,97 | FAIL |
| CDC27    | G5EA36     | cell division cycle 27                                                                                                | 1,36 | 4,36 | FAIL |
| EP400    | Q96L91     | E1A binding protein p400                                                                                              | 1,36 | 2,25 | FAIL |
| CSTF3    | Q12996     | cleavage stimulation factor subunit 3                                                                                 | 1,36 | 1,82 | FAIL |
| BLOC1S5  | Q8TDH9     | biogenesis of lysosomal organelles complex 1 subunit 5                                                                | 1,36 | 1,97 | FAIL |
| CBX3     | Q13185     | chromobox 3                                                                                                           | 1,36 | 1,63 | FAIL |
| MAP1A    | E9PGC8     | microtubule associated protein 1A                                                                                     | 1,35 | 2,04 | FAIL |
| RCC1     | P18754     | regulator of chromosome condensation 1                                                                                | 1,35 | 2,69 | FAIL |
| TECR     | Q9NZ01     | trans-2,3-enoyl-CoA reductase                                                                                         | 1,35 | 1,79 | FAIL |
| HK2      | E9PB90     | hexokinase 2                                                                                                          | 1,35 | 1,30 | FAIL |
| SIX6     | O95475     | SIX homeobox 6                                                                                                        | 1,35 | 3,16 | FAIL |
| PFKP     | Q01813     | phosphofructokinase, platelet                                                                                         | 1,35 | 1,74 | FAIL |
| NIPSNAP2 | O75323     | nipsnap homolog 2                                                                                                     | 1,35 | 3,23 | FAIL |
| FUBP3    | Q96I24     | far upstream element binding protein 3                                                                                | 1,35 | 3,24 | FAIL |
| PSIP1    | O75475     | PC4 and SRSF1 interacting protein 1                                                                                   | 1,35 | 2,28 | FAIL |
| C12orf43 | F5H7W8     | chromosome 12 open reading frame 43                                                                                   | 1,35 | 1,56 | FAIL |
| DDX21    | Q9NR30     | DEXD-box helicase 21                                                                                                  | 1,35 | 2,00 | FAIL |
| MCU      | Q8NE86     | mitochondrial calcium uniporter                                                                                       | 1,35 | 2,11 | FAIL |
| IARS1    | P41252     | isoleucyl-tRNA synthetase 1                                                                                           | 1,35 | 1,88 | FAIL |
| RFC2     | P35250     | replication factor C subunit 2                                                                                        | 1,35 | 3,92 | FAIL |
| REPS1    | Q96D71     | RALBP1 associated Eps domain containing 1                                                                             | 1,35 | 1,44 | FAIL |
| PNKD     | Q8N490     | PNKD metallo-beta-lactamase domain containing                                                                         | 1,35 | 1,39 | FAIL |
| HADHA    | H0YFD6     | hydroxyacyl-CoA dehydrogenase trifunctional multien-<br>zyme complex subunit alpha                                    | 1,35 | 2,50 | FAIL |
| MYH9     | P35579     | myosin heavy chain 9                                                                                                  | 1,35 | 1,96 | FAIL |
| DIS3     | Q9Y2L1     | DIS3 homolog, exosome endoribonuclease and 3'-5' exo-<br>ribonuclease                                                 | 1,35 | 1,32 | FAIL |
| NTPCR    | Q5TDF0     | nucleoside-triphosphatase, cancer-related                                                                             | 1,35 | 3,20 | FAIL |
| CLPP     | Q16740     | caseinolytic mitochondrial matrix peptidase proteolytic<br>subunit                                                    | 1,35 | 2,68 | FAIL |
| MUL1     | Q969V5     | mitochondrial E3 ubiquitin protein ligase 1                                                                           | 1,34 | 1,77 | FAIL |



|         |            |                                                            |      |      |      |
|---------|------------|------------------------------------------------------------|------|------|------|
| RPS8    | P62241     | ribosomal protein S8                                       | 1,34 | 2,68 | FAIL |
| FADS1   | A0A0A0MR51 | fatty acid desaturase 1                                    | 1,34 | 3,22 | FAIL |
| NAT10   | Q9H0A0     | N-acetyltransferase 10                                     | 1,34 | 2,29 | FAIL |
| NOP58   | Q9Y2X3     | NOP58 ribonucleoprotein                                    | 1,34 | 2,15 | FAIL |
|         | H0YDQ1     |                                                            | 1,34 | 2,77 | FAIL |
| MRPS5   | P82675     | mitochondrial ribosomal protein S5                         | 1,34 | 2,46 | FAIL |
| VWF     | P04275     | von Willebrand factor                                      | 1,34 | 1,61 | FAIL |
| TOX4    | O94842     | TOX high mobility group box family member 4                | 1,34 | 2,23 | FAIL |
| UNK     | Q9C0B0     | unk zinc finger                                            | 1,34 | 2,80 | FAIL |
| TTC27   | Q6P3X3     | tetratricopeptide repeat domain 27                         | 1,34 | 1,35 | FAIL |
| PRORP   | O15091     | protein only RNase P catalytic subunit                     | 1,34 | 1,84 | FAIL |
| POU6F2  | P78424     | POU class 6 homeobox 2                                     | 1,34 | 2,36 | FAIL |
| LPCAT3  | Q6P1A2     | lysophosphatidylcholine acyltransferase 3                  | 1,34 | 3,13 | FAIL |
| TOMM7   | Q9P0U1     | translocase of outer mitochondrial membrane 7              | 1,34 | 2,28 | FAIL |
| DOCK5   | Q9H7D0     | dedicator of cytokinesis 5                                 | 1,34 | 2,51 | FAIL |
| CDC45   | O75419     | cell division cycle 45                                     | 1,34 | 2,11 | FAIL |
| NSA2    | A0A0A0MQZ6 | NSA2 ribosome biogenesis factor                            | 1,34 | 2,49 | FAIL |
| VPS35   | Q96QK1     | VPS35 retromer complex component                           | 1,34 | 1,78 | FAIL |
|         | Q5VTU8     |                                                            | 1,34 | 2,57 | FAIL |
| TUBGCP4 | Q9UGJ1     | tubulin gamma complex component 4                          | 1,33 | 1,34 | FAIL |
| GLIPR2  | Q9H4G4     | GLI pathogenesis related 2                                 | 1,33 | 2,37 | FAIL |
| TCF25   | Q9BQ70     | transcription factor 25                                    | 1,33 | 2,39 | FAIL |
| NET1    | Q7Z628     | neuroepithelial cell transforming 1                        | 1,33 | 1,38 | FAIL |
| ZBTB40  | Q9NUA8     | zinc finger and BTB domain containing 40                   | 1,33 | 1,68 | FAIL |
| MAZ     | H3BQI4     | MYC associated zinc finger protein                         | 1,33 | 1,39 | FAIL |
| RPL30   | P62888     | ribosomal protein L30                                      | 1,33 | 1,69 | FAIL |
| FAM120C | Q9NX05     | family with sequence similarity 120 member C               | 1,33 | 2,73 | FAIL |
| EZH2    | Q15910     | enhancer of zeste 2 polycomb repressive complex 2 sub-unit | 1,33 | 3,01 | FAIL |
| ABHD17B | Q5VST6     | abhydrolase domain containing 17B, depalmitoylase          | 1,33 | 2,52 | FAIL |
| ATP5F1C | P36542     | ATP synthase F1 subunit gamma                              | 1,32 | 1,99 | FAIL |
| ITPKB   | P27987     | inositol-trisphosphate 3-kinase B                          | 1,32 | 2,37 | FAIL |
| GEMIN2  | G5EA29     | gem nuclear organelle associated protein 2                 | 1,32 | 3,03 | FAIL |
| UCHL3   | P15374     | ubiquitin C-terminal hydrolase L3                          | 1,32 | 1,48 | FAIL |
|         | A0A087WYN9 |                                                            | 1,32 | 2,14 | FAIL |
| SDAD1   | Q9NVU7     | SDA1 domain containing 1                                   | 1,32 | 3,39 | FAIL |
| VPS26A  | O75436     | VPS26 retromer complex component A                         | 1,32 | 1,45 | FAIL |
| POM121  | Q96HA1     | POM121 transmembrane nucleoporin                           | 1,32 | 1,38 | FAIL |
| NUP85   | Q9BW27     | nucleoporin 85                                             | 1,32 | 2,47 | FAIL |
| ACAD9   | Q9H845     | acyl-CoA dehydrogenase family member 9                     | 1,32 | 1,45 | FAIL |
| MAP2K7  | O14733     | mitogen-activated protein kinase kinase 7                  | 1,32 | 2,07 | FAIL |
| TRIM28  | Q13263     | tripartite motif containing 28                             | 1,32 | 1,44 | FAIL |
| LARP4B  | Q92615     | La ribonucleoprotein 4B                                    | 1,32 | 1,69 | FAIL |
| ACAD8   | Q9UKU7     | acyl-CoA dehydrogenase family member 8                     | 1,32 | 2,94 | FAIL |
| DIMT1   | Q9UNQ2     | DIM1 rRNA methyltransferase and ribosome maturation factor | 1,32 | 2,27 | FAIL |

|         |        |                                                                  |      |      |      |
|---------|--------|------------------------------------------------------------------|------|------|------|
| SERBP1  | Q8NC51 | SERPINE1 mRNA binding protein 1                                  | 1,32 | 1,84 | FAIL |
| RIOK1   | Q9BRS2 | RIO kinase 1                                                     | 1,32 | 1,74 | FAIL |
| RAB24   | F8W8H5 | RAB24, member RAS oncogene family                                | 1,32 | 1,38 | FAIL |
| DPM1    | H0Y368 | dolichyl-phosphate mannosyltransferase subunit 1, catalytic      | 1,32 | 3,12 | FAIL |
| RPP30   | Q5VU11 | ribonuclease P/MRP subunit p30                                   | 1,31 | 1,30 | FAIL |
| TERF1   | P54274 | telomeric repeat binding factor 1                                | 1,31 | 1,82 | FAIL |
| RPS23   | P62266 | ribosomal protein S23                                            | 1,31 | 1,47 | FAIL |
| SLC25A5 | P05141 | solute carrier family 25 member 5                                | 1,31 | 2,89 | FAIL |
| DPY30   | Q9C005 | dpy-30 histone methyltransferase complex regulatory subunit      | 1,31 | 2,03 | FAIL |
| MRT04   | Q9UKD2 | MRT4 homolog, ribosome maturation factor                         | 1,31 | 2,96 | FAIL |
| LAP3    | P28838 | leucine aminopeptidase 3                                         | 1,31 | 2,75 | FAIL |
| AEBP2   | Q6ZN18 | AE binding protein 2                                             | 1,31 | 2,87 | FAIL |
| ESCO2   | Q56NI9 | establishment of sister chromatid cohesion N-acetyltransferase 2 | 1,31 | 1,37 | FAIL |
| SLC39A7 | A2AAT0 | solute carrier family 39 member 7                                | 1,31 | 1,32 | FAIL |
| MBD3    | O95983 | methyl-CpG binding domain protein 3                              | 1,31 | 3,50 | FAIL |
| CFAP20  | Q9Y6A4 | cilia and flagella associated protein 20                         | 1,30 | 1,61 | FAIL |
| TENT2   | Q6PIY7 | terminal nucleotidyltransferase 2                                | 1,30 | 1,87 | FAIL |
| DHX9    | Q08211 | DExH-box helicase 9                                              | 1,30 | 2,13 | FAIL |
| EMG1    | Q92979 | EMG1 N1-specific pseudouridine methyltransferase                 | 1,30 | 2,53 | FAIL |
| GPI     | P06744 | glucose-6-phosphate isomerase                                    | 1,30 | 2,86 | FAIL |
| DHX36   | Q9H2U1 | DEAH-box helicase 36                                             | 1,30 | 2,03 | FAIL |
| SENP3   | Q9H4L4 | SUMO specific peptidase 3                                        | 1,30 | 1,33 | FAIL |
| MYO1C   | O00159 | myosin IC                                                        | 1,30 | 1,49 | FAIL |
| NKRF    | O15226 | NFKB repressing factor                                           | 1,30 | 2,62 | FAIL |
| ABCF1   | Q8NE71 | ATP binding cassette subfamily F member 1                        | 1,30 | 4,14 | FAIL |
| PHF2    | O75151 | PHD finger protein 2                                             | 1,30 | 2,09 | FAIL |
| ZNF446  | Q9NWS9 | zinc finger protein 446                                          | 1,30 | 1,85 | FAIL |
| DDX1    | Q92499 | DEAD-box helicase 1                                              | 1,30 | 3,76 | FAIL |
| CYTH1   | K7ENQ8 | cytohesin 1                                                      | 1,29 | 1,73 | FAIL |
| NECTIN1 | Q15223 | nectin cell adhesion molecule 1                                  | 1,29 | 2,80 | FAIL |
| ARMC6   | Q6NXE6 | armadillo repeat containing 6                                    | 1,29 | 1,72 | FAIL |
| TUBGCP3 | Q96CW5 | tubulin gamma complex component 3                                | 1,29 | 2,74 | FAIL |
| PDS5B   | A9IYQ1 | PDS5 cohesin associated factor B                                 | 1,29 | 1,68 | FAIL |
| PTCD3   | Q96EY7 | pentatricopeptide repeat domain 3                                | 1,29 | 3,09 | FAIL |
| RARS1   | P54136 | arginyl-tRNA synthetase 1                                        | 1,29 | 3,85 | FAIL |
| DNAJB1  | P25685 | DnaJ heat shock protein family (Hsp40) member B1                 | 1,29 | 1,99 | FAIL |
| DDX19A  | I3L0H8 | DEAD-box helicase 19A                                            | 1,29 | 2,65 | FAIL |
| NAMPT   | P43490 | nicotinamide phosphoribosyltransferase                           | 1,29 | 1,99 | FAIL |
| COPS4   | D6RAX7 | COP9 signalosome subunit 4                                       | 1,28 | 2,05 | FAIL |
| LBR     | Q14739 | lamin B receptor                                                 | 1,28 | 3,06 | FAIL |
| GLRX    | P35754 | glutaredoxin                                                     | 1,28 | 1,31 | FAIL |
| CHAF1B  | Q13112 | chromatin assembly factor 1 subunit B                            | 1,28 | 2,56 | FAIL |

|         |            |                                                             |      |      |      |
|---------|------------|-------------------------------------------------------------|------|------|------|
| ELMO2   | Q5JVZ5     | engulfment and cell motility 2                              | 1,28 | 1,34 | FAIL |
| CIAO1   | O76071     | cytosolic iron-sulfur assembly component 1                  | 1,28 | 1,45 | FAIL |
| RFC5    | P40937     | replication factor C subunit 5                              | 1,28 | 2,58 | FAIL |
| NOC3L   | Q8WTT2     | NOC3 like DNA replication regulator                         | 1,28 | 1,88 | FAIL |
| EIF3E   | P60228     | eukaryotic translation initiation factor 3 subunit E        | 1,28 | 2,61 | FAIL |
| PAXBP1  | Q9Y5B6     | PAX3 and PAX7 binding protein 1                             | 1,28 | 1,63 | FAIL |
| IDH3A   | P50213     | isocitrate dehydrogenase (NAD(+)) 3 catalytic subunit alpha | 1,28 | 3,29 | FAIL |
| WDR76   | Q9H967     | WD repeat domain 76                                         | 1,28 | 2,50 | FAIL |
| GFM1    | C9IZ01     | G elongation factor mitochondrial 1                         | 1,28 | 1,54 | FAIL |
| EIF5B   | O60841     | eukaryotic translation initiation factor 5B                 | 1,28 | 2,38 | FAIL |
| RPL22   | K7ERI7     | ribosomal protein L22                                       | 1,28 | 2,63 | FAIL |
| MARK2   | E9PC69     | microtubule affinity regulating kinase 2                    | 1,27 | 2,25 | FAIL |
| FAM76A  | B1AJQ5     | family with sequence similarity 76 member A                 | 1,27 | 1,77 | FAIL |
| BZW1    | Q7L1Q6     | basic leucine zipper and W2 domains 1                       | 1,27 | 2,03 | FAIL |
| PIGT    | A0A1W2PNP0 | phosphatidylinositol glycan anchor biosynthesis class T     | 1,27 | 2,21 | FAIL |
| SSB     | P05455     | small RNA binding exonuclease protection factor La          | 1,27 | 1,52 | FAIL |
| CYB5R1  | Q9UHQ9     | cytochrome b5 reductase 1                                   | 1,27 | 1,67 | FAIL |
| DGKA    | P23743     | diacylglycerol kinase alpha                                 | 1,27 | 2,10 | FAIL |
| USP42   | Q9H9J4     | ubiquitin specific peptidase 42                             | 1,27 | 2,52 | FAIL |
| PHF5A   | Q7RTV0     | PHD finger protein 5A                                       | 1,27 | 1,70 | FAIL |
| WDR62   | O43379     | WD repeat domain 62                                         | 1,27 | 2,71 | FAIL |
| FAM76B  | Q5HYJ3     | family with sequence similarity 76 member B                 | 1,27 | 2,44 | FAIL |
| RUNX1   | Q01196     | RUNX family transcription factor 1                          | 1,27 | 2,45 | FAIL |
| SNX17   | Q15036     | sorting nexin 17                                            | 1,27 | 1,62 | FAIL |
| GNG2    | P59768     | G protein subunit gamma 2                                   | 1,26 | 2,48 | FAIL |
| PRPS1   | B1ALA9     | phosphoribosyl pyrophosphate synthetase 1                   | 1,26 | 2,89 | FAIL |
| INTS7   | Q9NVH2     | integrator complex subunit 7                                | 1,26 | 3,43 | FAIL |
| SACS    | Q9NZJ4     | sacsin molecular chaperone                                  | 1,26 | 2,15 | FAIL |
| RPN1    | P04843     | ribophorin I                                                | 1,26 | 2,22 | FAIL |
| FKBP4   | Q02790     | FKBP prolyl isomerase 4                                     | 1,26 | 2,65 | FAIL |
| CDCA8   | Q53HL2     | cell division cycle associated 8                            | 1,26 | 2,05 | FAIL |
| PHB2    | Q99623     | prohibitin 2                                                | 1,25 | 3,46 | FAIL |
| CCNT1   | O60563     | cyclin T1                                                   | 1,25 | 1,60 | FAIL |
| EEFSEC  | P57772     | eukaryotic elongation factor, selenocysteine-tRNA specific  | 1,25 | 1,93 | FAIL |
| DNMT1   | P26358     | DNA methyltransferase 1                                     | 1,25 | 2,01 | FAIL |
| PRPF40A | H0YG38     | pre-mRNA processing factor 40 homolog A                     | 1,25 | 1,38 | FAIL |
| CDK12   | Q9NYV4     | cyclin dependent kinase 12                                  | 1,25 | 1,69 | FAIL |
| MRPS15  | P82914     | mitochondrial ribosomal protein S15                         | 1,25 | 1,88 | FAIL |
| ACTR2   | P61160     | actin related protein 2                                     | 1,25 | 2,17 | FAIL |
| A2ML1   | A8K2U0     | alpha-2-macroglobulin like 1                                | 1,25 | 1,70 | FAIL |
| GTPBP4  | Q9BZE4     | GTP binding protein 4                                       | 1,25 | 2,02 | FAIL |
| AP1M1   | Q9BXS5     | adaptor related protein complex 1 subunit mu 1              | 1,25 | 1,65 | FAIL |
| URB2    | Q14146     | URB2 ribosome biogenesis homolog                            | 1,24 | 3,08 | FAIL |
| SP2     | Q02086     | Sp2 transcription factor                                    | 1,24 | 3,24 | FAIL |
| CHCHD6  | J3QTA6     | coiled-coil-helix-coiled-coil-helix domain containing 6     | 1,24 | 2,37 | FAIL |

|         |            |                                                             |      |      |      |
|---------|------------|-------------------------------------------------------------|------|------|------|
| IARS2   | Q9NSE4     | isoleucyl-tRNA synthetase 2, mitochondrial                  | 1,24 | 1,57 | FAIL |
| AP3B1   | O00203     | adaptor related protein complex 3 subunit beta 1            | 1,24 | 3,17 | FAIL |
| AP3D1   | O14617     | adaptor related protein complex 3 subunit delta 1           | 1,24 | 2,56 | FAIL |
| ACO1    | P21399     | aconitase 1                                                 | 1,24 | 1,65 | FAIL |
| XRN2    | Q9H0D6     | 5'-3' exoribonuclease 2                                     | 1,24 | 1,84 | FAIL |
| PUM3    | Q15397     | pumilio RNA binding family member 3                         | 1,24 | 1,63 | FAIL |
| HNRNPU  | Q00839     | heterogeneous nuclear ribonucleoprotein U                   | 1,23 | 4,53 | FAIL |
| NDUFA5  | Q16718     | NADH:ubiquinone oxidoreductase subunit A5                   | 1,23 | 2,37 | FAIL |
| TKT     | P29401     | transketolase                                               | 1,23 | 3,51 | FAIL |
| BDH1    | Q02338     | 3-hydroxybutyrate dehydrogenase 1                           | 1,23 | 1,95 | FAIL |
| PKM     | P14618     | pyruvate kinase M1/2                                        | 1,23 | 2,04 | FAIL |
| PDIA6   | Q15084     | protein disulfide isomerase family A member 6               | 1,23 | 1,49 | FAIL |
| AP3S1   | Q92572     | adaptor related protein complex 3 subunit sigma 1           | 1,23 | 2,34 | FAIL |
| MTCL1   | Q9Y4B5     | microtubule crosslinking factor 1                           | 1,23 | 1,41 | FAIL |
| XAB2    | Q9HCS7     | XPA binding protein 2                                       | 1,23 | 1,81 | FAIL |
| GPAT4   | Q86UL3     | glycerol-3-phosphate acyltransferase 4                      | 1,23 | 1,42 | FAIL |
|         | A0A140TA45 |                                                             | 1,23 | 2,23 | FAIL |
| PSMC6   | A0A087X2I1 | proteasome 26S subunit, ATPase 6                            | 1,23 | 2,08 | FAIL |
| U2SURP  | O15042     | U2 snRNP associated SURP domain containing                  | 1,23 | 2,86 | FAIL |
| GTF2H2  | Q13888     | general transcription factor IIH subunit 2                  | 1,23 | 2,54 | FAIL |
| UQCRC2  | P22695     | ubiquinol-cytochrome c reductase core protein 2             | 1,23 | 2,84 | FAIL |
| PDS5B   | Q9NTI5     | PDS5 cohesin associated factor B                            | 1,22 | 2,09 | FAIL |
| BRI3BP  | Q8WY22     | BRI3 binding protein                                        | 1,22 | 1,79 | FAIL |
| DHCR7   | Q9UBM7     | 7-dehydrocholesterol reductase                              | 1,22 | 2,70 | FAIL |
| MRI1    | Q9BV20     | methylthioribose-1-phosphate isomerase 1                    | 1,22 | 2,43 | FAIL |
| SELPLG  | Q14242     | selectin P ligand                                           | 1,22 | 1,72 | FAIL |
| ME2     | P23368     | malic enzyme 2                                              | 1,22 | 2,67 | FAIL |
| MLH1    | A0A669KAW3 | mutL homolog 1                                              | 1,22 | 3,02 | FAIL |
| RBM48   | Q5RL73     | RNA binding motif protein 48                                | 1,22 | 1,38 | FAIL |
| RPS2    | P15880     | ribosomal protein S2                                        | 1,22 | 2,04 | FAIL |
| RPL35A  | P18077     | ribosomal protein L35a                                      | 1,21 | 2,23 | FAIL |
| SF3B2   | Q13435     | splicing factor 3b subunit 2                                | 1,21 | 1,49 | FAIL |
| SAE1    | Q9UBE0     | SUMO1 activating enzyme subunit 1                           | 1,21 | 3,55 | FAIL |
| DBR1    | Q9UK59     | debranching RNA lariats 1                                   | 1,21 | 1,89 | FAIL |
| GTF2H4  | Q92759     | general transcription factor IIH subunit 4                  | 1,21 | 2,23 | FAIL |
| NTHL1   | P78549     | nth like DNA glycosylase 1                                  | 1,21 | 1,74 | FAIL |
| ZNF275  | A6NFS0     | zinc finger protein 275                                     | 1,21 | 2,44 | FAIL |
| DHX37   | Q8IY37     | DEAH-box helicase 37                                        | 1,20 | 2,21 | FAIL |
| PRDX3   | P30048     | peroxiredoxin 3                                             | 1,20 | 2,80 | FAIL |
|         | A0A0B4J1R3 |                                                             | 1,20 | 2,06 | FAIL |
| AGL     | P35573     | amylase, alpha-1, 6-glucosidase, 4-alpha-glucanotransferase | 1,20 | 1,40 | FAIL |
| CCDC47  | Q96A33     | coiled-coil domain containing 47                            | 1,20 | 2,17 | FAIL |
| AIFM1   | O95831     | apoptosis inducing factor mitochondria associated 1         | 1,20 | 2,20 | FAIL |
| NDUFA10 | O95299     | NADH:ubiquinone oxidoreductase subunit A10                  | 1,20 | 1,83 | FAIL |
| NSF     | P46459     | N-ethylmaleimide sensitive factor, vesicle fusing ATPase    | 1,20 | 2,08 | FAIL |
| DDX52   | Q9Y2R4     | DEAD-box helicase 52                                        | 1,20 | 1,64 | FAIL |

|          |            |                                                         |      |      |      |
|----------|------------|---------------------------------------------------------|------|------|------|
| PHF6     | A0A0D9SGE8 | PHD finger protein 6                                    | 1,20 | 1,99 | FAIL |
| ELAVL1   | Q15717     | ELAV like RNA binding protein 1                         | 1,20 | 1,44 | FAIL |
| TMEM30A  | A0A669KBF5 | transmembrane protein 30A                               | 1,20 | 1,82 | FAIL |
| PSMD3    | O43242     | proteasome 26S subunit, non-ATPase 3                    | 1,20 | 2,88 | FAIL |
| EIF2S2   | P20042     | eukaryotic translation initiation factor 2 subunit beta | 1,19 | 3,38 | FAIL |
| SEC24C   | P53992     | SEC24 homolog C, COPII coat complex component           | 1,19 | 2,57 | FAIL |
| RRP8     | O43159     | ribosomal RNA processing 8                              | 1,19 | 2,21 | FAIL |
| NUP153   | P49790     | nucleoporin 153                                         | 1,19 | 1,92 | FAIL |
| HIRIP3   | Q9BW71     | HIRA interacting protein 3                              | 1,19 | 3,06 | FAIL |
| TMEM214  | Q6NUQ4     | transmembrane protein 214                               | 1,19 | 2,58 | FAIL |
| CLIC4    | Q9Y696     | chloride intracellular channel 4                        | 1,19 | 1,79 | FAIL |
| SF3A2    | Q15428     | splicing factor 3a subunit 2                            | 1,19 | 2,54 | FAIL |
| EBNA1BP2 | Q99848     | EBNA1 binding protein 2                                 | 1,19 | 1,90 | FAIL |
| UGP2     | E7EUC7     | UDP-glucose pyrophosphorylase 2                         | 1,19 | 2,73 | FAIL |
| RBM33    | Q96EV2     | RNA binding motif protein 33                            | 1,19 | 1,69 | FAIL |
| COQ5     | Q5HYK3     | coenzyme Q5, methyltransferase                          | 1,19 | 2,23 | FAIL |
| STAU2    | E7EVJ4     | staufen double-stranded RNA binding protein 2           | 1,19 | 2,19 | FAIL |
| TP53RK   | Q96S44     | TP53 regulating kinase                                  | 1,19 | 3,06 | FAIL |
| MCM6     | Q14566     | minichromosome maintenance complex component 6          | 1,19 | 3,55 | FAIL |
| RSL1D1   | O76021     | ribosomal L1 domain containing 1                        | 1,19 | 2,66 | FAIL |
| CBFB     | Q13951     | core-binding factor subunit beta                        | 1,18 | 1,50 | FAIL |
| EIF2D    | P41214     | eukaryotic translation initiation factor 2D             | 1,18 | 1,95 | FAIL |
| ARFRP1   | Q13795     | ADP ribosylation factor related protein 1               | 1,18 | 1,96 | FAIL |
| PELO     | Q9BRX2     | pelota mRNA surveillance and ribosome rescue factor     | 1,18 | 1,98 | FAIL |
| PITHD1   | Q9GZP4     | PITH domain containing 1                                | 1,18 | 2,51 | FAIL |
| GNG5     | P63218     | G protein subunit gamma 5                               | 1,18 | 2,64 | FAIL |
| LYAR     | Q9NX58     | Ly1 antibody reactive                                   | 1,18 | 1,98 | FAIL |
| ETFA     | H0YK49     | electron transfer flavoprotein subunit alpha            | 1,18 | 3,07 | FAIL |
| AKAP8L   | Q9ULX6     | A-kinase anchoring protein 8 like                       | 1,18 | 2,74 | FAIL |
| ARHGEF2  | V9GYM8     | Rho/Rac guanine nucleotide exchange factor 2            | 1,18 | 2,76 | FAIL |
| NUDT5    | A6NFX8     | nudix hydrolase 5                                       | 1,17 | 2,77 | FAIL |
| ATAD1    | Q8NBU5     | ATPase family AAA domain containing 1                   | 1,17 | 1,72 | FAIL |
| ATP5F1A  | P25705     | ATP synthase F1 subunit alpha                           | 1,17 | 3,89 | FAIL |
| TMEM245  | Q9H330     | transmembrane protein 245                               | 1,17 | 1,84 | FAIL |
| TTC14    | Q96N46     | tetratricopeptide repeat domain 14                      | 1,17 | 1,39 | FAIL |
| SUN2     | Q9UH99     | Sad1 and UNC84 domain containing 2                      | 1,17 | 1,78 | FAIL |
| RPL6     | Q02878     | ribosomal protein L6                                    | 1,16 | 2,26 | FAIL |
| PUM1     | Q5T1Z8     | pumilio RNA binding family member 1                     | 1,16 | 3,16 | FAIL |
| APOO     | G3V1B6     | apolipoprotein O                                        | 1,16 | 1,72 | FAIL |
| DNAH5    | Q8TE73     | dynein axonemal heavy chain 5                           | 1,16 | 2,58 | FAIL |
| UBR1     | Q8IWV7     | ubiquitin protein ligase E3 component n-recognin 1      | 1,16 | 2,08 | FAIL |
| REXO4    | Q9GZR2     | REX4 homolog, 3'-5' exonuclease                         | 1,16 | 3,30 | FAIL |
| SRSF5    | Q13243     | serine and arginine rich splicing factor 5              | 1,16 | 1,67 | FAIL |
| AGPS     | O00116     | alkylglycerone phosphate synthase                       | 1,16 | 1,55 | FAIL |
| MRPL37   | Q9BZE1     | mitochondrial ribosomal protein L37                     | 1,16 | 2,20 | FAIL |
| PPIH     | C9JQD4     | peptidylprolyl isomerase H                              | 1,16 | 3,10 | FAIL |
| TFAM     | Q00059     | transcription factor A, mitochondrial                   | 1,16 | 1,76 | FAIL |
| RACK1    | P63244     | receptor for activated C kinase 1                       | 1,16 | 3,12 | FAIL |

|          |            |                                                       |      |      |      |
|----------|------------|-------------------------------------------------------|------|------|------|
| GPAT3    | Q53EU6     | glycerol-3-phosphate acyltransferase 3                | 1,16 | 1,40 | FAIL |
| RABL3    | Q5HYI8     | RAB, member of RAS oncogene family like 3             | 1,16 | 1,93 | FAIL |
| MOSPD2   | Q8NHP6     | motile sperm domain containing 2                      | 1,15 | 1,62 | FAIL |
| TYK2     | E9PM19     | tyrosine kinase 2                                     | 1,15 | 3,72 | FAIL |
| FARSA    | K7ER00     | phenylalanyl-tRNA synthetase subunit alpha            | 1,15 | 2,47 | FAIL |
| RPS11    | P62280     | ribosomal protein S11                                 | 1,15 | 2,23 | FAIL |
| PRPF6    | O94906     | pre-mRNA processing factor 6                          | 1,15 | 1,92 | FAIL |
| GCAT     | O75600     | glycine C-acetyltransferase                           | 1,15 | 2,56 | FAIL |
| TFIP11   | Q9UBB9     | tuftelin interacting protein 11                       | 1,15 | 2,05 | FAIL |
| TPI1     | P60174     | triosephosphate isomerase 1                           | 1,15 | 2,48 | FAIL |
| VIM      | P08670     | vimentin                                              | 1,15 | 2,13 | FAIL |
| SEC31A   | D6REX3     | SEC31 homolog A, COPII coat complex component         | 1,15 | 2,15 | FAIL |
| RPL18A   | M0R3D6     | ribosomal protein L18a                                | 1,15 | 2,65 | FAIL |
| LYPLA2   | Q5QPQ0     | lysophospholipase 2                                   | 1,14 | 2,40 | FAIL |
| NEK7     | Q8TDX7     | NIMA related kinase 7                                 | 1,14 | 2,88 | FAIL |
| PTBP3    | O95758     | polypyrimidine tract binding protein 3                | 1,14 | 1,57 | FAIL |
| FCF1     | Q9Y324     | FCF1 rRNA-processing protein                          | 1,14 | 2,03 | FAIL |
| RPL12    | P30050     | ribosomal protein L12                                 | 1,14 | 1,87 | FAIL |
| MYEF2    | A0A0A0MQW0 | myelin expression factor 2                            | 1,14 | 2,31 | FAIL |
| TAF5L    | O75529     | TATA-box binding protein associated factor 5 like     | 1,14 | 2,20 | FAIL |
| CCDC83   | Q8IWF9     | coiled-coil domain containing 83                      | 1,13 | 1,57 | FAIL |
| DDX47    | Q9H0S4     | DEAD-box helicase 47                                  | 1,13 | 2,67 | FAIL |
| CAPN1    | P07384     | calpain 1                                             | 1,13 | 2,85 | FAIL |
| PRKCH    | P24723     | protein kinase C eta                                  | 1,13 | 1,39 | FAIL |
| PTRH1    | A0A096LP22 | peptidyl-tRNA hydrolase 1 homolog                     | 1,13 | 1,47 | FAIL |
| TRAF3IP1 | Q8TDR0     | TRAF3 interacting protein 1                           | 1,13 | 1,46 | FAIL |
| PBRM1    | Q86U86     | polybromo 1                                           | 1,13 | 1,81 | FAIL |
| PECAM1   | P16284     | platelet and endothelial cell adhesion molecule 1     | 1,13 | 2,90 | FAIL |
| ORC2     | Q13416     | origin recognition complex subunit 2                  | 1,13 | 1,65 | FAIL |
| RPS3A    | P61247     | ribosomal protein S3A                                 | 1,12 | 3,23 | FAIL |
| GABPA    | Q06546     | GA binding protein transcription factor subunit alpha | 1,12 | 1,66 | FAIL |
| NPEPPS   | E9PLK3     | aminopeptidase puromycin sensitive                    | 1,12 | 2,67 | FAIL |
| ALDH18A1 | P54886     | aldehyde dehydrogenase 18 family member A1            | 1,12 | 3,29 | FAIL |
| NXF1     | Q9UBU9     | nuclear RNA export factor 1                           | 1,12 | 2,97 | FAIL |
| PUM2     | Q8TB72     | pumilio RNA binding family member 2                   | 1,12 | 1,92 | FAIL |
| CDK5RAP2 | Q96SN8     | CDK5 regulatory subunit associated protein 2          | 1,12 | 2,74 | FAIL |
| RPL10    | F8W7C6     | ribosomal protein L10                                 | 1,12 | 2,53 | FAIL |
| DGCR8    | Q8WYQ5     | DGCR8 microprocessor complex subunit                  | 1,12 | 2,07 | FAIL |
| RPL4     | P36578     | ribosomal protein L4                                  | 1,11 | 2,09 | FAIL |
| APC      | P25054     | APC regulator of WNT signaling pathway                | 1,11 | 1,73 | FAIL |
| TINF2    | B4DFJ1     | TERF1 interacting nuclear factor 2                    | 1,11 | 1,72 | FAIL |
| PA2G4    | Q9UQ80     | proliferation-associated 2G4                          | 1,11 | 1,67 | FAIL |
| RPA1     | P27694     | replication protein A1                                | 1,11 | 1,85 | FAIL |
| RPS16    | P62249     | ribosomal protein S16                                 | 1,11 | 1,50 | FAIL |
| TRAPPC10 | P48553     | trafficking protein particle complex subunit 10       | 1,11 | 2,26 | FAIL |
| INTS10   | Q9NVR2     | integrator complex subunit 10                         | 1,11 | 2,48 | FAIL |
| EXOSC4   | Q9NPD3     | exosome component 4                                   | 1,11 | 2,57 | FAIL |

|          |            |                                                                    |      |      |      |
|----------|------------|--------------------------------------------------------------------|------|------|------|
| DEK      | H0Y993     | DEK proto-oncogene                                                 | 1,11 | 2,45 | FAIL |
| NDUFV2   | E7EPT4     | NADH:ubiquinone oxidoreductase core subunit V2                     | 1,10 | 1,49 | FAIL |
| RPL3     | P39023     | ribosomal protein L3                                               | 1,10 | 1,71 | FAIL |
| HTT      | P42858     | huntingtin                                                         | 1,10 | 1,50 | FAIL |
| EIF3D    | O15371     | eukaryotic translation initiation factor 3 subunit D               | 1,10 | 1,53 | FAIL |
| BRD8     | Q9H0E9     | bromodomain containing 8                                           | 1,10 | 1,71 | FAIL |
| RAN      | B5MDF5     | RAN, member RAS oncogene family                                    | 1,10 | 3,24 | FAIL |
| KHDRBS1  | Q07666     | KH RNA binding domain containing, signal transduction associated 1 | 1,10 | 2,52 | FAIL |
| IDH2     | P48735     | isocitrate dehydrogenase (NADP(+)) 2                               | 1,10 | 2,54 | FAIL |
| DAD1     | F5GXX5     | defender against cell death 1                                      | 1,10 | 1,53 | FAIL |
| MYL12B   | O14950     | myosin light chain 12B                                             | 1,10 | 1,68 | FAIL |
| GTPBP2   | Q9BX10     | GTP binding protein 2                                              | 1,10 | 2,18 | FAIL |
| CACNG6   | Q9BXT2     | calcium voltage-gated channel auxiliary subunit gamma 6            | 1,09 | 2,44 | FAIL |
| CDKN2AIP | Q9NXV6     | CDKN2A interacting protein                                         | 1,09 | 2,26 | FAIL |
| IGHMBP2  | P38935     | immunoglobulin mu DNA binding protein 2                            | 1,09 | 1,91 | FAIL |
| MRPS16   | A6ND22     | mitochondrial ribosomal protein S16                                | 1,09 | 1,55 | FAIL |
| RPL34    | P49207     | ribosomal protein L34                                              | 1,09 | 3,28 | FAIL |
| RBM15B   | Q8NDT2     | RNA binding motif protein 15B                                      | 1,08 | 2,30 | FAIL |
| MMAA     | Q8IVH4     | metabolism of cobalamin associated A                               | 1,08 | 1,63 | FAIL |
| CDC42BPA | Q5VT25     | CDC42 binding protein kinase alpha                                 | 1,08 | 1,51 | FAIL |
| ERAL1    | O75616     | Era like 12S mitochondrial rRNA chaperone 1                        | 1,08 | 2,24 | FAIL |
| CNP      | P09543     | 2',3'-cyclic nucleotide 3' phosphodiesterase                       | 1,08 | 2,89 | FAIL |
| CKAP2    | Q8WWK9     | cytoskeleton associated protein 2                                  | 1,08 | 1,71 | FAIL |
| PDK3     | Q15120     | pyruvate dehydrogenase kinase 3                                    | 1,08 | 1,95 | FAIL |
| DKC1     | O60832     | dyskerin pseudouridine synthase 1                                  | 1,08 | 2,15 | FAIL |
| SSR1     | A0A3B3IRT8 | signal sequence receptor subunit 1                                 | 1,08 | 1,76 | FAIL |
| PRPF4    | O43172     | pre-mRNA processing factor 4                                       | 1,08 | 2,00 | FAIL |
| COX7B    | P24311     | cytochrome c oxidase subunit 7B                                    | 1,07 | 1,51 | FAIL |
| NOL6     | Q9H6R4     | nucleolar protein 6                                                | 1,07 | 1,91 | FAIL |
| NDUFS3   | O75489     | NADH:ubiquinone oxidoreductase core subunit S3                     | 1,07 | 2,22 | FAIL |
| PARD3    | Q5VWU8     | par-3 family cell polarity regulator                               | 1,07 | 2,53 | FAIL |
| PPP2CA   | P67775     | protein phosphatase 2 catalytic subunit alpha                      | 1,07 | 4,08 | FAIL |
| HNRNPL   | P14866     | heterogeneous nuclear ribonucleoprotein L                          | 1,07 | 1,66 | FAIL |
| GNL1     | P36915     | G protein nucleolar 1 (putative)                                   | 1,07 | 2,07 | FAIL |
| DTNBP1   | D6RCT8     | dystrobrevin binding protein 1                                     | 1,07 | 1,65 | FAIL |
| SNRNP200 | O75643     | small nuclear ribonucleoprotein U5 subunit 200                     | 1,06 | 2,22 | FAIL |
| HNRNPA0  | Q13151     | heterogeneous nuclear ribonucleoprotein A0                         | 1,06 | 1,79 | FAIL |
| WDR12    | Q9GZL7     | WD repeat domain 12                                                | 1,06 | 1,56 | FAIL |
| TARDBP   | Q13148     | TAR DNA binding protein                                            | 1,06 | 3,55 | FAIL |
|          | A0A5H1ZRP4 |                                                                    | 1,06 | 2,41 | FAIL |
| COX2     | P00403     | cytochrome c oxidase subunit II                                    | 1,06 | 1,37 | FAIL |
| UBIAD1   | Q9Y5Z9     | UbiA prenyltransferase domain containing 1                         | 1,06 | 1,83 | FAIL |
| CYB5R3   | P00387     | cytochrome b5 reductase 3                                          | 1,06 | 2,23 | FAIL |
| SSR4     | P51571     | signal sequence receptor subunit 4                                 | 1,05 | 1,49 | FAIL |

|          |            |                                                               |      |      |      |
|----------|------------|---------------------------------------------------------------|------|------|------|
| LRWD1    | Q9UFC0     | leucine rich repeats and WD repeat domain containing 1        | 1,05 | 2,66 | FAIL |
| NUP35    | Q8NFH5     | nucleoporin 35                                                | 1,05 | 2,28 | FAIL |
| GOSR2    | I3L4Z6     | golgi SNAP receptor complex member 2                          | 1,05 | 2,00 | FAIL |
| CRNKL1   | Q9BZJ0     | crooked neck pre-mRNA splicing factor 1                       | 1,05 | 2,16 | FAIL |
| ESD      | U3KQT1     | esterase D                                                    | 1,05 | 1,36 | FAIL |
| IWS1     | Q96ST2     | interacts with SUPT6H, CTD assembly factor 1                  | 1,05 | 2,98 | FAIL |
| IFI16    | Q16666     | interferon gamma inducible protein 16                         | 1,04 | 3,96 | FAIL |
| REXO2    | H0YGR4     | RNA exonuclease 2                                             | 1,04 | 2,22 | FAIL |
| HELLS    | Q9NRZ9     | helicase, lymphoid specific                                   | 1,04 | 1,67 | FAIL |
| DCAF13   | A0A087X1F8 | DDB1 and CUL4 associated factor 13                            | 1,04 | 1,67 | FAIL |
| PDHB     | P11177     | pyruvate dehydrogenase E1 subunit beta                        | 1,04 | 2,34 | FAIL |
| AHSA1    | O95433     | activator of HSP90 ATPase activity 1                          | 1,04 | 2,17 | FAIL |
| RFC3     | P40938     | replication factor C subunit 3                                | 1,04 | 3,06 | FAIL |
| RPL11    | Q5VVC8     | ribosomal protein L11                                         | 1,04 | 2,52 | FAIL |
| PRKAR1A  | P10644     | protein kinase cAMP-dependent type I regulatory subunit alpha | 1,04 | 2,14 | FAIL |
| PYCR2    | Q96C36     | pyrroline-5-carboxylate reductase 2                           | 1,04 | 1,34 | FAIL |
| PRPF31   | Q8WWY3     | pre-mRNA processing factor 31                                 | 1,04 | 1,93 | FAIL |
| PSMB8    | A0A140T998 | proteasome 20S subunit beta 8                                 | 1,03 | 1,34 | FAIL |
| ZNF32    | P17041     | zinc finger protein 32                                        | 1,03 | 1,84 | FAIL |
| PCF11    | O94913     | PCF11 cleavage and polyadenylation factor subunit             | 1,03 | 1,63 | FAIL |
| RTF1     | Q92541     | RTF1 homolog, Paf1/RNA polymerase II complex component        | 1,03 | 3,37 | FAIL |
| ILF3     | Q12906     | interleukin enhancer binding factor 3                         | 1,03 | 2,20 | FAIL |
| LSM14A   | Q8ND56     | LSM14A mRNA processing body assembly factor                   | 1,03 | 1,37 | FAIL |
| TCF7     | P36402     | transcription factor 7                                        | 1,03 | 1,61 | FAIL |
| RACGAP1  | Q9H0H5     | Rac GTPase activating protein 1                               | 1,03 | 2,85 | FAIL |
| ATXN7L3B | Q96GX2     | ataxin 7 like 3B                                              | 1,02 | 1,48 | FAIL |
| HSP90B1  | P14625     | heat shock protein 90 beta family member 1                    | 1,02 | 1,41 | FAIL |
| ERCC3    | P19447     | ERCC excision repair 3, TFIIH core complex helicase subunit   | 1,02 | 1,88 | FAIL |
| GNB1L    | Q9BYB4     | G protein subunit beta 1 like                                 | 1,02 | 2,00 | FAIL |
| PNN      | Q9H307     | pinin, desmosome associated protein                           | 1,02 | 1,98 | FAIL |
| SNTB2    | Q13425     | syntrophin beta 2                                             | 1,02 | 1,39 | FAIL |
| RPS7     | P62081     | ribosomal protein S7                                          | 1,01 | 2,14 | FAIL |
| PPHLN1   | F8W6A0     | periphilin 1                                                  | 1,01 | 1,81 | FAIL |
| CLIP1    | P30622     | CAP-Gly domain containing linker protein 1                    | 1,01 | 1,96 | FAIL |
| RRP1     | P56182     | ribosomal RNA processing 1                                    | 1,01 | 1,93 | FAIL |
| MTX1     | Q13505     | metaxin 1                                                     | 1,01 | 2,21 | FAIL |
| HNRNPA3  | P51991     | heterogeneous nuclear ribonucleoprotein A3                    | 1,01 | 1,51 | FAIL |
| SNRPA1   | P09661     | small nuclear ribonucleoprotein polypeptide A'                | 1,00 | 1,68 | FAIL |
| SAFB2    | Q14151     | scaffold attachment factor B2                                 | 1,00 | 1,50 | FAIL |
| PNISR    | Q8TF01     | PNN interacting serine and arginine rich protein              | 1,00 | 2,16 | FAIL |
| HSDL2    | Q6YN16     | hydroxysteroid dehydrogenase like 2                           | 1,00 | 1,80 | FAIL |
| SIKE1    | Q9BRV8     | suppressor of IKBKE 1                                         | 1,00 | 2,13 | FAIL |



|          |            |                                                             |      |      |      |
|----------|------------|-------------------------------------------------------------|------|------|------|
| ACAT1    | A0A5F9ZHL1 | acetyl-CoA acetyltransferase 1                              | 1,00 | 1,57 | FAIL |
| PSMA2    | P25787     | proteasome 20S subunit alpha 2                              | 1,00 | 1,94 | FAIL |
| NDUFC2   | E9PRJ5     | NADH:ubiquinone oxidoreductase subunit C2                   | 1,00 | 2,53 | FAIL |
| ATP5PO   | P48047     | ATP synthase peripheral stalk subunit OSCP                  | 1,00 | 1,71 | FAIL |
| PPP2R2D  | Q66LE6     | protein phosphatase 2 regulatory subunit Bdelta             | 1,00 | 2,76 | FAIL |
| HDHD5    | Q9BXW7     | haloacid dehalogenase like hydrolase domain containing 5    | 1,00 | 3,33 | FAIL |
| DPH2     | Q9BQC3     | diphthamide biosynthesis 2                                  | 1,00 | 2,66 | FAIL |
| QARS1    | P47897     | glutamyl-tRNA synthetase 1                                  | 1,00 | 2,46 | FAIL |
| RPS26    | P62854     | ribosomal protein S26                                       | 1,00 | 2,51 | FAIL |
| CDC123   | O75794     | cell division cycle 123                                     | 0,99 | 1,70 | FAIL |
| SNRNP48  | Q6IEG0     | small nuclear ribonucleoprotein U11/U12 subunit 48          | 0,99 | 1,73 | FAIL |
| TRAP1    | Q12931     | TNF receptor associated protein 1                           | 0,99 | 1,92 | FAIL |
| RPL7     | P18124     | ribosomal protein L7                                        | 0,99 | 1,34 | FAIL |
| GSS      | P48637     | glutathione synthetase                                      | 0,99 | 1,89 | FAIL |
| ZBTB11   | O95625     | zinc finger and BTB domain containing 11                    | 0,98 | 1,31 | FAIL |
| ZC3H4    | Q9UPT8     | zinc finger CCCH-type containing 4                          | 0,98 | 1,64 | FAIL |
| KAT7     | O95251     | lysine acetyltransferase 7                                  | 0,98 | 1,57 | FAIL |
| DMAC2    | M0R078     | distal membrane arm assembly component 2                    | 0,98 | 1,62 | FAIL |
| KRT10    | A0A1B0GVI3 | keratin 10                                                  | 0,98 | 1,34 | FAIL |
| NCOA7    | Q8NI08     | nuclear receptor coactivator 7                              | 0,97 | 1,79 | FAIL |
| LGALS3BP | Q08380     | galectin 3 binding protein                                  | 0,97 | 1,59 | FAIL |
| EIF3A    | Q14152     | eukaryotic translation initiation factor 3 subunit A        | 0,97 | 1,39 | FAIL |
| RPL5     | A0A2R8Y6J3 | ribosomal protein L5                                        | 0,97 | 2,97 | FAIL |
| C19orf47 | Q8N9M1     | chromosome 19 open reading frame 47                         | 0,97 | 1,37 | FAIL |
| LAMP2    | P13473     | lysosomal associated membrane protein 2                     | 0,97 | 1,72 | FAIL |
| RPN2     | P04844     | ribophorin II                                               | 0,97 | 1,83 | FAIL |
| LTV1     | Q96GA3     | LTV1 ribosome biogenesis factor                             | 0,97 | 1,70 | FAIL |
| RPS25    | P62851     | ribosomal protein S25                                       | 0,97 | 2,26 | FAIL |
| ATP6V1G1 | O75348     | ATPase H+ transporting V1 subunit G1                        | 0,97 | 1,34 | FAIL |
| NOP2     | P46087     | NOP2 nucleolar protein                                      | 0,96 | 2,22 | FAIL |
| NUP160   | Q12769     | nucleoporin 160                                             | 0,96 | 1,67 | FAIL |
| HNRNPH1  | P31943     | heterogeneous nuclear ribonucleoprotein H1                  | 0,96 | 1,61 | FAIL |
| SREK1    | A0A087WY03 | splicing regulatory glutamic acid and lysine rich protein 1 | 0,96 | 3,10 | FAIL |
| DNAJA2   | O60884     | DnaJ heat shock protein family (Hsp40) member A2            | 0,96 | 1,94 | FAIL |
| RBBP6    | Q7Z6E9     | RB binding protein 6, ubiquitin ligase                      | 0,96 | 1,92 | FAIL |
| CEP97    | Q8IW35     | centrosomal protein 97                                      | 0,95 | 1,64 | FAIL |
| KPNA6    | O60684     | karyopherin subunit alpha 6                                 | 0,95 | 1,52 | FAIL |
| SPEG     | Q15772     | striated muscle enriched protein kinase                     | 0,95 | 1,80 | FAIL |
| TRMT5    | Q32P41     | tRNA methyltransferase 5                                    | 0,95 | 1,57 | FAIL |
| ATP6V1H  | Q9UII2     | ATPase H+ transporting V1 subunit H                         | 0,95 | 3,47 | FAIL |
| RPS14    | A0A2R8Y811 | ribosomal protein S14                                       | 0,94 | 2,22 | FAIL |
| IRF2BP1  | Q8IU81     | interferon regulatory factor 2 binding protein 1            | 0,94 | 2,15 | FAIL |
| C1orf87  | Q8N0U7     | chromosome 1 open reading frame 87                          | 0,94 | 2,85 | FAIL |
| RUVBL1   | Q9Y265     | RuvB like AAA ATPase 1                                      | 0,94 | 1,72 | FAIL |
| INCENP   | Q9NQS7     | inner centromere protein                                    | 0,94 | 1,98 | FAIL |
| TPX2     | Q9ULW0     | TPX2 microtubule nucleation factor                          | 0,94 | 1,70 | FAIL |

|          |            |                                                                    |      |      |      |
|----------|------------|--------------------------------------------------------------------|------|------|------|
| SHMT2    | P34897     | serine hydroxymethyltransferase 2                                  | 0,94 | 2,17 | FAIL |
| HNRNPM   | A0A087X0X3 | heterogeneous nuclear ribonucleoprotein M                          | 0,94 | 1,77 | FAIL |
| SCAF1    | Q9H7N4     | SR-related CTD associated factor 1                                 | 0,94 | 1,88 | FAIL |
| JAK1     | A0A5F9ZH07 | Janus kinase 1                                                     | 0,94 | 1,37 | FAIL |
| DNAJB12  | Q9NXW2     | DnaJ heat shock protein family (Hsp40) member B12                  | 0,94 | 2,79 | FAIL |
| WDCP     | Q9H6R7     | WD repeat and coiled coil containing                               | 0,94 | 1,50 | FAIL |
| CKAP5    | Q14008     | cytoskeleton associated protein 5                                  | 0,94 | 1,87 | FAIL |
| PFKFB3   | A0A1W2PR17 | 6-phosphofructo-2-kinase/fructose-2,6-biphosphatase 3              | 0,94 | 2,44 | FAIL |
| PNP      | P00491     | purine nucleoside phosphorylase                                    | 0,94 | 3,23 | FAIL |
| MTA2     | O94776     | metastasis associated 1 family member 2                            | 0,93 | 1,67 | FAIL |
| LGALS9   | O00182     | galectin 9                                                         | 0,93 | 2,31 | FAIL |
| OAT      | P04181     | ornithine aminotransferase                                         | 0,93 | 2,02 | FAIL |
|          | D3DQV9     |                                                                    | 0,93 | 1,65 | FAIL |
| PABPN1   | G3V4T2     | poly(A) binding protein nuclear 1                                  | 0,93 | 1,62 | FAIL |
| PAN3     | Q58A45     | poly(A) specific ribonuclease subunit PAN3                         | 0,93 | 2,54 | FAIL |
| GNE      | Q9Y223     | glucosamine (UDP-N-acetyl)-2-epimerase/N-acetyl-mannosamine kinase | 0,92 | 2,16 | FAIL |
| THOC2    | Q8NI27     | THO complex subunit 2                                              | 0,92 | 2,69 | FAIL |
| MCM5     | P33992     | minichromosome maintenance complex component 5                     | 0,91 | 1,46 | FAIL |
| TOMM34   | Q15785     | translocase of outer mitochondrial membrane 34                     | 0,91 | 1,32 | FAIL |
| RPL23    | P62829     | ribosomal protein L23                                              | 0,91 | 2,01 | FAIL |
| VRK1     | Q99986     | VRK serine/threonine kinase 1                                      | 0,91 | 2,06 | FAIL |
| SH2B1    | Q9NRF2     | SH2B adaptor protein 1                                             | 0,91 | 1,72 | FAIL |
| FIP1L1   | Q6UN15     | factor interacting with PAPOLA and CPSF1                           | 0,91 | 2,59 | FAIL |
| ARHGAP45 | Q92619     | Rho GTPase activating protein 45                                   | 0,91 | 2,35 | FAIL |
| SYAP1    | Q96A49     | synapse associated protein 1                                       | 0,91 | 1,50 | FAIL |
| RPS10    | P46783     | ribosomal protein S10                                              | 0,91 | 2,17 | FAIL |
| KRR1     | Q13601     | KRR1 small subunit processome component homolog                    | 0,91 | 3,05 | FAIL |
| DHRS1    | Q96LJ7     | dehydrogenase/reductase 1                                          | 0,90 | 1,39 | FAIL |
| MTFMT    | Q96DP5     | mitochondrial methionyl-tRNA formyltransferase                     | 0,90 | 1,32 | FAIL |
| IKZF1    | Q13422     | IKAROS family zinc finger 1                                        | 0,90 | 2,55 | FAIL |
| THOC7    | Q6I9Y2     | THO complex subunit 7                                              | 0,90 | 1,36 | FAIL |
| RPL29    | A0A3B3ITT5 | ribosomal protein L29                                              | 0,90 | 3,22 | FAIL |
| AHNAK    | Q09666     | AHNAK nucleoprotein                                                | 0,90 | 3,23 | FAIL |
| DCTN5    | H3BUD2     | dynactin subunit 5                                                 | 0,90 | 2,49 | FAIL |
| GPKOW    | Q92917     | G-patch domain and KOW motifs                                      | 0,90 | 2,48 | FAIL |
| YY1      | P25490     | YY1 transcription factor                                           | 0,89 | 1,41 | FAIL |
| KIFC1    | Q9BW19     | kinesin family member C1                                           | 0,89 | 1,44 | FAIL |
| MOV10    | Q9HCE1     | Mov10 RNA helicase                                                 | 0,89 | 4,13 | FAIL |
| HSPD1    | P10809     | heat shock protein family D (Hsp60) member 1                       | 0,89 | 1,58 | FAIL |
| STRBP    | Q96SI9     | spermatid perinuclear RNA binding protein                          | 0,89 | 2,33 | FAIL |
| NUDT3    | O95989     | nudix hydrolase 3                                                  | 0,89 | 1,33 | FAIL |
| HDGFL2   | Q7Z4V5     | HDGF like 2                                                        | 0,88 | 1,53 | FAIL |
| ETF1     | B7Z7P8     | eukaryotic translation termination factor 1                        | 0,88 | 2,17 | FAIL |
| ERP29    | F8VY02     | endoplasmic reticulum protein 29                                   | 0,88 | 1,31 | FAIL |
| SPOUT1   | Q5T280     | SPOUT domain containing methyltransferase 1                        | 0,88 | 3,02 | FAIL |
| CLK3     | P49761     | CDC like kinase 3                                                  | 0,87 | 2,79 | FAIL |

|             |            |                                                                |      |      |      |
|-------------|------------|----------------------------------------------------------------|------|------|------|
| NSUN2       | Q08J23     | NOP2/Sun RNA methyltransferase 2                               | 0,87 | 1,33 | FAIL |
| RO60        | P10155     | Ro60, Y RNA binding protein                                    | 0,87 | 1,45 | FAIL |
| MSMO1       | Q15800     | methylsterol monooxygenase 1                                   | 0,87 | 2,04 | FAIL |
| TXNDC11     | Q6PKC3     | thioredoxin domain containing 11                               | 0,86 | 2,63 | FAIL |
| H1-5        | P16401     | H1.5 linker histone, cluster member                            | 0,86 | 1,88 | FAIL |
| SURF6       | O75683     | surfeit 6                                                      | 0,86 | 1,69 | FAIL |
| METAP2      | P50579     | methionyl aminopeptidase 2                                     | 0,86 | 1,70 | FAIL |
| N4BP1       | O75113     | NEDD4 binding protein 1                                        | 0,85 | 2,53 | FAIL |
| NHERF4      | E9PPZ1     | NHERF family PDZ scaffold protein 4                            | 0,84 | 1,45 | FAIL |
| STIL        | E9PSF2     | STIL centriolar assembly protein                               | 0,84 | 1,30 | FAIL |
| OCIAD2      | Q56VL3     | OCIA domain containing 2                                       | 0,84 | 2,04 | FAIL |
| RBMX        | P38159     | RNA binding motif protein X-linked                             | 0,84 | 1,40 | FAIL |
| FADS2       | O95864     | fatty acid desaturase 2                                        | 0,84 | 4,30 | FAIL |
|             | H3BR70     |                                                                | 0,84 | 1,89 | FAIL |
| DDX10       | Q13206     | DEAD-box helicase 10                                           | 0,84 | 2,56 | FAIL |
| SRRT        | Q9BXP5     | serrate, RNA effector molecule                                 | 0,83 | 1,39 | FAIL |
|             | A0A0G2JHC2 |                                                                | 0,83 | 1,76 | FAIL |
| MCM3        | P25205     | minichromosome maintenance complex component 3                 | 0,83 | 2,33 | FAIL |
| SLAIN1      | A0A0A0MSS3 | SLAIN motif family member 1                                    | 0,83 | 1,92 | FAIL |
| RPS18       | P62269     | ribosomal protein S18                                          | 0,83 | 1,38 | FAIL |
| UPF2        | Q9HAU5     | UPF2 regulator of nonsense mediated mRNA decay                 | 0,83 | 2,03 | FAIL |
| DHX8        | Q14562     | DEAH-box helicase 8                                            | 0,82 | 2,19 | FAIL |
| PMVK        | Q15126     | phosphomevalonate kinase                                       | 0,82 | 2,11 | FAIL |
| AKAP1       | Q92667     | A-kinase anchoring protein 1                                   | 0,82 | 2,16 | FAIL |
| TMED10      | P49755     | transmembrane p24 trafficking protein 10                       | 0,82 | 1,95 | FAIL |
| CHI3L2      | Q15782     | chitinase 3 like 2                                             | 0,81 | 1,56 | FAIL |
| CDR2        | H3BU23     | cerebellar degeneration related protein 2                      | 0,81 | 1,82 | FAIL |
|             | A0A4V7I447 |                                                                | 0,81 | 1,65 | FAIL |
|             | F8WCL7     |                                                                | 0,80 | 1,56 | FAIL |
| MRPL54      | Q6P161     | mitochondrial ribosomal protein L54                            | 0,80 | 1,95 | FAIL |
| SFSWAP      | Q12872     | splicing factor SWAP                                           | 0,79 | 2,41 | FAIL |
| MYO1G       | B0I1T2     | myosin IG                                                      | 0,79 | 2,14 | FAIL |
| THOC1       | Q96FV9     | THO complex subunit 1                                          | 0,79 | 1,32 | FAIL |
| CDK5        | Q00535     | cyclin dependent kinase 5                                      | 0,79 | 1,46 | FAIL |
| CRYZ        | C9JH92     | crystallin zeta                                                | 0,78 | 1,67 | FAIL |
| EIF6        | P56537     | eukaryotic translation initiation factor 6                     | 0,78 | 1,67 | FAIL |
| HJURP       | C9JWC4     | Holliday junction recognition protein                          | 0,78 | 1,58 | FAIL |
| L2HGDH      | Q9H9P8     | L-2-hydroxyglutarate dehydrogenase                             | 0,77 | 1,85 | FAIL |
| LRCH1       | Q9Y2L9     | leucine rich repeats and calponin homology domain containing 1 | 0,77 | 1,90 | FAIL |
| CORO7-PAM16 | A0A0A6YYL4 | CORO7-PAM16 readthrough                                        | 0,77 | 1,74 | FAIL |
| PAF1        | Q8N7H5     | PAF1 homolog, Paf1/RNA polymerase II complex component         | 0,76 | 1,32 | FAIL |
| SAMD13      | Q5VXD3     | sterile alpha motif domain containing 13                       | 0,76 | 2,51 | FAIL |
| TRAF3IP3    | Q9Y228     | TRAF3 interacting protein 3                                    | 0,75 | 1,56 | FAIL |
|             | B9ZVT1     |                                                                | 0,75 | 1,53 | FAIL |

|           |            |                                                                              |      |      |      |
|-----------|------------|------------------------------------------------------------------------------|------|------|------|
| HELZ      | P42694     | helicase with zinc finger                                                    | 0,74 | 1,82 | FAIL |
| RABGAP1   | Q9Y3P9     | RAB GTPase activating protein 1                                              | 0,74 | 2,30 | FAIL |
| PSMB1     | P20618     | proteasome 20S subunit beta 1                                                | 0,73 | 1,70 | FAIL |
| FDXR      | A0A0A0MT64 | ferredoxin reductase                                                         | 0,73 | 2,35 | FAIL |
| TXNDC5    | Q8NBS9     | thioredoxin domain containing 5                                              | 0,73 | 1,75 | FAIL |
| SNRPD3    | P62318     | small nuclear ribonucleoprotein D3 polypeptide                               | 0,72 | 2,73 | FAIL |
| RPL7L1    | Q6DKI1     | ribosomal protein L7 like 1                                                  | 0,72 | 1,31 | FAIL |
| RAB8A     | P61006     | RAB8A, member RAS oncogene family                                            | 0,72 | 1,48 | FAIL |
| AURKA     | O14965     | aurora kinase A                                                              | 0,72 | 1,37 | FAIL |
| TRAF7     | Q6Q0C0     | TNF receptor associated factor 7                                             | 0,72 | 1,83 | FAIL |
| NSUN4     | Q96CB9     | NOP2/Sun RNA methyltransferase 4                                             | 0,71 | 1,82 | FAIL |
| MCIDAS    | D6RGH6     | multiciliate differentiation and DNA synthesis associated cell cycle protein | 0,70 | 3,39 | FAIL |
| TARBP1    | Q13395     | TAR (HIV-1) RNA binding protein 1                                            | 0,70 | 1,86 | FAIL |
| AVIL      | O75366     | advillin                                                                     | 0,69 | 2,03 | FAIL |
| CEP170B   | Q9Y4F5     | centrosomal protein 170B                                                     | 0,69 | 1,44 | FAIL |
| HNRNPA2B1 | P22626     | heterogeneous nuclear ribonucleoprotein A2/B1                                | 0,69 | 1,49 | FAIL |
| NOL10     | Q9BSC4     | nucleolar protein 10                                                         | 0,69 | 1,45 | FAIL |
| NCL       | P19338     | nucleolin                                                                    | 0,68 | 2,36 | FAIL |
| MRPL14    | Q6PIL8     | mitochondrial ribosomal protein L14                                          | 0,68 | 1,44 | FAIL |
| RSU1      | Q15404     | Ras suppressor protein 1                                                     | 0,67 | 1,74 | FAIL |
| DDX3X     | O00571     | DEAD-box helicase 3 X-linked                                                 | 0,66 | 1,60 | FAIL |
| ZKSCAN1   | P17029     | zinc finger with KRAB and SCAN domains 1                                     | 0,66 | 1,85 | FAIL |
| ACTL6A    | O96019     | actin like 6A                                                                | 0,66 | 1,44 | FAIL |
| FXR1      | B4DXZ6     | FMR1 autosomal homolog 1                                                     | 0,66 | 1,70 | FAIL |
| ZC3H11A   | O75152     | zinc finger CCCH-type containing 11A                                         | 0,65 | 1,55 | FAIL |
| ABCD3     | A0A3B3ITW3 | ATP binding cassette subfamily D member 3                                    | 0,65 | 2,08 | FAIL |
| RBM5      | P52756     | RNA binding motif protein 5                                                  | 0,65 | 1,40 | FAIL |
| NOB1      | Q9ULX3     | NIN1 (RPN12) binding protein 1 homolog                                       | 0,65 | 1,32 | FAIL |
| PRXL2A    | Q9BRX8     | peroxiredoxin like 2A                                                        | 0,65 | 1,56 | FAIL |
| HBA2      | A0A2R8Y7C0 | hemoglobin subunit alpha 2                                                   | 0,65 | 1,79 | FAIL |
| CDC20     | Q12834     | cell division cycle 20                                                       | 0,64 | 1,56 | FAIL |
| COIL      | P38432     | coilin                                                                       | 0,64 | 1,38 | FAIL |
| NCOA5     | Q9HCD5     | nuclear receptor coactivator 5                                               | 0,63 | 2,09 | FAIL |
| RPS4X     | P62701     | ribosomal protein S4 X-linked                                                | 0,63 | 1,56 | FAIL |
| DDX46     | Q7L014     | DEAD-box helicase 46                                                         | 0,62 | 3,86 | FAIL |
| HP1BP3    | Q5SSJ5     | heterochromatin protein 1 binding protein 3                                  | 0,62 | 1,35 | FAIL |
| RPL36     | Q9Y3U8     | ribosomal protein L36                                                        | 0,61 | 1,52 | FAIL |
| MATR3     | A8MXP9     | matrin 3                                                                     | 0,59 | 1,72 | FAIL |
| ZNF24     | P17028     | zinc finger protein 24                                                       | 0,59 | 1,94 | FAIL |
| NMNAT1    | Q9HAN9     | nicotinamide nucleotide adenyltransferase 1                                  | 0,58 | 1,54 | FAIL |
| DNAJC7    | A0A6I8PU73 | DnaJ heat shock protein family (Hsp40) member C7                             | 0,58 | 1,37 | FAIL |
| HLCS      | P50747     | holocarboxylase synthetase                                                   | 0,58 | 2,94 | FAIL |
| TUFM      | P49411     | Tu translation elongation factor, mitochondrial                              | 0,57 | 1,32 | FAIL |
| ABCB7     | A0A087WW65 | ATP binding cassette subfamily B member 7                                    | 0,55 | 2,44 | FAIL |
| CCDC82    | A0A2R8YE98 | coiled-coil domain containing 82                                             | 0,55 | 1,74 | FAIL |
| RPL27A    | E9PLL6     | ribosomal protein L27a                                                       | 0,55 | 1,55 | FAIL |

|          |            |                                                                  |       |      |      |
|----------|------------|------------------------------------------------------------------|-------|------|------|
| GSTK1    | Q9Y2Q3     | glutathione S-transferase kappa 1                                | 0,53  | 1,33 | FAIL |
| RPL26    | P61254     | ribosomal protein L26                                            | 0,53  | 1,35 | FAIL |
| CCDC59   | Q9P031     | coiled-coil domain containing 59                                 | 0,52  | 1,35 | FAIL |
| RPL10A   | P62906     | ribosomal protein L10a                                           | 0,52  | 1,33 | FAIL |
| TAF6L    | Q9Y6J9     | TATA-box binding protein associated factor 6 like                | 0,51  | 2,07 | FAIL |
| NAXE     | Q8NCW5     | NAD(P)HX epimerase                                               | 0,50  | 1,62 | FAIL |
| PRPF4B   | Q13523     | pre-mRNA processing factor 4B                                    | 0,50  | 1,38 | FAIL |
| DECR1    | Q16698     | 2,4-dienoyl-CoA reductase 1                                      | 0,49  | 1,38 | FAIL |
| PLA2G4E  | Q3MJ16     | phospholipase A2 group IVE                                       | 0,49  | 1,57 | FAIL |
| GLS2     | A0A087X004 | glutaminase 2                                                    | 0,47  | 1,38 | FAIL |
| RPL23A   | P62750     | ribosomal protein L23a                                           | 0,46  | 1,63 | FAIL |
| SNRNP70  | P08621     | small nuclear ribonucleoprotein U1 subunit 70                    | 0,45  | 1,32 | FAIL |
| SAPCD2   | Q86UD0     | suppressor APC domain containing 2                               | 0,45  | 1,64 | FAIL |
| CALU     | O43852     | calumenin                                                        | 0,43  | 1,80 | FAIL |
| PUF60    | A0A0J9YVP6 | poly(U) binding splicing factor 60                               | 0,41  | 1,66 | FAIL |
| RBM14    | Q96PK6     | RNA binding motif protein 14                                     | 0,41  | 1,74 | FAIL |
| MPP1     | Q00013     | MAGUK p55 scaffold protein 1                                     | 0,40  | 2,82 | FAIL |
| FLNC     | Q14315     | filamin C                                                        | 0,38  | 1,31 | FAIL |
| UQCC5    | Q8WVI0     | ubiquinol-cytochrome c reductase complex assembly factor 5       | 0,37  | 1,93 | FAIL |
| SART1    | O43290     | spliceosome associated factor 1, recruiter of U4/U6.U5 tri-snRNP | 0,35  | 1,75 | FAIL |
| SGPL1    | O95470     | sphingosine-1-phosphate lyase 1                                  | 0,20  | 1,98 | FAIL |
| RPRD2    | Q5VT52     | regulation of nuclear pre-mRNA domain containing 2               | -0,31 | 1,48 | FAIL |
| RP9      | Q8TA86     | RP9 pre-mRNA splicing factor                                     | -0,47 | 2,01 | FAIL |
| TOM1     | O60784     | target of myb1 membrane trafficking protein                      | -0,49 | 1,43 | FAIL |
| IMPA2    | K7EL65     | inositol monophosphatase 2                                       | -0,50 | 1,76 | FAIL |
| HLTF     | Q14527     | helicase like transcription factor                               | -0,51 | 1,39 | FAIL |
| KRT78    | Q8N1N4     | keratin 78                                                       | -0,52 | 2,71 | FAIL |
| ZRANB2   | O95218     | zinc finger RANBP2-type containing 2                             | -0,56 | 1,97 | FAIL |
| MRPL17   | Q9NRX2     | mitochondrial ribosomal protein L17                              | -0,71 | 1,80 | FAIL |
| MOB3A    | Q96BX8     | MOB kinase activator 3A                                          | -0,73 | 1,64 | FAIL |
| S100A7   | P31151     | S100 calcium binding protein A7                                  | -0,74 | 1,39 | FAIL |
| IL36G    | Q9NZH8     | interleukin 36 gamma                                             | -0,74 | 1,51 | FAIL |
| ARGLU1   | Q9NWB6     | arginine and glutamate rich 1                                    | -0,75 | 2,47 | FAIL |
| ITK      | Q08881     | IL2 inducible T cell kinase                                      | -0,78 | 2,25 | FAIL |
| PHKA1    | A6NMN0     | phosphorylase kinase regulatory subunit alpha 1                  | -0,80 | 1,56 | FAIL |
| SREK1IP1 | Q8N9Q2     | SREK1 interacting protein 1                                      | -0,81 | 1,66 | FAIL |
| SCGB1D2  | O95969     | secretoglobin family 1D member 2                                 | -0,82 | 1,86 | FAIL |
| EEF2     | P13639     | eukaryotic translation elongation factor 2                       | -0,83 | 2,59 | FAIL |
| CD151    | E9PRJ3     | CD151 molecule (Raph blood group)                                | -0,83 | 1,35 | FAIL |
| GSTM1    | E7EWW9     | glutathione S-transferase mu 1                                   | -0,84 | 1,60 | FAIL |
| MED30    | Q96HR3     | mediator complex subunit 30                                      | -0,84 | 1,94 | FAIL |
| ARG1     | P05089     | arginase 1                                                       | -0,87 | 1,73 | FAIL |
| AZGP1    | P25311     | alpha-2-glycoprotein 1, zinc-binding                             | -0,88 | 1,91 | FAIL |
| PKP1     | Q13835     | plakophilin 1                                                    | -0,88 | 1,47 | FAIL |
| DCD      | P81605     | dermcidin                                                        | -0,88 | 2,15 | FAIL |

|           |            |                                                                 |       |      |      |
|-----------|------------|-----------------------------------------------------------------|-------|------|------|
| AKR1B1    | P15121     | aldo-keto reductase family 1 member B                           | -0,89 | 2,11 | FAIL |
|           | A0A087X211 |                                                                 | -0,91 | 3,17 | FAIL |
| MAP4K4    | E7EN19     | mitogen-activated protein kinase kinase kinase 4                | -0,92 | 1,72 | FAIL |
| BRD10     | Q5HYC2     | bromodomain containing 10                                       | -0,93 | 1,66 | FAIL |
| APOD      | C9JF17     | apolipoprotein D                                                | -0,94 | 1,62 | FAIL |
| SRSF9     | Q13242     | serine and arginine rich splicing factor 9                      | -0,94 | 1,46 | FAIL |
| NUP205    | Q92621     | nucleoporin 205                                                 | -0,94 | 1,71 | FAIL |
| KLHDC4    | H3BQH3     | kelch domain containing 4                                       | -0,94 | 2,00 | FAIL |
| RBM17     | Q96125     | RNA binding motif protein 17                                    | -0,98 | 1,48 | FAIL |
| WDR70     | Q9NW82     | WD repeat domain 70                                             | -0,99 | 1,77 | FAIL |
| KRT77     | Q7Z794     | keratin 77                                                      | -1,00 | 1,34 | FAIL |
| MCCC1     | Q96RQ3     | methylcrotonyl-CoA carboxylase subunit 1                        | -1,03 | 1,75 | FAIL |
| PSMB7     | Q99436     | proteasome 20S subunit beta 7                                   | -1,06 | 1,74 | FAIL |
| FNTA      | B3KVN2     | farnesyltransferase, CAAX box, alpha                            | -1,09 | 1,73 | FAIL |
|           | A0A087WZC4 |                                                                 | -1,11 | 1,64 | FAIL |
| SERPINC1  | P01008     | serpin family C member 1                                        | -1,16 | 1,75 | FAIL |
| HERC2     | O95714     | HECT and RLD domain containing E3 ubiquitin protein<br>ligase 2 | -1,17 | 1,45 | FAIL |
| BRD4      | O60885     | bromodomain containing 4                                        | -1,18 | 1,72 | FAIL |
| DNAJB14   | Q8TBM8     | DnaJ heat shock protein family (Hsp40) member B14               | -1,18 | 2,06 | FAIL |
| NCCRP1    | Q6ZVX7     | NCCRP1, F-box associated domain containing                      | -1,18 | 1,87 | FAIL |
| SLC7A1    | P30825     | solute carrier family 7 member 1                                | -1,18 | 1,31 | FAIL |
| KRT1      | P04264     | keratin 1                                                       | -1,19 | 3,06 | FAIL |
| MED12L    | F8WAE6     | mediator complex subunit 12L                                    | -1,19 | 1,57 | FAIL |
| PCCA      | P05165     | propionyl-CoA carboxylase subunit alpha                         | -1,21 | 1,41 | FAIL |
| GPATCH1   | Q9BRR8     | G-patch domain containing 1                                     | -1,21 | 1,92 | FAIL |
| RBBP8     | F6Q6H0     | RB binding protein 8, endonuclease                              | -1,23 | 2,05 | FAIL |
| TP53BP2   | Q13625     | tumor protein p53 binding protein 2                             | -1,26 | 2,47 | FAIL |
| FLG       | P20930     | filaggrin                                                       | -1,30 | 2,08 | FAIL |
| PLEKHO1   | Q53GL0     | pleckstrin homology domain containing O1                        | -1,31 | 2,07 | FAIL |
| S100A14   | Q9HCY8     | S100 calcium binding protein A14                                | -1,33 | 1,87 | FAIL |
| TGM3      | Q08188     | transglutaminase 3                                              | -1,35 | 2,62 | FAIL |
| CDK11B    | P21127     | cyclin dependent kinase 11B                                     | -1,35 | 1,71 | FAIL |
| WDR91     | A4D1P6     | WD repeat domain 91                                             | -1,35 | 2,37 | FAIL |
| ATG5      | A0A2R8Y718 | autophagy related 5                                             | -1,35 | 1,36 | FAIL |
| PCCB      | C9JQS9     | propionyl-CoA carboxylase subunit beta                          | -1,36 | 2,14 | FAIL |
| SERPINB12 | Q96P63     | serpin family B member 12                                       | -1,37 | 2,73 | FAIL |
| GSDMA     | Q96QA5     | gasdermin A                                                     | -1,38 | 2,42 | FAIL |
| DSG1      | Q02413     | desmoglein 1                                                    | -1,38 | 1,70 | FAIL |
| KRT14     | P02533     | keratin 14                                                      | -1,39 | 2,19 | FAIL |
| PIKFYVE   | Q9Y217     | phosphoinositide kinase, FYVE-type zinc finger con-<br>taining  | -1,41 | 1,51 | FAIL |
| MCCC2     | Q9HCC0     | methylcrotonyl-CoA carboxylase subunit 2                        | -1,42 | 1,37 | FAIL |
| PPP6R2    | O75170     | protein phosphatase 6 regulatory subunit 2                      | -1,43 | 2,18 | FAIL |
| PRSS1     | E7EQ64     | serine protease 1                                               | -1,44 | 1,36 | FAIL |
| SCGB2A2   | Q13296     | secretoglobin family 2A member 2                                | -1,46 | 2,68 | FAIL |

|         |            |                                                                            |       |      |      |
|---------|------------|----------------------------------------------------------------------------|-------|------|------|
| GDPD3   | Q7L5L3     | glycerophosphodiester phosphodiesterase domain containing 3                | -1,46 | 1,71 | FAIL |
| GCFC2   | P16383     | GC-rich sequence DNA-binding factor 2                                      | -1,47 | 1,72 | FAIL |
| DCP1A   | Q9NPI6     | decapping mRNA 1A                                                          | -1,47 | 1,32 | FAIL |
| BRCA1   | P38398     | BRCA1 DNA repair associated                                                | -1,49 | 2,47 | FAIL |
| VCL     | P18206     | vinculin                                                                   | -1,49 | 1,41 | FAIL |
| MYH10   | P35580     | myosin heavy chain 10                                                      | -1,53 | 2,07 | FAIL |
| FLII    | Q13045     | FLII actin remodeling protein                                              | -1,54 | 2,26 | FAIL |
| CST4    | P01036     | cystatin S                                                                 | -1,56 | 1,40 | FAIL |
| XPOT    | O43592     | exportin for tRNA                                                          | -1,58 | 1,37 | FAIL |
| S100A16 | Q96FQ6     | S100 calcium binding protein A16                                           | -1,58 | 2,89 | FAIL |
| KRT2    | P35908     | keratin 2                                                                  | -1,59 | 3,37 | FAIL |
| SDR9C7  | Q8NEX9     | short chain dehydrogenase/reductase family 9C member 7                     | -1,60 | 1,62 | FAIL |
| HERC1   | Q15751     | HECT and RLD domain containing E3 ubiquitin protein ligase family member 1 | -1,62 | 1,81 | FAIL |
| SRGAP3  | O43295     | SLIT-ROBO Rho GTPase activating protein 3                                  | -1,62 | 1,49 | FAIL |
| IAH1    | Q2TAA2     | isoamyl acetate hydrolyzing esterase 1 (putative)                          | -1,63 | 1,38 | FAIL |
| PAPOLA  | P51003     | poly(A) polymerase alpha                                                   | -1,63 | 1,43 | FAIL |
| KRT10   | P13645     | keratin 10                                                                 | -1,64 | 2,50 | FAIL |
| KPRP    | Q5T749     | keratinocyte proline rich protein                                          | -1,68 | 1,84 | FAIL |
| NDST4   | Q9H3R1     | N-deacetylase and N-sulfotransferase 4                                     | -1,68 | 2,15 | FAIL |
|         | Q8IZJ6     |                                                                            | -1,68 | 2,15 | FAIL |
| DYNC2H1 | Q8NCM8     | dynein cytoplasmic 2 heavy chain 1                                         | -1,70 | 2,17 | FAIL |
| CHIA    | Q9BZP6     | chitinase acidic                                                           | -1,70 | 1,80 | FAIL |
| PDHA1   | P08559     | pyruvate dehydrogenase E1 subunit alpha 1                                  | -1,70 | 2,48 | FAIL |
| IL20RB  | Q6UXL0     | interleukin 20 receptor subunit beta                                       | -1,72 | 2,53 | FAIL |
| ABI3BP  | Q7Z7G0     | ABI family member 3 binding protein                                        | -1,77 | 1,57 | FAIL |
| ASAP2   | O43150     | ArfGAP with SH3 domain, ankyrin repeat and PH domain 2                     | -1,79 | 2,60 | FAIL |
| FLG2    | Q5D862     | filaggrin 2                                                                | -1,79 | 2,29 | FAIL |
| GGCT    | O75223     | gamma-glutamylcyclotransferase                                             | -1,81 | 3,39 | FAIL |
| CCDC88B | H7BY33     | coiled-coil domain containing 88B                                          | -1,86 | 2,78 | FAIL |
| LACTB   | P83111     | lactamase beta                                                             | -1,88 | 3,20 | FAIL |
| POLD1   | M0R2B7     | DNA polymerase delta 1, catalytic subunit                                  | -1,89 | 4,06 | FAIL |
| KRT17   | Q04695     | keratin 17                                                                 | -1,91 | 3,78 | FAIL |
| ING5    | A0A1B0GW41 | inhibitor of growth family member 5                                        | -1,93 | 1,69 | FAIL |
| OSBPL1A | Q9BXW6     | oxysterol binding protein like 1A                                          | -1,95 | 4,04 | FAIL |
| VPS16   | Q9H269     | VPS16 core subunit of CORVET and HOPS complexes                            | -1,96 | 3,74 | FAIL |
| TGM1    | P22735     | transglutaminase 1                                                         | -2,09 | 2,48 | FAIL |
|         | A0A087WX03 |                                                                            | -2,09 | 1,39 | FAIL |
| CRLF3   | J3KST8     | cytokine receptor like factor 3                                            | -2,10 | 2,37 | FAIL |
| TLE1    | Q04724     | TLE family member 1, transcriptional corepressor                           | -2,10 | 1,97 | FAIL |
| PDHA2   | P29803     | pyruvate dehydrogenase E1 subunit alpha 2                                  | -2,12 | 1,71 | FAIL |
| KRT79   | Q5XKE5     | keratin 79                                                                 | -2,12 | 2,13 | FAIL |
| MCM7    | P33993     | minichromosome maintenance complex component 7                             | -2,13 | 2,50 | FAIL |
| MRM1    | Q6IN84     | mitochondrial rRNA methyltransferase 1                                     | -2,14 | 2,64 | FAIL |

---

|       |            |                                                       |       |      |      |
|-------|------------|-------------------------------------------------------|-------|------|------|
| KCTD3 | Q9Y597     | potassium channel tetramerization domain containing 3 | -2,51 | 1,69 | FAIL |
|       | A0A0G2JLB3 |                                                       | -2,72 | 1,76 | FAIL |
| CTSV  | O60911     | cathepsin V                                           | -2,88 | 1,32 | FAIL |
| DST   | F8W9J4     | dystonin                                              | -2,88 | 2,27 | FAIL |
| NCBP3 | Q53F19     | nuclear cap binding subunit 3                         | -3,41 | 2,14 | FAIL |
| RBM10 | P98175     | RNA binding motif protein 10                          | -3,56 | 1,50 | FAIL |
| TF    | P02787     | transferrin                                           | -3,66 | 1,44 | FAIL |
| BRCA2 | P51587     | BRCA2 DNA repair associated                           | -3,78 | 1,85 | FAIL |
| ACACB | O00763     | acetyl-CoA carboxylase beta                           | -4,84 | 1,49 | FAIL |

---



**Table S2.** Gene Ontology analysis of the 34 significantly and highly enriched proteins reveals association with MVB organization and regulation of TAG sequestering and exosome secretion.

| Term                                                                                                   | -log <sub>10</sub> (p value) | Genes                  |
|--------------------------------------------------------------------------------------------------------|------------------------------|------------------------|
| Multivesicular Body Organization (GO:0036258)                                                          | 4,65                         | IST1;HGS;STAM          |
| Multivesicular Body Organization (GO:0036257)                                                          | 4,61                         | IST1;HGS;STAM          |
| Positive Regulation Of Sequestering Of Triglyceride (GO:0010890)                                       | 4,01                         | PLIN3;LCP1             |
| Regulation Of Sequestering Of Triglyceride (GO:0010889)                                                | 3,50                         | PLIN3;LCP1             |
| Positive Regulation Of Exosomal Secretion (GO:1903543)                                                 | 3,50                         | HGS;STAM               |
| Regulation Of Exosomal Secretion (GO:1903541)                                                          | 3,28                         | HGS;STAM               |
| Positive Regulation Of Lipid Storage (GO:0010884)                                                      | 3,18                         | PLIN3;LCP1             |
| Late Endosome To Vacuole Transport Via Multivesicular Body Sorting Pathway (GO:0032511)                | 2,99                         | HGS;STAM               |
| Establishment Of Protein Localization To Vacuole (GO:0072666)                                          | 2,92                         | HGS;STAM               |
| Regulation Of Calcium-Mediated Signaling (GO:0050848)                                                  | 2,83                         | JPT2;GBP1              |
| Intracellular pH Reduction (GO:0051452)                                                                | 2,77                         | SLC4A7;ATP6V0D1        |
| Ubiquitin-Dependent Protein Catabolic Process Via The Multivesicular Body Sorting Pathway (GO:0043162) | 2,75                         | HGS;STAM               |
| Purine Nucleotide Metabolic Process (GO:0006163)                                                       | 2,72                         | SLC4A7;AMPD2           |
| Positive Regulation Of Exocytosis (GO:0045921)                                                         | 2,65                         | HGS;STAM               |
| Membrane Fission (GO:0090148)                                                                          | 2,63                         | HGS;STAM               |
| Actin Filament Organization (GO:0007015)                                                               | 2,59                         | CNN2;TAGLN2;LCP1       |
| Cellular Response To Glucose Starvation (GO:0042149)                                                   | 2,54                         | SESN2;PLIN3            |
| Organelle Assembly (GO:0070925)                                                                        | 2,50                         | IST1;HGS;STAM;ATP6V0D1 |
| Regulation Of Protein Modification Process (GO:0031399)                                                | 2,48                         | SESN2;CCDC88C          |
| Purine Ribonucleotide Biosynthetic Process (GO:0009152)                                                | 2,31                         | IMPDH1;AMPD2           |
| Positive Regulation Of Proteolysis (GO:0045862)                                                        | 2,25                         | IST1;SNX9              |
| Plasma Membrane Organization (GO:0007009)                                                              | 2,08                         | ANXA6;SNX9             |
| Phagosome Acidification (GO:0090383)                                                                   | 2,02                         | SLC4A7                 |
| Regulation Of Extracellular Exosome Assembly (GO:1903551)                                              | 2,02                         | STAM                   |
| Regulation Of Translation In Response To Endoplasmic Reticulum Stress (GO:0036490)                     | 2,02                         | SESN2                  |
| Positive Regulation Of Podosome Assembly (GO:0071803)                                                  | 2,02                         | LCP1                   |
| Zymogen Inhibition (GO:0097341)                                                                        | 2,02                         | CAST                   |
| Inner Ear Auditory Receptor Cell Differentiation (GO:0042491)                                          | 2,02                         | SLC4A7                 |
| Positive Regulation Of Cholesterol Storage (GO:0010886)                                                | 2,02                         | LCP1                   |
| Lipid Droplet Disassembly (GO:1905691)                                                                 | 2,02                         | PLIN3                  |
| Presynaptic Active Zone Organization (GO:1990709)                                                      | 2,02                         | CAST                   |
| Regulation Of Organelle Assembly (GO:1902115)                                                          | 1,99                         | STAM;TBC1D15           |
| Cytoskeleton-Dependent Cytokinesis (GO:0061640)                                                        | 1,98                         | IST1;SNX9              |
| Regulation Of Phosphorylation (GO:0042325)                                                             | 1,97                         | SESN2;CCDC88C          |
| Membrane Invagination (GO:0010324)                                                                     | 1,95                         | HGS                    |
| L-methionine Salvage (GO:0071267)                                                                      | 1,95                         | APIP                   |
| Cleavage Furrow Formation (GO:0036089)                                                                 | 1,95                         | SNX9                   |
| Response To Increased Oxygen Levels (GO:0036296)                                                       | 1,95                         | ATP6V0D1               |
| Antigen Processing And Presentation Of Endogenous Peptide Antigen Via MHC Class I (GO:0019885)         | 1,95                         | ERAP1                  |
| Positive Regulation Of Chemokine (C-X-C Motif) Ligand 2 Production (GO:2000343)                        | 1,95                         | LCP1                   |
| IMP Biosynthetic Process (GO:0006188)                                                                  | 1,88                         | AMPD2                  |

|                                                                                                   |      |                       |
|---------------------------------------------------------------------------------------------------|------|-----------------------|
| Very-Low-Density Lipoprotein Particle Remodeling (GO:0034372)                                     | 1,88 | LCP1                  |
| Inhibition Of Cysteine-Type Endopeptidase Activity (GO:0097340)                                   | 1,88 | CAST                  |
| Positive Regulation Of Cellular Component Biogenesis (GO:0044089)                                 | 1,87 | HGS;STAM              |
| Regulation Of Macroautophagy (GO:0016241)                                                         | 1,84 | SESN2;ATP6V0D1        |
| AMP Biosynthetic Process (GO:0006167)                                                             | 1,82 | APRT                  |
| Triglyceride-Rich Lipoprotein Particle Remodeling (GO:0034370)                                    | 1,82 | LCP1                  |
| Actin Filament Network Formation (GO:0051639)                                                     | 1,82 | LCP1                  |
| Inner Ear Receptor Cell Development (GO:0060119)                                                  | 1,82 | SLC4A7                |
| Regulation Of Podosome Assembly (GO:0071801)                                                      | 1,82 | LCP1                  |
| Macroautophagy (GO:0016236)                                                                       | 1,78 | HGS;STAM              |
| ESCRT III Complex Disassembly (GO:1904903)                                                        | 1,77 | IST1                  |
| ESCRT Complex Disassembly (GO:1904896)                                                            | 1,77 | IST1                  |
| Regulation Of Sequestering Of Calcium Ion (GO:0051282)                                            | 1,77 | ANXA6                 |
| IMP Metabolic Process (GO:0046040)                                                                | 1,77 | AMPD2                 |
| Cellular Response To Oxygen Levels (GO:0071453)                                                   | 1,77 | ATP6V0D1              |
| Actin-Mediated Cell Contraction (GO:0070252)                                                      | 1,77 | CCDC88C               |
| Negative Regulation Of Cellular Process (GO:0048523)                                              | 1,73 | SUZ12;HGS;SESN2;ANXA6 |
| Protein Localization To Condensed Chromosome (GO:1903083)                                         | 1,72 | CHAMP1                |
| Positive Regulation Of Lipid Localization (GO:1905954)                                            | 1,72 | LCP1                  |
| Cellular Response To Increased Oxygen Levels (GO:0036295)                                         | 1,72 | ATP6V0D1              |
| Cellular Response To Leucine (GO:0071233)                                                         | 1,72 | SESN2                 |
| Purine Ribonucleoside Triphosphate Biosynthetic Process (GO:0009206)                              | 1,72 | IMPDH1                |
| Response To Leucine (GO:0043201)                                                                  | 1,72 | SESN2                 |
| Negative Regulation Of Vascular Endothelial Growth Factor Receptor Signaling Pathway (GO:0030948) | 1,72 | HGS                   |
| Small GTPase Mediated Signal Transduction (GO:0007264)                                            | 1,72 | CCDC88C;RRAS2         |
| AMP Metabolic Process (GO:0046033)                                                                | 1,68 | AMPD2                 |
| Protein Localization To Kinetochore (GO:0034501)                                                  | 1,68 | CHAMP1                |
| Purine Ribonucleoside Monophosphate Biosynthetic Process (GO:0009168)                             | 1,68 | AMPD2                 |
| Purine Ribonucleoside Monophosphate Metabolic Process (GO:0009167)                                | 1,68 | AMPD2                 |
| Negative Regulation Of Platelet-Derived Growth Factor Receptor Signaling Pathway (GO:0010642)     | 1,68 | HGS                   |
| Heterocycle Biosynthetic Process (GO:0018130)                                                     | 1,68 | MOC52                 |
| Actin Crosslink Formation (GO:0051764)                                                            | 1,68 | LCP1                  |
| Regulation Of Adipose Tissue Development (GO:1904177)                                             | 1,68 | LCP1                  |
| Supramolecular Fiber Organization (GO:0097435)                                                    | 1,66 | CNN2;CCDC88C;TAGLN2   |
| Receptor-Mediated Endocytosis (GO:0006898)                                                        | 1,65 | HGS;SNX9              |
| Regulation Of Chemokine (C-X-C Motif) Ligand 2 Production (GO:2000341)                            | 1,65 | LCP1                  |
| Triglyceride Catabolic Process (GO:0019433)                                                       | 1,65 | LCP1                  |
| Cellular Response To Leucine Starvation (GO:1990253)                                              | 1,65 | SESN2                 |
| Negative Regulation Of Substrate Adhesion-Dependent Cell Spreading (GO:1900025)                   | 1,65 | GBP1                  |
| Attachment Of Mitotic Spindle Microtubules To Kinetochore (GO:0051315)                            | 1,65 | CHAMP1                |
| Regulation Of Platelet-Derived Growth Factor Receptor Signaling Pathway (GO:0010640)              | 1,65 | HGS                   |
| Intracellular Protein Transport (GO:0006886)                                                      | 1,63 | HGS;SNX9;STAM         |
| Cellular Response To Starvation (GO:0009267)                                                      | 1,62 | SESN2;PLIN3           |
| GTP Metabolic Process (GO:0046039)                                                                | 1,61 | IMPDH1                |
| Plasma Membrane Tubulation (GO:0097320)                                                           | 1,61 | SNX9                  |
| Regulation Of Cholesterol Storage (GO:0010885)                                                    | 1,58 | LCP1                  |

|                                                                                                                                                 |      |                |
|-------------------------------------------------------------------------------------------------------------------------------------------------|------|----------------|
| Protein Localization To Vacuole (GO:0072665)                                                                                                    | 1,58 | GBP1           |
| Positive Regulation Of Membrane Protein Ectodomain Proteolysis (GO:0051044)                                                                     | 1,58 | SNX9           |
| Protein Transport To Vacuole Involved In Ubiquitin-Dependent Protein Catabolic Process Via The Multivesicular Body Sorting Pathway (GO:0043328) | 1,58 | STAM           |
| Negative Regulation Of Receptor Signaling Pathway Via STAT (GO:1904893)                                                                         | 1,58 | HGS            |
| Epiboly Involved In Wound Healing (GO:0090505)                                                                                                  | 1,55 | LCP1           |
| Phagosome Maturation (GO:0090382)                                                                                                               | 1,55 | SLC4A7         |
| Defense Response To Protozoan (GO:0042832)                                                                                                      | 1,55 | GBP1           |
| Protein Localization (GO:0008104)                                                                                                               | 1,54 | IST1;HGS;SNX9  |
| Protein Kinase A Signaling (GO:0010737)                                                                                                         | 1,52 | LCP1           |
| DNA-templated Transcription Termination (GO:0006353)                                                                                            | 1,52 | SMN1           |
| Cellular Response To Fatty Acid (GO:0071398)                                                                                                    | 1,52 | LCP1           |
| Negative Regulation Of Receptor Signaling Pathway Via JAK-STAT (GO:0046426)                                                                     | 1,52 | HGS            |
| Positive Regulation Of Macrophage Derived Foam Cell Differentiation (GO:0010744)                                                                | 1,50 | LCP1           |
| Polyol Metabolic Process (GO:0019751)                                                                                                           | 1,50 | INPP4A         |
| Purine-Containing Compound Biosynthetic Process (GO:0072522)                                                                                    | 1,50 | SLC4A7         |
| Protein Localization To Chromosome, Centromeric Region (GO:0071459)                                                                             | 1,47 | CHAMP1         |
| Negative Regulation Of T Cell Receptor Signaling Pathway (GO:0050860)                                                                           | 1,47 | GBP1           |
| Antigen Processing And Presentation Of Peptide Antigen Via MHC Class I (GO:0002474)                                                             | 1,47 | ERAP1          |
| Cortical Actin Cytoskeleton Organization (GO:0030866)                                                                                           | 1,45 | LCP1           |
| Response To Fatty Acid (GO:0070542)                                                                                                             | 1,45 | LCP1           |
| Bicarbonate Transport (GO:0015701)                                                                                                              | 1,45 | SLC4A7         |
| Nucleotide Biosynthetic Process (GO:0009165)                                                                                                    | 1,45 | SLC4A7         |
| Regulation Of Protein Localization To Cell Periphery (GO:1904375)                                                                               | 1,43 | GBP1           |
| Negative Regulation Of Protein Localization To Cell Periphery (GO:1904376)                                                                      | 1,43 | GBP1           |
| Negative Regulation Of Protein Localization To Plasma Membrane (GO:1903077)                                                                     | 1,43 | GBP1           |
| Intracellular Monoatomic Ion Homeostasis (GO:0006873)                                                                                           | 1,43 | CNNM4          |
| Peptide Catabolic Process (GO:0043171)                                                                                                          | 1,41 | ERAP1          |
| Negative Regulation Of Interleukin-2 Production (GO:0032703)                                                                                    | 1,41 | GBP1           |
| Mitochondrial Calcium Ion Homeostasis (GO:0051560)                                                                                              | 1,41 | ANXA6          |
| Purine Nucleotide Biosynthetic Process (GO:0006164)                                                                                             | 1,41 | SLC4A7         |
| Regulation Of Lipid Storage (GO:0010883)                                                                                                        | 1,41 | LCP1           |
| Regulation Of Membrane Protein Ectodomain Proteolysis (GO:0051043)                                                                              | 1,41 | SNX9           |
| Antigen Processing And Presentation Of Endogenous Peptide Antigen (GO:0002483)                                                                  | 1,41 | ERAP1          |
| Lipid Catabolic Process (GO:0016042)                                                                                                            | 1,41 | LCP1           |
| Membrane Organization (GO:0061024)                                                                                                              | 1,40 | HGS;STAM       |
| Membrane Protein Ectodomain Proteolysis (GO:0006509)                                                                                            | 1,39 | ERAP1          |
| Cellular Response To Low-Density Lipoprotein Particle Stimulus (GO:0071404)                                                                     | 1,39 | LCP1           |
| Regulation Of Vascular Endothelial Growth Factor Receptor Signaling Pathway (GO:0030947)                                                        | 1,39 | HGS            |
| Cytoskeleton-Dependent Intracellular Transport (GO:0030705)                                                                                     | 1,39 | CCDC88C        |
| Inositol Phosphate Metabolic Process (GO:0043647)                                                                                               | 1,39 | INPP4A         |
| Regulation Of Catabolic Process (GO:0009894)                                                                                                    | 1,39 | HGS            |
| Vesicle-Mediated Transport (GO:0016192)                                                                                                         | 1,37 | HGS;PLIN3;SNX9 |
| Microtubule Nucleation (GO:0007020)                                                                                                             | 1,37 | NEDD1          |
| Lymphocyte Activation Involved In Immune Response (GO:0002285)                                                                                  | 1,37 | LCP1           |
| Acylglycerol Catabolic Process (GO:0046464)                                                                                                     | 1,35 | LCP1           |
| Acylglycerol Homeostasis (GO:0055090)                                                                                                           | 1,35 | LCP1           |

---

|                                                                                 |      |                |
|---------------------------------------------------------------------------------|------|----------------|
| Response To Hexose (GO:0009746)                                                 | 1,35 | LCP1           |
| Negative Regulation Of Antigen Receptor-Mediated Signaling Pathway (GO:0050858) | 1,35 | GBP1           |
| Endosomal Transport (GO:0016197)                                                | 1,34 | HGS;SNX9       |
| Negative Regulation Of Protein Localization To Membrane (GO:1905476)            | 1,33 | GBP1           |
| Wound Healing, Spreading Of Cells (GO:0044319)                                  | 1,33 | LCP1           |
| Negative Regulation Of TORC1 Signaling (GO:1904262)                             | 1,33 | SESN2          |
| Phosphate-Containing Compound Metabolic Process (GO:0006796)                    | 1,32 | INPP4A;LCP1    |
| Spindle Assembly Checkpoint Signaling (GO:0071173)                              | 1,32 | SPC25          |
| Protein Targeting To Lysosome (GO:0006622)                                      | 1,32 | HGS            |
| Plasma Membrane Invagination (GO:0099024)                                       | 1,32 | SNX9           |
| Mitotic Spindle Assembly Checkpoint Signaling (GO:0007094)                      | 1,32 | SPC25          |
| Mitotic Spindle Checkpoint Signaling (GO:0071174)                               | 1,32 | SPC25          |
| Cellular Response To Acid Chemical (GO:0071229)                                 | 1,30 | SESN2          |
| Metallo-Sulfur Cluster Assembly (GO:0031163)                                    | 1,30 | BOLA1          |
| T Cell Activation Involved In Immune Response (GO:0002286)                      | 1,30 | LCP1           |
| Positive Regulation Of TORC1 Signaling (GO:1904263)                             | 1,30 | SESN2          |
| Cortical Cytoskeleton Organization (GO:0030865)                                 | 1,30 | LCP1           |
| Iron-Sulfur Cluster Assembly (GO:0016226)                                       | 1,30 | BOLA1          |
| Intracellular Monoatomic Cation Homeostasis (GO:0030003)                        | 1,30 | ATP6V0D1;CNNM4 |

---

**Table S3:** HPLC-MS/MS parameters for quantification of sphingolipids

| Sphingolipid              | Precursor ion ( <i>m/z</i> )              | Product ion ( <i>m/z</i> ) <sup>a</sup> | Retention time (min) | Calibration Reference Compound | Internal Standard         |
|---------------------------|-------------------------------------------|-----------------------------------------|----------------------|--------------------------------|---------------------------|
| C17:0 Cer                 | 534.5 [M-H <sub>2</sub> O+H] <sup>+</sup> | <b>264.3</b> / 282.3                    | 14.9                 | -                              | -                         |
| C16:0 Cer                 | 520.5 [M-H <sub>2</sub> O+H] <sup>+</sup> | <b>264.3</b> / 282.3                    | 13.9                 | C16:0 Cer                      | C17:0 Cer                 |
| C18:0 Cer                 | 548.5 [M-H <sub>2</sub> O+H] <sup>+</sup> | <b>264.3</b> / 282.3                    | 15.9                 | C18:0 Cer                      | C17:0 Cer                 |
| C20:0 Cer                 | 576.6 [M-H <sub>2</sub> O+H] <sup>+</sup> | <b>264.3</b> / 282.3                    | 18.5                 | C20:0 Cer                      | C17:0 Cer                 |
| C22:0 Cer                 | 604.6 [M-H <sub>2</sub> O+H] <sup>+</sup> | <b>264.3</b> / 282.3                    | 21.6                 | C22:0 Cer                      | C17:0 Cer                 |
| C24:0 Cer                 | 632.6 [M-H <sub>2</sub> O+H] <sup>+</sup> | <b>264.3</b> / 282.3                    | 25.2                 | C24:0 Cer                      | C17:0 Cer                 |
| C24:1 Cer                 | 630.6 [M-H <sub>2</sub> O+H] <sup>+</sup> | <b>264.3</b> / 282.3                    | 21.8                 | C24:1 Cer                      | C17:0 Cer                 |
| d <sub>31</sub> -C16:0 SM | 734.6 [M+H] <sup>+</sup>                  | 86.1 / <b>184.0</b>                     | 12.8                 | -                              | -                         |
| C16:0 SM                  | 703.6 [M+H] <sup>+</sup>                  | 86.1 / <b>184.0</b>                     | 13.0                 | C16:0 SM                       | d <sub>31</sub> -C16:0 SM |
| C18:0 SM                  | 731.6 [M+H] <sup>+</sup>                  | 86.1 / <b>184.0</b>                     | 14.8                 | C18:0 SM                       | d <sub>31</sub> -C16:0 SM |
| C20:0 SM                  | 759.6 [M+H] <sup>+</sup>                  | 86.1 / <b>184.0</b>                     | 17.1                 | C20:0 SM                       | d <sub>31</sub> -C16:0 SM |
| C22:0 SM                  | 787.7 [M+H] <sup>+</sup>                  | 86.1 / <b>184.0</b>                     | 19.8                 | C22:0 SM                       | d <sub>31</sub> -C16:0 SM |
| C24:0 SM                  | 815.7 [M+H] <sup>+</sup>                  | 86.1 / <b>184.0</b>                     | 23.2                 | C24:0 SM                       | d <sub>31</sub> -C16:0 SM |
| C24:1 SM                  | 813.7 [M+H] <sup>+</sup>                  | <b>86.1</b> / 184.0                     | 19.9                 | C24:1 SM                       | d <sub>31</sub> -C16:0 SM |

<sup>a</sup>Quantifiers are given in bold.**Table S4:** HPLC-MS/MS parameters for quantification of diacylglycerols

| Diacylglycerol                | Precursor ion ( <i>m/z</i> )              | Product ion ( <i>m/z</i> ) <sup>a</sup> | Retention time (min) | Calibration Reference Compound | Internal Standard             |
|-------------------------------|-------------------------------------------|-----------------------------------------|----------------------|--------------------------------|-------------------------------|
| d <sub>5</sub> -C17:0 / C17:0 | 584.6 [M-H <sub>2</sub> O+H] <sup>+</sup> | <b>57.2</b> / 253.2                     | 17.4                 | -                              | -                             |
| C16:0 / C16:0                 | 551.5 [M-H <sub>2</sub> O+H] <sup>+</sup> | <b>57.2</b> / 239.2                     | 14.6                 | C16:0 / C16:0                  | d <sub>5</sub> -C17:0 / C17:0 |
| C18:0 / C18:0                 | 607.6 [M-H <sub>2</sub> O+H] <sup>+</sup> | <b>57.2</b> / 267.3                     | 20.3                 | C18:0 / C18:0                  | d <sub>5</sub> -C17:0 / C17:0 |
| C16:0 / C18:0                 | 579.5 [M-H <sub>2</sub> O+H] <sup>+</sup> | <b>239.2</b> / 267.3                    | 17.5                 | C16:0 / C16:0                  | d <sub>5</sub> -C17:0 / C17:0 |
| C16:0 / C18:1                 | 612.6 [M+NH <sub>4</sub> ] <sup>+</sup>   | <b>313.3</b> / 339.3                    | 15.6                 | C16:0 / C18:1                  | d <sub>5</sub> -C17:0 / C17:0 |
| C16:0 / C18:2                 | 610.5 [M+NH <sub>4</sub> ] <sup>+</sup>   | <b>313.3</b> / 337.3                    | 13.8                 | C18:0 / C20:4                  | d <sub>5</sub> -C17:0 / C17:0 |
| C18:0 / C18:1                 | 640.6 [M+NH <sub>4</sub> ] <sup>+</sup>   | 339.3 / <b>341.3</b>                    | 18.5                 | C16:0 / C18:1                  | d <sub>5</sub> -C17:0 / C17:0 |
| C18:0 / C18:2                 | 638.6 [M+NH <sub>4</sub> ] <sup>+</sup>   | 337.3 / <b>341.3</b>                    | 16.6                 | C18:0 / C20:4                  | d <sub>5</sub> -C17:0 / C17:0 |
| C18:0 / C20:4                 | 662.6 [M+NH <sub>4</sub> ] <sup>+</sup>   | <b>341.3</b> / 361.3                    | 16.4                 | C18:0 / C20:4                  | d <sub>5</sub> -C17:0 / C17:0 |
| C18:1 / C18:1                 | 638.6 [M+NH <sub>4</sub> ] <sup>+</sup>   | 57.2 / <b>339.3</b>                     | 16.5                 | C18:0 / C20:4                  | d <sub>5</sub> -C17:0 / C17:0 |
| C18:1 / C18:2                 | 636.6 [M+NH <sub>4</sub> ] <sup>+</sup>   | 337.3 / <b>339.3</b>                    | 14.7                 | C18:0 / C20:4                  | d <sub>5</sub> -C17:0 / C17:0 |
| C18:2 / C18:2                 | 634.6 [M+NH <sub>4</sub> ] <sup>+</sup>   | 57.2 / <b>337.3</b>                     | 12.9                 | C18:0 / C20:4                  | d <sub>5</sub> -C17:0 / C17:0 |

<sup>a</sup>Quantifiers are given in bold.
